# Supplementary material for: Stereodivergent synthesis of enantioenriched azepino[3,4,5-cd]-indoles via cooperative Cu/Ir-catalyzed asymmetric allylic alkylation and intramolecular Friedel–Crafts reaction
Source: Royal Society of Chemistry journal article supplement (doi:10.1039/d1sc07271d), 2022-01-01
Supplement: d1sc07271d1.pdf [file d1sc07271d1.pdf]

*Supplementary Information*

**Stereodivergent Synthesis of Enantioenriched Azepino[3,4,5-*cd*]-Indoles via  
Cooperative Cu/Ir-Catalyzed Asymmetric Allylic Alkylation and  
Intramolecular Friedel-Crafts Reaction**

Lu Xiao,<sup>1,2,4</sup> Bo Li,<sup>3,4</sup> Fan Xiao,<sup>1</sup> Cong Fu,<sup>1</sup> Liang Wei,<sup>1</sup> Yanfeng Dang,<sup>3\*</sup> Xiu-Qin Dong,<sup>1\*</sup> Chun-Jiang Wang<sup>1,2\*</sup>

<sup>1</sup>College of Chemistry and Molecular Sciences, Wuhan University, Wuhan 430072, China; <sup>2</sup>State Key Laboratory of Elemento-organic Chemistry, Nankai University, Tianjin 300071, China; <sup>3</sup>Tianjin Key Laboratory of Molecular Optoelectronic Sciences, Department of Chemistry, Tianjin University, Tianjin 300072, China; <sup>4</sup>These two authors contributed equally.

*E-mail:* yanfeng.dang@tju.edu.cn (Y.D.); xiuqindong@whu.edu.cn (X.-Q.D.); cjwang@whu.edu.cn (C.-J.W.)

**Table of Contents**

|                                                                                   |    |
|-----------------------------------------------------------------------------------|----|
| 1. Computational Method.....                                                      | S2 |
| 2. Supplementary Computational Results.....                                       | S3 |
| 3. Electronic Energies, Enthalpies and Free Energies of Optimized Structures..... | S6 |
| 4. Cartesian Coordinates of Optimized Structures.....                             | S8 |

## Computational Methods

All quantum mechanical computations were carried out in the Gaussian 09 program with the M06-L functional. Geometries were optimized by using M06-L and a mixed SDD(Fe, Cu, Zn, Ir)-6-31G(d) basis set<sup>1</sup> and were verified by harmonic vibrational frequency calculations to be energy minima or transition states (no or one imaginary frequency, respectively). Single-point energies were evaluated with M06-L and the def2-TZVP basis set<sup>2</sup> for all atoms, in which the solvation effects were considered using the SMD model<sup>3</sup> with DCE and DCM solvent. The GoodVibes package was utilized for computing thermodynamic quantities at 1 mol/L. Molecular visualizations were carried out in CYLview and PyMOL.<sup>4</sup> Steric contour and non-covalent interaction (NCI) plots were produced in Multiwfn. The independent gradient model (IGM) was employed for visualizing intermolecular NCIs between allyl-iridium and copper azomethine ylide species.<sup>5</sup> Grimme's dftd code was utilized to estimate dispersion energies using DFT-D3(BJ) parameters for Hartree-Fock theory.<sup>6</sup>

- (1) (a) D. Andrae, U. Häussermann, M. Dolg, H. Stoll, H. Preuss, *Theor. Chim. Acta.* 1990, **77**, 123-141.
- (b) L. E. Roy, P. J. Hay, R. L. Martin, *J. Chem. Theory Comput.* 2008, **4**, 1029-1031.
- (2) F. Weigend, R. Ahlrichs, *Phys. Chem. Chem. Phys.* 2005, **7**, 3297-3305.
- (3) A. V. Marenich, C. J. Cramer, D. G. Truhlar, *J. Phys. Chem. B* 2009, **113**, 6378-6396.
- (4) (a) C. Y. Legault, *CYLview, 1.0b*; Université de Sherbrooke: Quebec, Montreal, Canada, 2009. (b) W. L. Delano, *The PyMOL molecular graphics system*; Delano Scientific: 2002.
- (5) C. Lefebvre, G. Rubez, H. Khartabil, J.-C. Boisson, J. Contreras-García, E. Hénon, *Phys. Chem. Chem. Phys.* 2017, **19**, 17928-17936.
- (6) S. Grimme, S. Ehrlich, L. Goerigk, *J. Comput. Chem.* 2011, **32**, 1456-1465.

## Supplementary Computational Results

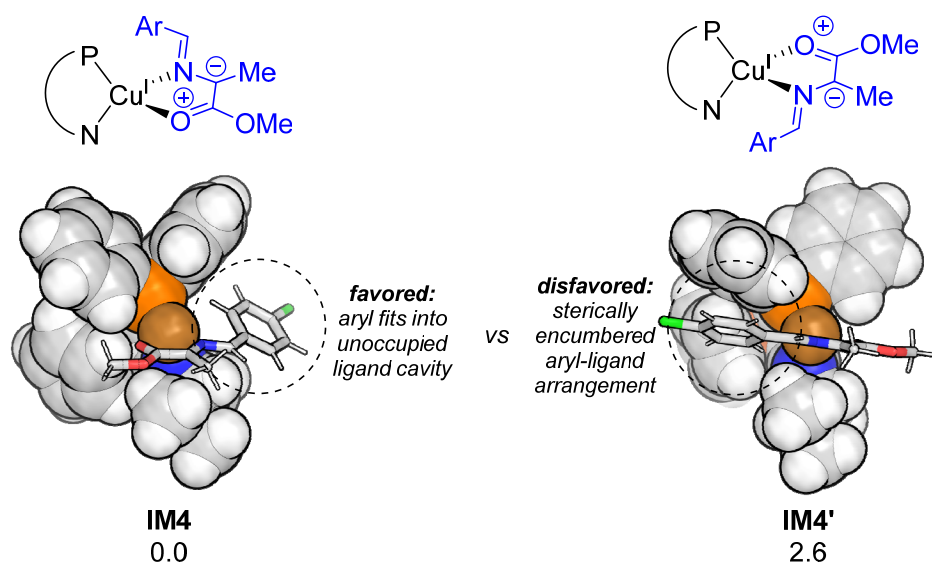

**Fig. S1** Diastereomers of Cu-AMY species (ligand: (*S,S*)-L1). Relative free energies are given in kcal/mol.

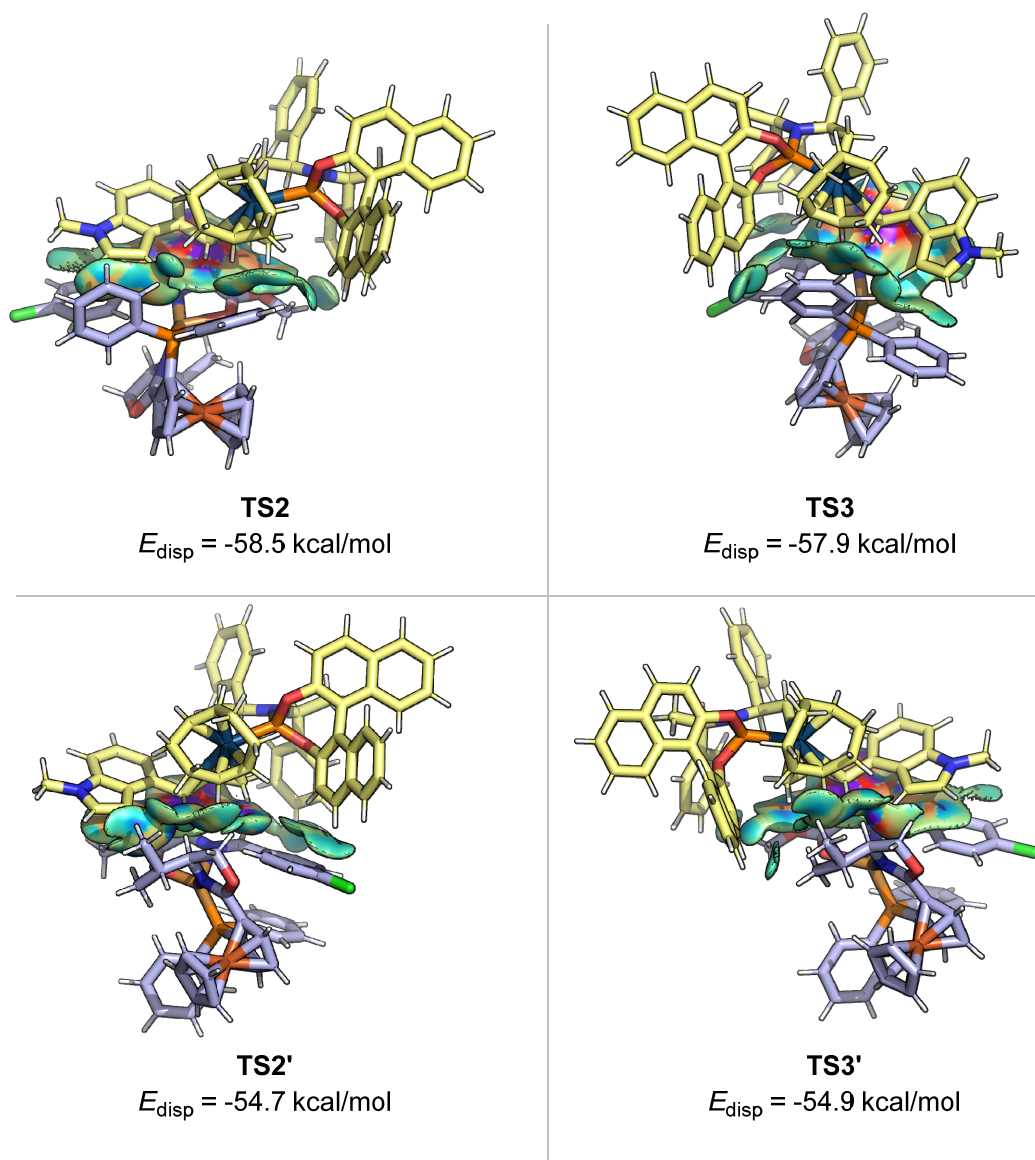

**Fig. S2** Non-covalent interaction plots for bond-forming transition states in Cu/Ir dual catalysis. Dispersion interaction energies are provided alongside.

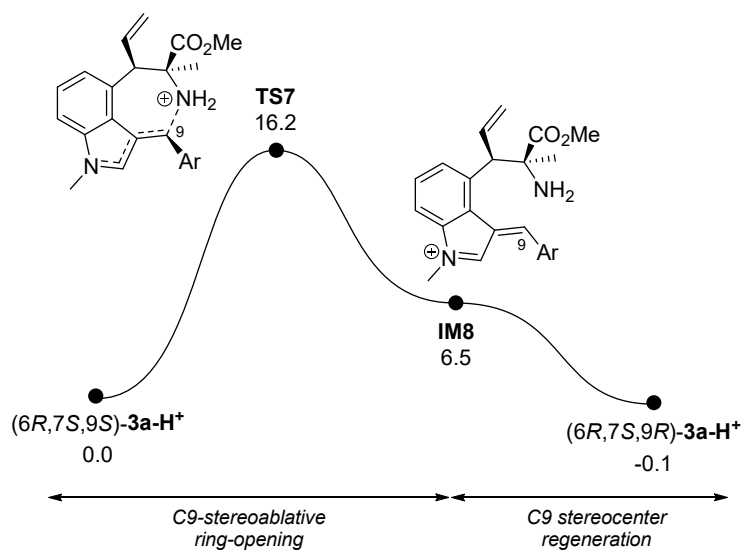

**Fig. S3** Free-energy profile for the TFA-promoted C9-epimerization of (6R,7S,9S)-**3a** (kcal/mol).

## Electronic Energies, Enthalpies and Free Energies of Optimized Structures

|                                           | $E_{\text{gas}}$ (a.u.) | $E_{\text{DCE}}$ (a.u.) | $H_{\text{DCE}}$ (a.u.) | $G_{\text{DCE}}$ (a.u.) | $\nu_{\text{imag}}$ ( $\text{cm}^{-1}$ ) |
|-------------------------------------------|-------------------------|-------------------------|-------------------------|-------------------------|------------------------------------------|
| <b>2a</b>                                 | -822.835283             | -823.157936             | -822.871871             | -822.934821             |                                          |
| $^{-}\text{OCO}_2\text{Me}$               | -303.701032             | -303.917754             | -303.857811             | -303.888852             |                                          |
| <b>IM1</b>                                | -2352.170326            | -2352.938258            | -2352.154749            | -2352.266783            |                                          |
| <b>IM2a</b>                               | -3175.049332            | -3176.122615            | -3175.049232            | -3175.195855            |                                          |
| <b>IM2b</b>                               | -3175.030447            | -3176.109773            | -3175.037358            | -3175.18638             |                                          |
| <b>TS1a</b>                               | -3175.011647            | -3176.101278            | -3175.030509            | -3175.179049            | -154.01                                  |
| <b>TS1b</b>                               | -3175.007779            | -3176.096823            | -3175.025758            | -3175.174282            | -170.08                                  |
| <b>IM3a</b>                               | -2871.192734            | -2872.186196            | -2871.176668            | -2871.311268            |                                          |
| <b>IM3b</b>                               | -2871.185382            | -2872.179776            | -2871.17038             | -2871.306668            |                                          |
| <b>IM4</b>                                | -2967.547282            | -5551.157434            | -5550.415977            | -5550.538326            |                                          |
| <b>IM4'</b>                               | -2967.538643            | -5551.15148             | -5550.410095            | -5550.534242            |                                          |
| <b>TS2</b>                                | -5838.777487            | -8423.354292            | -8421.601883            | -8421.831105            | -341.69                                  |
| <b>TS2'</b>                               | -5838.769827            | -8423.347516            | -8421.595799            | -8421.823669            | -344.49                                  |
| <b>TS3</b>                                | -5838.776810            | -8423.354241            | -8421.60234             | -8421.832724            | -327.84                                  |
| <b>TS3'</b>                               | -5838.768257            | -8423.345466            | -8421.593456            | -8421.822427            | -324.94                                  |
| $\text{Zn}(\text{OTf})_2$                 | -2149.942748            | -3702.750861            | -3702.674013            | -3702.738374            |                                          |
| $^{-}\text{OTf}$                          | -961.447160             | -961.828725             | -961.793161             | -961.830549             |                                          |
| <b>IM5</b>                                | -1610.261600            | -1610.722229            | -1610.282117            | -1610.36147             |                                          |
| <b>IM6</b>                                | -1610.256951            | -1610.719838            | -1610.280322            | -1610.362051            |                                          |
| <b>TS4</b>                                | -2798.602034            | -4351.625821            | -4351.144631            | -4351.247034            | -264.28                                  |
| <b>TS4'</b>                               | -2798.621165            | -4351.637428            | -4351.156034            | -4351.256732            | -213.73                                  |
| <b>TS5</b>                                | -2798.625269            | -4351.641454            | -4351.160003            | -4351.261702            | -181.27                                  |
| <b>TS5'</b>                               | -2798.593802            | -4351.622007            | -4351.1406              | -4351.242732            | -277.78                                  |
| <b>(6<i>S</i>,7<i>S</i>,9<i>R</i>)-3a</b> | -1610.256045            | -1610.725308            | -1610.282722            | -1610.362064            |                                          |
| <b>(6<i>S</i>,7<i>S</i>,9<i>S</i>)-3a</b> | -1610.255654            | -1610.723917            | -1610.281764            | -1610.360066            |                                          |
| <b>(6<i>R</i>,7<i>S</i>,9<i>S</i>)-3a</b> | -1610.258951            | -1610.727453            | -1610.285031            | -1610.363924            |                                          |
| <b>(6<i>R</i>,7<i>S</i>,9<i>R</i>)-3a</b> | -1610.254040            | -1610.722868            | -1610.279997            | -1610.357554            |                                          |

|                                                         | $E_{\text{low}}$ (a.u.) | $E_{\text{DCM,high}}$ (a.u.) | $H_{\text{DCM,high}}$ (a.u.) | $G_{\text{DCM,high}}$ (a.u.) | $\nu_{\text{imag}}$ ( $\text{cm}^{-1}$ ) |
|---------------------------------------------------------|-------------------------|------------------------------|------------------------------|------------------------------|------------------------------------------|
| <b>(6<i>S</i>,7<i>S</i>,9<i>R</i>)-3a-H<sup>+</sup></b> | -1610.649720            | -1611.177946                 | -1610.720707                 | -1610.799924                 |                                          |
| <b>(6<i>S</i>,7<i>S</i>,9<i>S</i>)-3a-H<sup>+</sup></b> | -1610.655455            | -1611.182585                 | -1610.725232                 | -1610.804146                 |                                          |
| <b>(6<i>R</i>,7<i>S</i>,9<i>S</i>)-3a-H<sup>+</sup></b> | -1610.656875            | -1611.183643                 | -1610.726107                 | -1610.803521                 |                                          |
| <b>(6<i>R</i>,7<i>S</i>,9<i>R</i>)-3a-H<sup>+</sup></b> | -1610.654655            | -1611.181322                 | -1610.724193                 | -1610.803646                 |                                          |
| <b>TS6</b>                                              | -1610.644690            | -1611.154845                 | -1610.701173                 | -1610.781756                 | -53.75                                   |
| <b>TS7</b>                                              | -1610.637868            | -1611.152762                 | -1610.698957                 | -1610.777696                 | -45.08                                   |
| <b>IM7</b>                                              | -1610.649281            | -1611.162430                 | -1610.707567                 | -1610.788087                 |                                          |
| <b>IM8</b>                                              | -1610.653378            | -1611.166037                 | -1610.711714                 | -1610.793108                 |                                          |

## Cartesian Coordinates of Optimized Structures

2a

| Atomic Type | Coordinates (Angstroms) |             |             |
|-------------|-------------------------|-------------|-------------|
|             | X                       | Y           | Z           |
| C           | -2.52069700             | -0.09362900 | -0.83597800 |
| H           | -2.95656500             | 0.25718300  | -1.78214800 |
| H           | -2.41542000             | -1.18370300 | -0.91243000 |
| C           | -1.23528600             | 0.56953900  | -0.52206200 |
| H           | -1.28690800             | 1.64355300  | -0.33465100 |
| C           | -0.06091300             | -0.07978300 | -0.49644100 |
| H           | -0.08224100             | -1.16062000 | -0.66334200 |
| O           | -3.45899300             | 0.22073000  | 0.22138100  |
| C           | -4.70577300             | -0.19803100 | -0.02243700 |
| O           | -5.08902900             | -0.79431900 | -1.00421600 |
| O           | -5.46115000             | 0.16273400  | 1.02650000  |
| C           | -6.82880000             | -0.22591200 | 0.90429900  |
| H           | -7.29320400             | 0.25282400  | 0.03617500  |
| H           | -7.30826100             | 0.10744400  | 1.82558200  |
| H           | -6.91613500             | -1.31145100 | 0.79644500  |
| C           | 1.25888300              | 0.49148900  | -0.27063500 |
| C           | 2.37414100              | -0.36301000 | -0.10230200 |
| C           | 1.49421300              | 1.86906200  | -0.21130000 |
| C           | 3.65838400              | 0.20153100  | 0.12275200  |
| C           | 2.54257500              | -1.78057500 | -0.09730400 |
| C           | 2.76870100              | 2.39884200  | 0.01436100  |
| H           | 0.66260000              | 2.55663900  | -0.35739700 |
| C           | 3.87594200              | 1.57574500  | 0.18569600  |
| C           | 3.87287000              | -2.02350000 | 0.11883300  |
| H           | 1.78092400              | -2.53870700 | -0.23048600 |
| H           | 2.89554100              | 3.47918100  | 0.04919100  |
| H           | 4.86815400              | 1.99093600  | 0.35561700  |
| H           | 4.41299900              | -2.96052100 | 0.19292500  |
| N           | 4.55676400              | -0.83450500 | 0.25412200  |
| C           | 5.96874800              | -0.68368300 | 0.48701700  |
| H           | 6.15906200              | -0.14120500 | 1.42191000  |
| H           | 6.45061000              | -0.13884100 | -0.33493800 |
| H           | 6.42694400              | -1.67284800 | 0.56237400  |

<sup>-</sup>OCO<sub>2</sub>Me

| Atomic Type | Coordinates (Angstroms) |             |             |
|-------------|-------------------------|-------------|-------------|
|             | X                       | Y           | Z           |
| O           | -1.68463600             | -0.62501300 | -0.00010200 |
| C           | -0.66730300             | 0.07497400  | 0.00010200  |
| O           | -0.45388400             | 1.29874000  | 0.00001300  |

|   |            |             |             |
|---|------------|-------------|-------------|
| O | 0.55476500 | -0.76524100 | 0.00012900  |
| C | 1.73630300 | -0.03499100 | -0.00008400 |
| H | 2.57336300 | -0.75537100 | -0.00052900 |
| H | 1.84103600 | 0.62401800  | -0.88134500 |
| H | 1.84164900 | 0.62357700  | 0.88145100  |

IM1

| Atomic Type | Coordinates (Angstroms) |             |             |
|-------------|-------------------------|-------------|-------------|
|             | X                       | Y           | Z           |
| Ir          | -1.60521600             | -1.76923200 | 0.54933100  |
| O           | 0.77666400              | 0.12101600  | -1.19956300 |
| O           | 0.80632300              | 0.23115500  | 1.35659800  |
| C           | 1.93107900              | -0.64375100 | -1.17621700 |
| C           | 2.01632600              | -1.71859600 | -2.08223000 |
| H           | 1.18959100              | -1.88047700 | -2.77030700 |
| C           | 3.13073600              | -2.51823900 | -2.08913600 |
| H           | 3.20762800              | -3.34980200 | -2.78878500 |
| C           | 4.18569400              | -2.29282800 | -1.17301300 |
| C           | 5.30854800              | -3.15265200 | -1.11276600 |
| H           | 5.35213500              | -3.99632500 | -1.80157800 |
| C           | 6.31366700              | -2.94298200 | -0.19932100 |
| H           | 7.16814000              | -3.61595700 | -0.15972600 |
| C           | 6.22917200              | -1.85916400 | 0.69835000  |
| H           | 7.01371100              | -1.70767900 | 1.43749700  |
| C           | 5.15992700              | -0.99512400 | 0.65461000  |
| H           | 5.10211500              | -0.16864600 | 1.35957900  |
| C           | 4.11291800              | -1.17229200 | -0.28410100 |
| C           | 2.98026700              | -0.29661600 | -0.34006400 |
| C           | 2.90289200              | 0.94538000  | 0.45614000  |
| C           | 3.89703300              | 1.97202700  | 0.35163000  |
| C           | 4.96746300              | 1.90692700  | -0.57562100 |
| H           | 5.04155700              | 1.04741400  | -1.23729700 |
| C           | 5.89759000              | 2.91617400  | -0.66207300 |
| H           | 6.70368300              | 2.84252000  | -1.38988900 |
| C           | 5.81235200              | 4.04694000  | 0.17491800  |
| H           | 6.55718400              | 4.83686400  | 0.09960000  |
| C           | 4.77679000              | 4.15307300  | 1.07151900  |
| H           | 4.68598500              | 5.02974900  | 1.71294000  |
| C           | 3.79346700              | 3.13969600  | 1.17660200  |
| C           | 2.69662400              | 3.26457400  | 2.06277400  |
| H           | 2.63093900              | 4.14874600  | 2.69609100  |
| C           | 1.71482000              | 2.30804100  | 2.10446200  |
| H           | 0.85157200              | 2.40262300  | 2.75899400  |



|   |             |             |             |   |             |             |             |
|---|-------------|-------------|-------------|---|-------------|-------------|-------------|
| C | 1.81324100  | 1.16629300  | 1.28276000  | H | -0.31540400 | -5.40363500 | 1.71113400  |
| P | -0.27281600 | -0.03075300 | 0.09058300  | H | -0.47163100 | -4.01008300 | 2.76726000  |
| N | -1.21401400 | 1.32712300  | -0.13668100 | C | -0.24490500 | -3.47544900 | 0.73274800  |
| C | -2.79259400 | -0.12458800 | 1.15364700  | H | 0.76234300  | -3.09675500 | 0.93336300  |
| H | -2.50390200 | 0.06785200  | 2.20286800  | C | -0.69521900 | -3.42762400 | -0.60148700 |
| H | -3.86802600 | -0.35926100 | 1.18136600  | H | -0.01159700 | -2.99082200 | -1.32792900 |
| C | -2.61886800 | 1.16706200  | 0.34984900  | C | -1.73336200 | -4.36114500 | -1.19090800 |
| H | -3.25895100 | 1.11357900  | -0.54651200 | H | -1.47338500 | -4.57605800 | -2.23533900 |
| C | -3.02762800 | 2.38147200  | 1.15271300  | H | -1.70139800 | -5.33187500 | -0.67989400 |
| C | -2.28598000 | 2.75155800  | 2.27983100  | C | -3.15073300 | -3.77197300 | -1.14623400 |
| H | -1.40872200 | 2.15879400  | 2.54540300  | H | -3.90311500 | -4.57580300 | -1.21989900 |
| C | -2.65453200 | 3.85054700  | 3.04461100  | H | -3.30475800 | -3.13487300 | -2.02749000 |
| H | -2.06626000 | 4.12745300  | 3.91854400  |   |             |             |             |
| C | -3.78022600 | 4.59779600  | 2.69551300  |   |             |             |             |
| H | -4.07199300 | 5.45897700  | 3.29416200  |   |             |             |             |
| C | -4.52634500 | 4.23763900  | 1.57767000  |   |             |             |             |
| H | -5.40449300 | 4.81770300  | 1.29777100  |   |             |             |             |
| C | -4.14750400 | 3.13800300  | 0.80796000  |   |             |             |             |
| H | -4.72181500 | 2.86347300  | -0.07834800 |   |             |             |             |
| C | -1.02841300 | 2.55081900  | -0.95036400 |   |             |             |             |
| H | -1.44600300 | 3.35928000  | -0.33017400 |   |             |             |             |
| C | -1.86613800 | 2.48636100  | -2.21425000 |   |             |             |             |
| C | -2.63516900 | 3.58983000  | -2.58735100 |   |             |             |             |
| H | -2.64921200 | 4.46932300  | -1.94094800 |   |             |             |             |
| C | -3.38835100 | 3.57159800  | -3.75850300 |   |             |             |             |
| H | -3.98645600 | 4.43913300  | -4.03288900 |   |             |             |             |
| C | -3.38467700 | 2.43994400  | -4.56906100 |   |             |             |             |
| H | -3.97743900 | 2.41870400  | -5.48199000 |   |             |             |             |
| C | -2.62471900 | 1.33061200  | -4.20117200 |   |             |             |             |
| H | -2.62235300 | 0.44047800  | -4.82863400 |   |             |             |             |
| C | -1.87065000 | 1.35291100  | -3.03210400 |   |             |             |             |
| H | -1.28717900 | 0.47983000  | -2.73745500 |   |             |             |             |
| C | 0.40196000  | 2.96405500  | -1.26784300 |   |             |             |             |
| H | 1.01510000  | 3.02130800  | -0.36348200 |   |             |             |             |
| H | 0.88856600  | 2.29818200  | -1.98334400 |   |             |             |             |
| H | 0.36582400  | 3.96614500  | -1.71103300 |   |             |             |             |
| C | -3.40847100 | -2.92972400 | 0.07247300  |   |             |             |             |
| H | -4.20923700 | -2.19630000 | -0.04040500 |   |             |             |             |
| C | -3.00904200 | -3.25414000 | 1.37868500  |   |             |             |             |
| H | -3.51044200 | -2.71666500 | 2.18722200  |   |             |             |             |
| C | -2.31338000 | -4.53954800 | 1.77319300  |   |             |             |             |
| H | -2.65632100 | -4.83800400 | 2.77184400  |   |             |             |             |
| H | -2.62417500 | -5.35167400 | 1.10371400  |   |             |             |             |
| C | -0.78128000 | -4.40664200 | 1.79070000  |   |             |             |             |

### IM2a

| Atomic<br>Type | Coordinates (Angstroms) |             |             |
|----------------|-------------------------|-------------|-------------|
|                | X                       | Y           | Z           |
| Ir             | -1.14336700             | -0.55771800 | 1.18563700  |
| O              | 1.81930100              | -0.37914700 | -0.80130100 |
| O              | 1.81743100              | 0.82691000  | 1.43968800  |
| C              | 2.81909700              | -1.20991600 | -0.32479300 |
| C              | 2.71452300              | -2.58267300 | -0.62818800 |
| H              | 1.87617400              | -2.93018700 | -1.23216800 |
| C              | 3.68082100              | -3.44657600 | -0.17910000 |
| H              | 3.61620100              | -4.50848000 | -0.41322200 |
| C              | 4.76113200              | -2.98222900 | 0.60849400  |
| C              | 5.72179000              | -3.87529500 | 1.14104300  |
| H              | 5.62167100              | -4.93681100 | 0.91473300  |
| C              | 6.74679200              | -3.42322400 | 1.93637100  |
| H              | 7.47382800              | -4.12233400 | 2.34496300  |
| C              | 6.84466800              | -2.04950700 | 2.23663000  |
| H              | 7.64147700              | -1.69434000 | 2.88778600  |
| C              | 5.93759300              | -1.15248500 | 1.72162900  |
| H              | 6.01986800              | -0.09764900 | 1.97262400  |
| C              | 4.87860500              | -1.58034200 | 0.88216000  |
| C              | 3.90915600              | -0.67159600 | 0.34442500  |
| C              | 4.02365700              | 0.79352000  | 0.52213200  |
| C              | 5.17346900              | 1.53738300  | 0.09956100  |
| C              | 6.24522000              | 0.94711900  | -0.61637500 |
| H              | 6.19914900              | -0.11203100 | -0.85889000 |
| C              | 7.33023800              | 1.69229900  | -1.01696200 |
| H              | 8.13576500              | 1.21312500  | -1.57039200 |
| C              | 7.40578100              | 3.06885500  | -0.72345500 |
| H              | 8.27248300              | 3.64606000  | -1.03955700 |
| C              | 6.37487800              | 3.67871600  | -0.05016500 |
| H              | 6.40981200              | 4.74573000  | 0.16976000  |

|   |             |             |             |   |             |             |             |
|---|-------------|-------------|-------------|---|-------------|-------------|-------------|
| C | 5.23761600  | 2.94550400  | 0.36486100  | H | -0.19891300 | 0.99468800  | 3.20247800  |
| C | 4.15787300  | 3.58054500  | 1.02484800  | C | 0.42591400  | -1.02253200 | 3.84485400  |
| H | 4.22551100  | 4.64671600  | 1.23987200  | H | 1.25668400  | -0.46246100 | 4.29133700  |
| C | 3.03426600  | 2.87205700  | 1.36664700  | H | -0.07419100 | -1.52491800 | 4.68562800  |
| H | 2.18285700  | 3.33770100  | 1.85914100  | C | 0.99699800  | -2.05297400 | 2.86409400  |
| C | 2.97126300  | 1.49348100  | 1.08732100  | H | 1.31428600  | -2.96656700 | 3.39601100  |
| P | 0.74692500  | 0.34481600  | 0.24565500  | H | 1.90740500  | -1.64306300 | 2.40582500  |
| N | 0.33968000  | 1.67141200  | -0.69667200 | C | 0.03929500  | -2.42066000 | 1.75756500  |
| C | -1.58373700 | 1.51861100  | 0.86372500  | H | 0.50623500  | -2.82496100 | 0.85614100  |
| H | -1.18936600 | 2.08933500  | 1.72140500  | C | -1.32161700 | -2.68624700 | 1.95268700  |
| H | -2.67340500 | 1.65165200  | 0.86744800  | H | -1.81514300 | -3.26631900 | 1.17155800  |
| C | -1.04065600 | 2.13221600  | -0.42397400 | C | -1.98581800 | -2.77351400 | 3.31668600  |
| H | -1.67854600 | 1.78204600  | -1.24849800 | H | -2.76362900 | -3.54751600 | 3.26923300  |
| C | -1.14285800 | 3.64042600  | -0.38577600 | H | -1.25552600 | -3.14913500 | 4.04662300  |
| C | -0.05253900 | 4.46325300  | -0.09375400 | C | -2.60562200 | -1.45448500 | 3.79318300  |
| H | 0.92734000  | 4.00850400  | 0.05543000  | H | -2.56141200 | -1.39046200 | 4.89500700  |
| C | -0.20677900 | 5.84517300  | -0.01933500 | H | -3.67100000 | -1.43254300 | 3.53686300  |
| H | 0.65512900  | 6.47273800  | 0.20421300  | C | -1.06849100 | -2.28973400 | -1.38326100 |
| C | -1.45399100 | 6.42462300  | -0.23639300 | H | -0.03117000 | -2.06249300 | -1.65457300 |
| H | -1.57381000 | 7.50529400  | -0.18125200 | H | -1.06635200 | -3.13408500 | -0.68310700 |
| C | -2.54681100 | 5.61177500  | -0.53257700 | C | -1.75904200 | -1.08336900 | -0.85223400 |
| H | -3.52557200 | 6.05594400  | -0.70786500 | H | -1.66632700 | -0.23984300 | -1.54396600 |
| C | -2.39062100 | 4.23193900  | -0.60963100 | C | -2.95317500 | -1.15357700 | -0.06970900 |
| H | -3.24609200 | 3.59047100  | -0.83455000 | H | -3.23643700 | -2.14620300 | 0.28639200  |
| C | 0.82831200  | 2.03604900  | -2.06654100 | O | -1.74619000 | -2.73476100 | -2.59337800 |
| H | 0.41773900  | 3.04827100  | -2.19632900 | C | -0.99810900 | -3.50897900 | -3.37376200 |
| C | 0.17738800  | 1.17670100  | -3.13479500 | O | 0.12781600  | -3.90748500 | -3.15101900 |
| C | -1.04879700 | 1.59135000  | -3.67161200 | O | -1.70997800 | -3.77895100 | -4.48276800 |
| H | -1.46984000 | 2.54708200  | -3.35200900 | C | -1.02383600 | -4.61043200 | -5.41461700 |
| C | -1.73280100 | 0.81214300  | -4.60114300 | H | -0.12381000 | -4.11303500 | -5.79346300 |
| H | -2.69362200 | 1.14868200  | -4.98750200 | H | -1.73136800 | -4.78312000 | -6.22671400 |
| C | -1.18432000 | -0.39062800 | -5.03435300 | H | -0.73027000 | -5.55819500 | -4.95245500 |
| H | -1.71861500 | -1.01659000 | -5.74712400 | C | -4.09784500 | -0.24845500 | -0.20058000 |
| C | 0.05566700  | -0.79407500 | -4.54273400 | C | -5.21219600 | -0.41353900 | 0.65726100  |
| H | 0.50385000  | -1.72623900 | -4.88516900 | C | -4.18903500 | 0.77238500  | -1.15340800 |
| C | 0.72786900  | -0.02393500 | -3.59790200 | C | -6.31639100 | 0.47014300  | 0.56289700  |
| H | 1.68690300  | -0.36537900 | -3.21435000 | C | -5.53365600 | -1.36309800 | 1.67421700  |
| C | 2.33354000  | 2.18158200  | -2.19324500 | C | -5.29537000 | 1.63310500  | -1.22874200 |
| H | 2.72720600  | 2.83235100  | -1.40324800 | H | -3.39581300 | 0.88442600  | -1.89195000 |
| H | 2.87299000  | 1.23252200  | -2.15362500 | C | -6.37470100 | 1.51111400  | -0.36491100 |
| H | 2.55729200  | 2.65033700  | -3.15881600 | C | -6.77344100 | -1.03331100 | 2.15548800  |
| C | -1.95641900 | -0.24182500 | 3.17447700  | H | -4.93608200 | -2.20828000 | 1.99340000  |
| H | -2.57987400 | 0.65666300  | 3.18724100  | H | -5.30942600 | 2.40558200  | -1.99722900 |
| C | -0.53891000 | -0.04296100 | 3.19150300  | H | -7.23257700 | 2.17870900  | -0.42693300 |

|                                |             |             |             |   |             |             |             |
|--------------------------------|-------------|-------------|-------------|---|-------------|-------------|-------------|
| H                              | -7.37864300 | -1.50088500 | 2.92376500  | P | 0.60916500  | 0.36970200  | 0.25833600  |
| N                              | -7.25186600 | 0.07955200  | 1.49656100  | N | -0.22232700 | 1.50174200  | -0.67082900 |
| C                              | -8.52243100 | 0.71816600  | 1.71013000  | C | -1.76134600 | 1.13230200  | 1.23305300  |
| H                              | -9.14259600 | 0.68169900  | 0.80487100  | H | -1.42788500 | 1.89728900  | 1.95318800  |
| H                              | -8.39237000 | 1.76945100  | 1.99751000  | H | -2.83553400 | 0.97888900  | 1.41798500  |
| H                              | -9.05288400 | 0.20276700  | 2.51463900  | C | -1.60360700 | 1.70510900  | -0.18216800 |
| <b>IM2b</b>                    |             |             |             | H | -2.29577400 | 1.16143100  | -0.85098700 |
| <b>Atomic</b>                  |             |             |             | C | -1.99803100 | 3.16548700  | -0.20725900 |
| <b>Coordinates (Angstroms)</b> |             |             |             | C | -1.05841100 | 4.18881900  | -0.05563000 |
| <b>Type</b>                    | <b>X</b>    | <b>Y</b>    | <b>Z</b>    | H | -0.00191800 | 3.92666400  | 0.01594400  |
| Ir                             | -0.75875900 | -0.70742700 | 1.68587600  | C | -1.45929100 | 5.52078100  | -0.01233900 |
| O                              | 1.68628800  | -0.11483500 | -0.92683800 | H | -0.71283500 | 6.30605400  | 0.10079700  |
| O                              | 1.71804600  | 1.17498900  | 1.25099500  | C | -2.80844700 | 5.85093800  | -0.11741300 |
| C                              | 2.83176600  | -0.78697600 | -0.54844900 | H | -3.12218700 | 6.89299800  | -0.08643600 |
| C                              | 2.88461000  | -2.17174900 | -0.80226200 | C | -3.75229900 | 4.83723900  | -0.27049300 |
| H                              | 2.04558000  | -2.65057200 | -1.30662200 | H | -4.81009900 | 5.08472000  | -0.35986500 |
| C                              | 4.00414000  | -2.87651800 | -0.43871800 | C | -3.34928000 | 3.50655000  | -0.31850400 |
| H                              | 4.06481100  | -3.94631100 | -0.63713600 | H | -4.08492000 | 2.71038800  | -0.44311500 |
| C                              | 5.08567400  | -2.23707700 | 0.21351100  | C | 0.01824000  | 1.89374600  | -2.09191500 |
| C                              | 6.21562000  | -2.96767100 | 0.65309000  | H | -0.69548800 | 2.71823300  | -2.23666900 |
| H                              | 6.24091800  | -4.04124500 | 0.46560200  | C | -0.39938000 | 0.79758500  | -3.05806400 |
| C                              | 7.25143900  | -2.34751800 | 1.30964600  | C | -1.74072700 | 0.72836100  | -3.45343200 |
| H                              | 8.11199200  | -2.92333200 | 1.64515200  | H | -2.43018600 | 1.50350000  | -3.11137800 |
| C                              | 7.19005600  | -0.96155700 | 1.55991600  | C | -2.20273800 | -0.30230200 | -4.26899400 |
| H                              | 7.99980800  | -0.47339600 | 2.09935600  | H | -3.25301300 | -0.34045500 | -4.55760500 |
| C                              | 6.11305400  | -0.21897600 | 1.13419200  | C | -1.31988500 | -1.27825200 | -4.72459600 |
| H                              | 6.07551200  | 0.84802200  | 1.34244000  | H | -1.67767100 | -2.09433800 | -5.35105400 |
| C                              | 5.03535400  | -0.82158500 | 0.43730600  | C | 0.02891200  | -1.19025800 | -4.38614700 |
| C                              | 3.89557000  | -0.07794400 | -0.01109900 | H | 0.73593400  | -1.93422300 | -4.74993300 |
| C                              | 3.80710200  | 1.39420200  | 0.10063100  | C | 0.48514700  | -0.16146200 | -3.56595900 |
| C                              | 4.78569200  | 2.26869000  | -0.47593700 | H | 1.53875000  | -0.11522000 | -3.30353500 |
| C                              | 5.85080200  | 1.79583800  | -1.28338300 | C | 1.39443700  | 2.47875000  | -2.35679100 |
| H                              | 5.93318600  | 0.72874900  | -1.47662700 | H | 1.60635000  | 3.29381700  | -1.65523100 |
| C                              | 6.76715200  | 2.66169900  | -1.83456500 | H | 2.20014100  | 1.74571900  | -2.27126300 |
| H                              | 7.56932200  | 2.27023000  | -2.45797300 | H | 1.41845100  | 2.88933700  | -3.37335600 |
| C                              | 6.67247400  | 4.04961400  | -1.60741200 | C | -1.91575400 | -0.86543600 | 3.49070800  |
| H                              | 7.40675200  | 4.72437500  | -2.04337300 | H | -2.85462300 | -0.30567900 | 3.41999200  |
| C                              | 5.64053500  | 4.54503400  | -0.84754300 | C | -0.72351200 | -0.08515400 | 3.70651200  |
| H                              | 5.54111500  | 5.61742900  | -0.67842400 | H | -0.85170900 | 1.00063200  | 3.73477300  |
| C                              | 4.67141800  | 3.68415600  | -0.27939700 | C | 0.46078800  | -0.59200500 | 4.51447500  |
| C                              | 3.58087800  | 4.19562400  | 0.46412300  | H | 0.90208400  | 0.24123300  | 5.07517800  |
| H                              | 3.51349300  | 5.27104500  | 0.62764600  | H | 0.10983000  | -1.30486400 | 5.27400800  |
| C                              | 2.60998500  | 3.35645700  | 0.94720800  | C | 1.53636400  | -1.22573900 | 3.62683800  |
| H                              | 1.75238400  | 3.72663500  | 1.50592000  | H | 2.15402900  | -1.93388000 | 4.20487600  |
| C                              | 2.71506900  | 1.96565800  | 0.73684300  |   |             |             |             |

|   |             |             |             |
|---|-------------|-------------|-------------|
| H | 2.21807000  | -0.44183800 | 3.27255200  |
| C | 0.97362200  | -1.91043900 | 2.40903200  |
| H | 1.69703500  | -2.05206600 | 1.60288800  |
| C | -0.15508300 | -2.74915400 | 2.40056900  |
| H | -0.21973800 | -3.45072300 | 1.56572400  |
| C | -0.88671600 | -3.17886900 | 3.66167000  |
| H | -1.24581100 | -4.20734200 | 3.52590900  |
| H | -0.16869500 | -3.23406300 | 4.49181500  |
| C | -2.06593000 | -2.26804700 | 4.03301800  |
| H | -2.20915500 | -2.26052900 | 5.12844400  |
| H | -2.99361100 | -2.69857500 | 3.62782300  |
| C | -0.88248300 | -2.70685000 | -1.05865900 |
| H | -0.50708400 | -1.83204600 | -1.60925900 |
| H | -0.04592000 | -3.13252600 | -0.49067800 |
| C | -2.05283300 | -2.36786500 | -0.20630500 |
| H | -2.28732900 | -3.03709900 | 0.62301400  |
| C | -2.91712300 | -1.39367300 | -0.57826900 |
| H | -2.66749500 | -0.84821200 | -1.49442700 |
| O | -1.32117700 | -3.69358500 | -2.03942600 |
| C | -0.34601700 | -4.16715300 | -2.81158100 |
| O | 0.84199100  | -3.93400600 | -2.71740300 |
| O | -0.90835000 | -4.96616900 | -3.73257800 |
| C | 0.02868600  | -5.54515200 | -4.63809700 |
| H | 0.52838300  | -4.76952100 | -5.22863100 |
| H | -0.55838900 | -6.19609300 | -5.28688600 |
| H | 0.78859500  | -6.12080400 | -4.10083600 |
| C | -4.14351000 | -0.98015900 | 0.07732100  |
| C | -5.00630700 | -0.05941700 | -0.56280500 |
| C | -4.49570400 | -1.39870600 | 1.36371000  |
| C | -6.14539700 | 0.42840500  | 0.13205600  |
| C | -5.01505800 | 0.55477300  | -1.85012400 |
| C | -5.62710200 | -0.91152800 | 2.02305300  |
| H | -3.83335300 | -2.08605100 | 1.88614000  |
| C | -6.46824000 | 0.02195300  | 1.42449700  |
| C | -6.11138300 | 1.37642500  | -1.89348700 |
| H | -4.30856300 | 0.39413100  | -2.65434800 |
| H | -5.83951900 | -1.25488700 | 3.03431100  |
| H | -7.33774400 | 0.41614300  | 1.94812200  |
| H | -6.47591800 | 2.02014000  | -2.68590200 |
| N | -6.79863500 | 1.31227500  | -0.70084800 |
| C | -7.98767300 | 2.04778500  | -0.35941000 |
| H | -7.80173800 | 2.73656800  | 0.47481400  |
| H | -8.80057600 | 1.36798600  | -0.07541500 |
| H | -8.31067100 | 2.62988700  | -1.22583300 |

| <b>TS1a</b>   |                                |             |             |
|---------------|--------------------------------|-------------|-------------|
| <b>Atomic</b> | <b>Coordinates (Angstroms)</b> |             |             |
| <b>Type</b>   | <b>X</b>                       | <b>Y</b>    | <b>Z</b>    |
| Ir            | -1.14031000                    | -0.91190600 | 0.62993000  |
| O             | 1.93492800                     | 0.12304700  | -0.84570700 |
| O             | 1.73850500                     | 0.19788300  | 1.68550200  |
| C             | 2.80503400                     | -0.95988300 | -0.75570900 |
| C             | 2.61800800                     | -1.99266800 | -1.69194800 |
| H             | 1.85675000                     | -1.86908500 | -2.46978300 |
| C             | 3.44826800                     | -3.08317900 | -1.63469600 |
| H             | 3.33579000                     | -3.89132000 | -2.35683000 |
| C             | 4.45334600                     | -3.18733200 | -0.64286600 |
| C             | 5.26594000                     | -4.34160800 | -0.54328100 |
| H             | 5.10589000                     | -5.14738500 | -1.25947300 |
| C             | 6.22662600                     | -4.45244000 | 0.43276700  |
| H             | 6.84261400                     | -5.34726800 | 0.49821400  |
| C             | 6.40395400                     | -3.40592600 | 1.36021500  |
| H             | 7.14871900                     | -3.50337400 | 2.14807700  |
| C             | 5.64120900                     | -2.26292400 | 1.28323700  |
| H             | 5.78475000                     | -1.46823800 | 2.01216900  |
| C             | 4.65666200                     | -2.10523600 | 0.27607500  |
| C             | 3.83574700                     | -0.93326000 | 0.17085400  |
| C             | 4.04207900                     | 0.26915300  | 1.00920200  |
| C             | 5.29401100                     | 0.96985100  | 1.05417900  |
| C             | 6.39719600                     | 0.61767700  | 0.23618900  |
| H             | 6.29644500                     | -0.21130600 | -0.46012400 |
| C             | 7.58094800                     | 1.31591000  | 0.29739000  |
| H             | 8.40792000                     | 1.02789800  | -0.34897000 |
| C             | 7.73049100                     | 2.40437800  | 1.18018300  |
| H             | 8.67433500                     | 2.94461900  | 1.22290900  |
| C             | 6.67424400                     | 2.79030500  | 1.96878600  |
| H             | 6.76507600                     | 3.64383200  | 2.64057100  |
| C             | 5.43674000                     | 2.10469900  | 1.91930400  |
| C             | 4.33377900                     | 2.53682200  | 2.69321400  |
| H             | 4.45775100                     | 3.39287000  | 3.35559500  |
| C             | 3.12106400                     | 1.90606100  | 2.59044500  |
| H             | 2.25201000                     | 2.22817900  | 3.16050800  |
| C             | 2.98611200                     | 0.79494400  | 1.73722600  |
| P             | 0.79287900                     | 0.33600000  | 0.31643400  |
| N             | 0.38245400                     | 1.92395300  | 0.01350600  |
| C             | -1.64490600                    | 1.10270700  | 1.14653500  |
| H             | -1.33298800                    | 1.26576000  | 2.19045200  |
| H             | -2.73712300                    | 1.19401000  | 1.13108900  |
| C             | -1.04363300                    | 2.20677300  | 0.28925000  |

|   |             |             |             |               |                                |             |             |
|---|-------------|-------------|-------------|---------------|--------------------------------|-------------|-------------|
| H | -1.56908200 | 2.24695300  | -0.68019900 | H             | -2.76619600                    | -4.50472200 | 1.37717500  |
| C | -1.24981100 | 3.54250000  | 0.96516900  | H             | -1.33648800                    | -4.36194800 | 2.36567200  |
| C | -0.41931100 | 3.97021000  | 2.00442200  | C             | -2.74899000                    | -2.71632900 | 2.58705300  |
| H | 0.44381800  | 3.35771300  | 2.27188800  | H             | -2.84749800                    | -3.05710100 | 3.63240100  |
| C | -0.67507300 | 5.16503200  | 2.66842300  | H             | -3.77366600                    | -2.58827600 | 2.21722400  |
| H | -0.01639100 | 5.49100100  | 3.47214700  | C             | -1.02094300                    | -1.20205800 | -1.81687600 |
| C | -1.77141300 | 5.94602200  | 2.30555600  | H             | -0.15095600                    | -0.71388500 | -2.24392900 |
| H | -1.97218800 | 6.88120900  | 2.82538300  | H             | -1.00763000                    | -2.28443700 | -1.82167400 |
| C | -2.60167500 | 5.52986200  | 1.26826300  | C             | -2.13200500                    | -0.47849900 | -1.36168100 |
| H | -3.45380600 | 6.13951800  | 0.97243000  | H             | -2.16833700                    | 0.58643100  | -1.59108700 |
| C | -2.33746800 | 4.33748200  | 0.59998900  | C             | -3.17604800                    | -1.08022700 | -0.61438000 |
| H | -2.97419200 | 4.01711700  | -0.22697600 | H             | -3.26533300                    | -2.16273300 | -0.69364300 |
| C | 1.01682000  | 2.95684000  | -0.87216300 | O             | -1.39121900                    | -1.54603900 | -4.01721200 |
| H | 0.79158100  | 3.89891600  | -0.34941700 | C             | -0.29550700                    | -1.31843100 | -4.58988100 |
| C | 0.29643200  | 3.00598300  | -2.20516200 | O             | 0.84448400                     | -1.14621400 | -4.10676000 |
| C | -0.50542500 | 4.10911700  | -2.51004200 | O             | -0.43432400                    | -1.22697600 | -5.97520300 |
| H | -0.56934100 | 4.93340200  | -1.79696000 | C             | 0.77751800                     | -1.04168000 | -6.67799600 |
| C | -1.23333100 | 4.15545400  | -3.69692300 | H             | 1.28003200                     | -0.10721900 | -6.39326000 |
| H | -1.85672500 | 5.02090400  | -3.91765300 | H             | 0.51010500                     | -1.00920100 | -7.73889000 |
| C | -1.16897800 | 3.09069700  | -4.59073700 | H             | 1.48237800                     | -1.86369300 | -6.49834600 |
| H | -1.74673400 | 3.11383400  | -5.51312800 | C             | -4.40395600                    | -0.40436000 | -0.21416900 |
| C | -0.36554700 | 1.98888500  | -4.30096000 | C             | -5.47459100                    | -1.16373400 | 0.31900600  |
| H | -0.31482100 | 1.15204500  | -4.99479000 | C             | -4.61087400                    | 0.97468400  | -0.34932600 |
| C | 0.36685900  | 1.94674100  | -3.11737200 | C             | -6.66832800                    | -0.50772400 | 0.71794300  |
| H | 0.98608900  | 1.07153800  | -2.91768000 | C             | -5.67794400                    | -2.55832400 | 0.54797500  |
| C | 2.52825400  | 2.89614400  | -1.00478300 | C             | -5.79882900                    | 1.59708800  | 0.05367900  |
| H | 3.01609000  | 2.80387700  | -0.02766000 | H             | -3.83230400                    | 1.58918900  | -0.80036800 |
| H | 2.87068300  | 2.08361000  | -1.64870700 | C             | -6.84650300                    | 0.87051600  | 0.60402000  |
| H | 2.85779500  | 3.83903600  | -1.45558000 | C             | -6.93896300                    | -2.69960200 | 1.06563900  |
| C | -2.07161700 | -1.37195300 | 2.55174900  | H             | -4.99284100                    | -3.37059600 | 0.33441700  |
| H | -2.71903500 | -0.53433800 | 2.82381200  | H             | -5.90105000                    | 2.67328000  | -0.07251200 |
| C | -0.67097800 | -1.18965600 | 2.73515400  | H             | -7.76963100                    | 1.35626500  | 0.91590500  |
| H | -0.35973600 | -0.22267700 | 3.13175100  | H             | -7.47878000                    | -3.58967700 | 1.36729600  |
| C | 0.28856700  | -2.32643900 | 3.04941300  | N             | -7.54433100                    | -1.46738300 | 1.17683100  |
| H | 1.07313400  | -1.94772600 | 3.71485900  | C             | -8.87193800                    | -1.20969500 | 1.66909900  |
| H | -0.24359600 | -3.09652500 | 3.62501800  | H             | -9.34919600                    | -2.15822400 | 1.92685400  |
| C | 0.94572400  | -2.93558800 | 1.80665800  | H             | -9.48252700                    | -0.70942400 | 0.90713400  |
| H | 1.23999500  | -3.98178500 | 1.99482400  | H             | -8.84720900                    | -0.57740100 | 2.56574000  |
| H | 1.87759300  | -2.39994000 | 1.58986300  |               |                                |             |             |
| C | 0.07609400  | -2.87926600 | 0.57969000  | <b>TS1b</b>   |                                |             |             |
| H | 0.60927300  | -2.89386000 | -0.37205000 | <b>Atomic</b> | <b>Coordinates (Angstroms)</b> |             |             |
| C | -1.27931400 | -3.20942800 | 0.56018800  | <b>Type</b>   | <b>X</b>                       | <b>Y</b>    | <b>Z</b>    |
| H | -1.70039100 | -3.45605900 | -0.41491300 | Ir            | -1.36619700                    | -0.66938400 | 0.35500900  |
| C | -2.03149800 | -3.77782300 | 1.74761500  | O             | 1.92144900                     | 0.14103600  | -0.82743200 |
|   |             |             |             | O             | 1.60310700                     | -0.31171500 | 1.65271000  |

|   |             |             |             |   |             |             |             |
|---|-------------|-------------|-------------|---|-------------|-------------|-------------|
| C | 2.56069900  | -1.08313000 | -0.99354100 | C | -0.98856200 | 5.66199900  | 3.47317700  |
| C | 2.23212200  | -1.81544100 | -2.14994700 | H | -1.06043900 | 6.47400500  | 4.19469000  |
| H | 1.54758500  | -1.36933800 | -2.87513100 | C | -1.65107000 | 5.75014100  | 2.25231600  |
| C | 2.82967200  | -3.03504500 | -2.34735100 | H | -2.24116000 | 6.63309800  | 2.01287700  |
| H | 2.60121200  | -3.61513200 | -3.24090900 | C | -1.55004400 | 4.71373900  | 1.32694900  |
| C | 3.73478700  | -3.56921700 | -1.39827800 | H | -2.04725800 | 4.79042200  | 0.35900300  |
| C | 4.29913400  | -4.85685500 | -1.56406800 | C | 1.57442200  | 3.03802800  | 0.00301100  |
| H | 4.02938200  | -5.42791100 | -2.45227200 | H | 1.50587500  | 3.75621500  | 0.83416500  |
| C | 5.15658600  | -5.38300800 | -0.62780400 | C | 1.07081600  | 3.74434200  | -1.23946100 |
| H | 5.58000200  | -6.37583500 | -0.76748200 | C | 0.77931500  | 5.10885900  | -1.17703900 |
| C | 5.47554700  | -4.63737400 | 0.52463000  | H | 0.90154400  | 5.63669100  | -0.22920800 |
| H | 6.13591900  | -5.06285600 | 1.27820200  | C | 0.33233700  | 5.79130300  | -2.30537000 |
| C | 4.95557400  | -3.37694600 | 0.71019400  | H | 0.10936600  | 6.85569600  | -2.24273000 |
| H | 5.20498100  | -2.81827000 | 1.60952000  | C | 0.16071400  | 5.10741100  | -3.50530500 |
| C | 4.08739600  | -2.79359100 | -0.24649500 | H | -0.20163300 | 5.63346300  | -4.38710300 |
| C | 3.52064100  | -1.48584900 | -0.07845000 | C | 0.44514800  | 3.74463800  | -3.57864100 |
| C | 3.90990300  | -0.59359000 | 1.03574500  | H | 0.28931200  | 3.20390100  | -4.51032600 |
| C | 5.27453200  | -0.21627300 | 1.27059100  | C | 0.90450500  | 3.06685600  | -2.45180300 |
| C | 6.32681600  | -0.57374300 | 0.39025700  | H | 1.13178000  | 2.00128800  | -2.52499900 |
| H | 6.09536000  | -1.14755800 | -0.50370800 | C | 3.04405500  | 2.67600700  | -0.12725100 |
| C | 7.62488200  | -0.19362800 | 0.64041600  | H | 3.43224100  | 2.18555300  | 0.77034200  |
| H | 8.41060200  | -0.47519300 | -0.05831800 | H | 3.25552000  | 2.05002600  | -0.99641600 |
| C | 7.94598700  | 0.56291800  | 1.78550500  | H | 3.59356800  | 3.61589500  | -0.25386100 |
| H | 8.97816900  | 0.85032500  | 1.97601800  | C | -2.43783300 | -1.31213200 | 2.15246000  |
| C | 6.94831000  | 0.94940400  | 2.64667200  | H | -3.00329900 | -0.46205800 | 2.54467200  |
| H | 7.17620200  | 1.55296700  | 3.52507400  | C | -1.03106100 | -1.30778700 | 2.39550500  |
| C | 5.59964400  | 0.59049100  | 2.41022900  | H | -0.65051900 | -0.45050800 | 2.95464000  |
| C | 4.56550600  | 1.03162900  | 3.26917600  | C | -0.18913000 | -2.56553100 | 2.56211800  |
| H | 4.82425100  | 1.63251600  | 4.14019800  | H | 0.63436300  | -2.33773700 | 3.24866500  |
| C | 3.25617300  | 0.73594000  | 2.99176300  | H | -0.79152100 | -3.33239200 | 3.06914300  |
| H | 2.44028200  | 1.08827700  | 3.61913300  | C | 0.40564600  | -3.11847200 | 1.25629900  |
| C | 2.94203600  | -0.05121100 | 1.86688200  | H | 0.50325500  | -4.21524300 | 1.31616000  |
| P | 0.76596600  | 0.28896500  | 0.33706300  | H | 1.42423900  | -2.73718100 | 1.13136200  |
| N | 0.63170600  | 1.94360600  | 0.40615500  | C | -0.39404400 | -2.77088300 | 0.02730000  |
| C | -1.65563300 | 1.30588100  | 1.12721700  | H | 0.16094500  | -2.70647400 | -0.91033100 |
| H | -1.53122500 | 1.22549200  | 2.21823800  | C | -1.77001000 | -2.94897700 | -0.03792700 |
| H | -2.69529500 | 1.61689100  | 0.96653600  | H | -2.22397900 | -2.98413200 | -1.02515200 |
| C | -0.75009500 | 2.42943500  | 0.62955700  | C | -2.58790200 | -3.58864200 | 1.06069800  |
| H | -1.12193000 | 2.81472300  | -0.33492700 | H | -3.36141700 | -4.21179900 | 0.59510000  |
| C | -0.79591800 | 3.57636100  | 1.61456600  | H | -1.94743900 | -4.27519100 | 1.62976500  |
| C | -0.13612600 | 3.49457200  | 2.84502600  | C | -3.25212500 | -2.56814300 | 1.98438800  |
| H | 0.46517500  | 2.60900100  | 3.06216700  | H | -3.45268800 | -3.01317100 | 2.97411300  |
| C | -0.22738100 | 4.53078400  | 3.76699300  | H | -4.23152700 | -2.29568800 | 1.57555800  |
| H | 0.29802200  | 4.45943000  | 4.71827500  | C | -1.13640700 | 0.36349900  | -1.93189600 |

|   |             |             |             |   |             |             |             |
|---|-------------|-------------|-------------|---|-------------|-------------|-------------|
| H | -1.25764500 | 1.40925100  | -1.66730200 | H | 3.23933600  | -4.14031600 | -2.82920700 |
| H | -0.20765200 | 0.05447700  | -2.40372800 | C | 4.33841900  | -3.53868000 | -1.06449700 |
| C | -2.18425700 | -0.54465200 | -1.75151000 | C | 5.13082400  | -4.71011000 | -1.00972800 |
| H | -2.10262500 | -1.50311200 | -2.26352100 | H | 4.97984000  | -5.47414600 | -1.77129800 |
| C | -3.28819300 | -0.26364100 | -0.90547100 | C | 6.06318100  | -4.88736200 | -0.01644800 |
| H | -3.43099800 | 0.78926500  | -0.65861600 | H | 6.66565400  | -5.79236100 | 0.01537500  |
| O | -1.32821000 | 1.04922200  | -4.09653000 | C | 6.22773300  | -3.89740800 | 0.97295200  |
| C | -0.25406600 | 0.68865800  | -4.64182600 | H | 6.94881800  | -4.04963700 | 1.77339800  |
| O | 0.67389600  | -0.02304200 | -4.20008000 | C | 5.48406800  | -2.74011600 | 0.94075500  |
| O | -0.11105000 | 1.21646300  | -5.92626300 | H | 5.62076300  | -1.99147500 | 1.71708800  |
| C | 1.10199600  | 0.87646300  | -6.56664400 | C | 4.53140100  | -2.51150100 | -0.08319500 |
| H | 1.97235600  | 1.25182300  | -6.01144900 | C | 3.74233300  | -1.31301400 | -0.14689200 |
| H | 1.06408800  | 1.34385200  | -7.55575100 | C | 3.96651300  | -0.17299400 | 0.77137700  |
| H | 1.21649300  | -0.20952600 | -6.67205400 | C | 5.24274300  | 0.47177700  | 0.90022300  |
| C | -4.49690200 | -1.07021500 | -0.77356200 | C | 6.34528500  | 0.15456400  | 0.06898400  |
| C | -5.49139900 | -0.64963000 | 0.14195700  | H | 6.23066900  | -0.60535400 | -0.70006600 |
| C | -4.74662200 | -2.24386100 | -1.49097100 | C | 7.54972000  | 0.80487800  | 0.20857100  |
| C | -6.66442000 | -1.42813900 | 0.31087200  | H | 8.37790400  | 0.54806200  | -0.44872800 |
| C | -5.58725300 | 0.44438900  | 1.05272800  | C | 7.72049700  | 1.80294600  | 1.18858400  |
| C | -5.91427000 | -2.99740000 | -1.30327900 | H | 8.68147500  | 2.30152500  | 1.29407400  |
| H | -4.02971800 | -2.57355500 | -2.24193200 | C | 6.66571100  | 2.15338500  | 1.99571600  |
| C | -6.89123900 | -2.60946900 | -0.39564700 | H | 6.77648600  | 2.93740400  | 2.74382300  |
| C | -6.77930700 | 0.30731300  | 1.71574300  | C | 5.40692900  | 1.51893000  | 1.86629500  |
| H | -4.87110800 | 1.24429900  | 1.20182800  | C | 4.30546800  | 1.91715300  | 2.66127900  |
| H | -6.06070900 | -3.90057300 | -1.89255700 | H | 4.44877800  | 2.69529900  | 3.40952600  |
| H | -7.79507500 | -3.19919000 | -0.25157800 | C | 3.06883200  | 1.35288700  | 2.47455000  |
| H | -7.23475100 | 0.92894200  | 2.47800400  | H | 2.20187600  | 1.65298600  | 3.05932700  |
| N | -7.43834600 | -0.81966000 | 1.27454000  | C | 2.91766000  | 0.33862000  | 1.51354000  |
| C | -8.71259200 | -1.30095800 | 1.74006900  | C | 1.50383900  | 2.71185700  | -1.18996800 |
| H | -8.61775600 | -2.29449700 | 2.19664800  | H | 1.21483800  | 3.72140500  | -0.86382700 |
| H | -9.43412300 | -1.36437000 | 0.91610200  | C | 1.02455800  | 2.55714100  | -2.62002500 |
| H | -9.10420100 | -0.61029500 | 2.49057000  | C | -0.07190800 | 3.31727300  | -3.04840900 |

**IM3a**

| Atomic Type | Coordinates (Angstroms) |             |             |
|-------------|-------------------------|-------------|-------------|
|             | X                       | Y           | Z           |
| Ir          | -1.29373400             | -0.68083200 | 0.06885500  |
| P           | 0.80644300              | 0.20193700  | -0.02530800 |
| N           | 0.69605400              | 1.84489100  | -0.25589700 |
| O           | 1.63344600              | -0.18369500 | 1.34741200  |
| O           | 1.89197400              | -0.16250300 | -1.18816400 |
| C           | 2.73572100              | -1.26674500 | -1.09802300 |
| C           | 2.55469400              | -2.25656900 | -2.08040000 |
| H           | 1.78893200              | -2.10045100 | -2.83899000 |
| C           | 3.35685500              | -3.36888700 | -2.06976000 |

|   |             |            |             |
|---|-------------|------------|-------------|
| H | -0.49875200 | 4.06060000 | -2.37243800 |
| C | -0.60235400 | 3.16089800 | -4.32640600 |
| H | -1.45315000 | 3.76372900 | -4.63811400 |
| C | -0.02864500 | 2.24942400 | -5.20839500 |
| H | -0.43524900 | 2.12625800 | -6.21020000 |
| C | 1.08847700  | 1.51705200 | -4.81070200 |
| H | 1.56232100  | 0.82708500 | -5.50683400 |
| C | 1.61240700  | 1.67079800 | -3.52996600 |
| H | 2.48971200  | 1.09754300 | -3.23874200 |
| C | 3.00308200  | 2.61284400 | -0.98960300 |
| H | 3.26317800  | 2.75996400 | 0.06527500  |
| H | 3.43005700  | 1.66037700 | -1.31445200 |

|   |             |             |             |   |             |             |             |
|---|-------------|-------------|-------------|---|-------------|-------------|-------------|
| H | 3.48600100  | 3.40644000  | -1.57024000 | C | -4.86492200 | -0.05684500 | -0.40982300 |
| C | -0.65588200 | 2.35909300  | 0.04294100  | C | -5.94363700 | -0.94899600 | -0.17784300 |
| H | -1.17437100 | 2.51001900  | -0.91976600 | C | -5.03760300 | 1.27934800  | -0.01421700 |
| C | -1.42156100 | 1.31857600  | 0.85074400  | C | -7.12692400 | -0.46211700 | 0.44259800  |
| H | -1.05367000 | 1.32297600  | 1.88929900  | C | -6.16096800 | -2.33017800 | -0.44647600 |
| H | -2.48363600 | 1.59125600  | 0.89802400  | C | -6.21210700 | 1.72753100  | 0.59417000  |
| C | -0.61787000 | 3.68678100  | 0.76376100  | H | -4.24301100 | 2.00174500  | -0.19519500 |
| C | 0.40264400  | 3.99829900  | 1.66602600  | C | -7.27656000 | 0.86395700  | 0.83632200  |
| H | 1.22482200  | 3.29441600  | 1.80168400  | C | -7.42292500 | -2.62868900 | 0.00465800  |
| C | 0.38749800  | 5.20355700  | 2.35954500  | H | -5.49106100 | -3.02929900 | -0.93366200 |
| H | 1.19350700  | 5.43921300  | 3.05229000  | H | -6.29650400 | 2.77314500  | 0.88039900  |
| C | -0.65019600 | 6.11192300  | 2.16300500  | H | -8.19085400 | 1.21968000  | 1.30767400  |
| H | -0.66003800 | 7.05621400  | 2.70329500  | H | -7.96919600 | -3.56436400 | -0.01774700 |
| C | -1.66931700 | 5.81170500  | 1.26247000  | N | -8.01210000 | -1.51161300 | 0.54370000  |
| H | -2.47623500 | 6.52229500  | 1.09459500  | C | -9.34014100 | -1.43204800 | 1.10461600  |
| C | -1.64928900 | 4.60758200  | 0.56441900  | H | -9.81056900 | -2.41570600 | 1.04789300  |
| H | -2.44237600 | 4.37743100  | -0.15099600 | H | -9.95714400 | -0.71802400 | 0.54708500  |
| C | -1.40122800 | -0.30221500 | -2.07095800 | H | -9.30290400 | -1.12291000 | 2.15546500  |

**IM3b**

|    | <b>Coordinates (Angstroms)</b> |             |             |
|----|--------------------------------|-------------|-------------|
|    | <b>X</b>                       | <b>Y</b>    | <b>Z</b>    |
| Ir | -1.36518400                    | -0.60937000 | -0.03628800 |
| O  | 1.88141300                     | -0.13194200 | -1.19456100 |
| O  | 1.54429600                     | -0.11770400 | 1.32753500  |
| C  | 2.68377500                     | -1.26441100 | -1.07415800 |
| C  | 2.49370300                     | -2.25951500 | -2.04963200 |
| H  | 1.75524200                     | -2.08879600 | -2.83116300 |
| C  | 3.25297500                     | -3.40064200 | -2.00403900 |
| H  | 3.12723200                     | -4.17652400 | -2.75764000 |
| C  | 4.19956900                     | -3.59453700 | -0.97030200 |
| C  | 4.94326700                     | -4.79551800 | -0.87952700 |
| H  | 4.78445000                     | -5.56182800 | -1.63720400 |
| C  | 5.83764700                     | -4.99735600 | 0.14304900  |
| H  | 6.40246100                     | -5.92505700 | 0.20318300  |
| C  | 6.01116500                     | -4.00282400 | 1.12629600  |
| H  | 6.70078300                     | -4.17412300 | 1.95033700  |
| C  | 5.31538500                     | -2.81771500 | 1.05958500  |
| H  | 5.45828700                     | -2.06757500 | 1.83314100  |
| C  | 4.40339000                     | -2.56338400 | 0.00474800  |
| C  | 3.66095000                     | -1.33715500 | -0.09451300 |
| C  | 3.89479100                     | -0.20060600 | 0.82490400  |
| C  | 5.18961800                     | 0.39509400  | 0.99591900  |
| C  | 6.30405900                     | 0.03906200  | 0.19718600  |
| H  | 6.18394300                     | -0.71379300 | -0.57794900 |



|   |             |            |             |   |             |             |             |
|---|-------------|------------|-------------|---|-------------|-------------|-------------|
| C | 7.52742300  | 0.64320000 | 0.37580000  | H | 3.24862900  | 2.73788200  | 0.12740900  |
| H | 8.36469400  | 0.35822600 | -0.25785000 | H | 3.44710000  | 1.67125600  | -1.27572600 |
| C | 7.70592100  | 1.63044100 | 1.36537400  | H | 3.54853900  | 3.42122100  | -1.47933000 |
| H | 8.68105300  | 2.09254500 | 1.50143700  | C | -2.43416900 | -1.16214300 | 1.83989000  |
| C | 6.64135100  | 2.01649200 | 2.14308000  | H | -2.98384700 | -0.27306700 | 2.16038800  |
| H | 6.75889900  | 2.79248400 | 2.89844100  | C | -1.04000700 | -1.16477400 | 2.07255900  |
| C | 5.36426000  | 1.43075400 | 1.97226900  | H | -0.64194000 | -0.27603800 | 2.56281700  |
| C | 4.25514300  | 1.86479600 | 2.73714500  | C | -0.20888000 | -2.41824500 | 2.29238100  |
| H | 4.40498300  | 2.63078900 | 3.49649600  | H | 0.61442900  | -2.16572100 | 2.96915300  |
| C | 3.00431500  | 1.35078100 | 2.50732800  | H | -0.81764800 | -3.15513400 | 2.83245800  |
| H | 2.13211700  | 1.67934500 | 3.06836400  | C | 0.38677900  | -3.03583000 | 1.01762700  |
| C | 2.84170900  | 0.35120600 | 1.53239500  | H | 0.51002900  | -4.12339400 | 1.14461600  |
| P | 0.75913100  | 0.25609000 | -0.07409000 | H | 1.39784900  | -2.64325200 | 0.86378800  |
| N | 0.66372800  | 1.89421600 | -0.33131400 | C | -0.42387200 | -2.79010700 | -0.22688800 |
| C | -1.53831900 | 1.42464400 | 0.64208600  | H | 0.13153700  | -2.76784900 | -1.16640100 |
| H | -1.25851000 | 1.42917400 | 1.70759100  | C | -1.79265300 | -2.97073800 | -0.28850500 |
| H | -2.58605000 | 1.74676000 | 0.60616100  | H | -2.23587200 | -3.06215000 | -1.27792300 |
| C | -0.68021800 | 2.45175400 | -0.08631000 | C | -2.63181900 | -3.49650400 | 0.85304700  |
| H | -1.14056400 | 2.67169100 | -1.06495500 | H | -3.42350100 | -4.12913200 | 0.43429700  |
| C | -0.63134400 | 3.74547400 | 0.69595300  | H | -2.01163700 | -4.16067000 | 1.46795200  |
| C | 0.34762000  | 3.97434800 | 1.66616900  | C | -3.27363600 | -2.40325800 | 1.71102500  |
| H | 1.13653400  | 3.23508600 | 1.80843900  | H | -3.49532300 | -2.79136300 | 2.71857800  |
| C | 0.33453100  | 5.14237200 | 2.42113000  | H | -4.24414600 | -2.12999100 | 1.28313800  |
| H | 1.10825600  | 5.31242000 | 3.16770500  | C | -1.31956700 | 0.03602100  | -2.14705800 |
| C | -0.66140700 | 6.09519300 | 2.21924800  | H | -1.27256500 | 1.12462700  | -2.17957100 |
| H | -0.67095700 | 7.00951300 | 2.80866700  | H | -0.59539300 | -0.44071800 | -2.80817800 |
| C | -1.63787200 | 5.87809300 | 1.24999400  | C | -2.57288600 | -0.61495500 | -1.98839200 |
| H | -2.41144100 | 6.62384500 | 1.07806100  | H | -2.68492100 | -1.60215400 | -2.43302500 |
| C | -1.61892600 | 4.71171500 | 0.49013900  | C | -3.58179100 | -0.14689100 | -1.13965000 |
| H | -2.37921600 | 4.54650100 | -0.27608200 | H | -3.54738100 | 0.90511000  | -0.86274400 |
| C | 1.54043400  | 2.76376700 | -1.19947000 | C | -4.81376800 | -0.84234400 | -0.82817200 |
| H | 1.26314100  | 3.77139800 | -0.85756300 | C | -5.72919200 | -0.24596200 | 0.07255700  |
| C | 1.12575000  | 2.66392600 | -2.65323400 | C | -5.13671100 | -2.10742200 | -1.33679300 |
| C | 0.11764200  | 3.51433000 | -3.12503300 | C | -6.91949200 | -0.94368800 | 0.41831400  |
| H | -0.29379700 | 4.27202800 | -2.45518700 | C | -5.74658400 | 0.98213300  | 0.79216600  |
| C | -0.34507900 | 3.42526900 | -4.43535100 | C | -6.31204000 | -2.77287800 | -0.97591400 |
| H | -1.12642600 | 4.09880700 | -4.78237000 | H | -4.46755800 | -2.58971700 | -2.04834300 |
| C | 0.20830900  | 2.48870300 | -5.30332100 | C | -7.22166200 | -2.20537100 | -0.08806800 |
| H | -0.14398200 | 2.41877600 | -6.33054800 | C | -6.91203200 | 0.99880300  | 1.51678600  |
| C | 1.23794200  | 1.66141500 | -4.85805200 | H | -5.01020500 | 1.77758200  | 0.77252600  |
| H | 1.69777300  | 0.95019100 | -5.54223400 | H | -6.52230100 | -3.75042600 | -1.40372700 |
| C | 1.69470600  | 1.74902300 | -3.54627600 | H | -8.13439800 | -2.72923000 | 0.18992100  |
| H | 2.50838100  | 1.10614700 | -3.21748200 | H | -7.30934500 | 1.75497800  | 2.18358500  |
| C | 3.02718200  | 2.62301300 | -0.93988900 | N | -7.62466700 | -0.15664400 | 1.30045300  |

|                                |             |             |             |    |             |             |             |
|--------------------------------|-------------|-------------|-------------|----|-------------|-------------|-------------|
| C                              | -8.90008400 | -0.49582900 | 1.88511700  | H  | 2.23227400  | -5.82590300 | -2.08316300 |
| H                              | -8.82381500 | -1.40421400 | 2.49398800  | C  | -2.43057800 | -1.43199800 | -1.60608400 |
| H                              | -9.65520500 | -0.65475500 | 1.10682100  | C  | -3.09458600 | -0.30775600 | -2.11196700 |
| H                              | -9.22907600 | 0.32530700  | 2.52515000  | C  | -3.00599100 | -2.69937100 | -1.76634800 |
| <b>IM4</b>                     |             |             |             | C  | -4.32977200 | -0.45123400 | -2.74069200 |
| <b>Atomic</b>                  |             |             |             | H  | -2.62948900 | 0.67507400  | -2.01934100 |
| <b>Coordinates (Angstroms)</b> |             |             |             | C  | -4.23849400 | -2.83743800 | -2.39683300 |
| <b>Type</b>                    | <b>X</b>    | <b>Y</b>    | <b>Z</b>    | H  | -2.47822000 | -3.58196700 | -1.40203900 |
| C                              | -0.60290200 | -0.92265000 | 2.15262000  | C  | -4.90517400 | -1.71212300 | -2.87953500 |
| C                              | -1.25243800 | -1.39534600 | 3.34032100  | H  | -4.84022500 | 0.42791100  | -3.13223200 |
| H                              | -0.97409500 | -1.12337800 | 4.35255800  | H  | -4.67783600 | -3.82637100 | -2.51747300 |
| C                              | -2.34861800 | -2.21282000 | 2.94883800  | H  | -5.86855600 | -1.82183800 | -3.37489700 |
| H                              | -3.06578400 | -2.67462800 | 3.61934100  | Cu | 0.17225600  | 0.75266500  | -0.79474700 |
| C                              | -1.30921400 | -1.46497200 | 1.00647800  | O  | -1.14702400 | 2.24510500  | -1.56291400 |
| C                              | -2.38127600 | -2.26593700 | 1.52584800  | C  | -0.46510700 | 3.07211200  | -2.22808100 |
| H                              | -3.12026300 | -2.78184000 | 0.92057100  | O  | -1.08914800 | 4.13883600  | -2.80448500 |
| C                              | 1.87148800  | 1.72925500  | 1.73448800  | C  | 0.92984600  | 3.01133600  | -2.42050800 |
| C                              | 2.36179300  | 0.93558400  | 2.94672000  | N  | 1.54512300  | 1.94764700  | -1.83230100 |
| H                              | 2.54889800  | 1.53866300  | 3.84064800  | C  | 2.85917700  | 1.86593000  | -1.75908900 |
| N                              | 0.78249100  | 0.88274200  | 1.21311700  | H  | 3.47867600  | 2.69984400  | -2.10793900 |
| C                              | 0.49398900  | 0.03197100  | 2.14105500  | C  | 3.55168100  | 0.74482000  | -1.17070700 |
| O                              | 1.26191500  | 0.04314900  | 3.25279100  | C  | 4.85803100  | 0.90986200  | -0.66756100 |
| H                              | 3.24063400  | 0.31376400  | 2.73547600  | C  | 2.97114800  | -0.53332800 | -1.04794800 |
| H                              | 2.64984700  | 1.81907800  | 0.96470700  | C  | 5.52560200  | -0.12097000 | -0.02049100 |
| C                              | 1.37059000  | 3.13583600  | 2.10189000  | H  | 5.34435000  | 1.88134300  | -0.76650900 |
| C                              | 0.58157900  | 3.78264800  | 0.97476800  | C  | 3.62295300  | -1.57360200 | -0.40260200 |
| C                              | 2.55453300  | 4.01227600  | 2.49173800  | H  | 1.99591100  | -0.71459900 | -1.49667400 |
| H                              | 0.70846500  | 3.02151000  | 2.98035400  | C  | 4.89542500  | -1.35618800 | 0.12298000  |
| H                              | -0.27915500 | 3.17776800  | 0.66621400  | H  | 6.52691700  | 0.02717800  | 0.37757100  |
| H                              | 0.21625000  | 4.77235100  | 1.27658700  | H  | 3.15749900  | -2.55485300 | -0.32786700 |
| H                              | 1.21374300  | 3.91791100  | 0.08681900  | C  | -2.48421700 | 4.21600600  | -2.56406000 |
| H                              | 3.14697400  | 3.58933000  | 3.31311900  | H  | -3.01333400 | 3.35805800  | -2.99794700 |
| H                              | 3.22740700  | 4.14350700  | 1.63237200  | H  | -2.70282100 | 4.24937100  | -1.48976900 |
| H                              | 2.22275800  | 5.00860500  | 2.80550700  | H  | -2.81608800 | 5.13872700  | -3.04465500 |
| P                              | -0.84229200 | -1.19263400 | -0.72729300 | C  | -2.96892400 | 1.30990500  | 1.05533000  |
| C                              | 0.07974800  | -2.72798300 | -1.12286700 | C  | -2.53779800 | 1.67028500  | 2.36646300  |
| C                              | 0.58804800  | -2.87091600 | -2.42279300 | H  | -1.65316700 | 2.25592900  | 2.60019800  |
| C                              | 0.36536800  | -3.71648400 | -0.17412600 | C  | -3.41349000 | 1.05748100  | 3.31125200  |
| C                              | 1.35012200  | -3.98080900 | -2.76770400 | H  | -3.32417700 | 1.10872100  | 4.39132000  |
| H                              | 0.39113400  | -2.09547100 | -3.16521100 | C  | -4.11583700 | 0.46685200  | 1.19084300  |
| C                              | 1.13382100  | -4.82668100 | -0.52164300 | H  | -4.64596300 | -0.01931200 | 0.37745500  |
| H                              | -0.01253100 | -3.62143700 | 0.84322600  | C  | -4.39127100 | 0.31328200  | 2.58387100  |
| C                              | 1.62682000  | -4.96190900 | -1.81605200 | H  | -5.17486100 | -0.30065300 | 3.01601400  |
| H                              | 1.73958500  | -4.07542300 | -3.77982200 | H  | -2.47427500 | 1.59276500  | 0.12866700  |
| H                              | 1.34884900  | -5.58730400 | 0.22711000  |    |             |             |             |

|    |             |             |             |   |             |             |            |
|----|-------------|-------------|-------------|---|-------------|-------------|------------|
| C  | 1.70429300  | 4.07962000  | -3.11043000 | H | 0.28480700  | -2.34174800 | 6.04717800 |
| H  | 1.04027300  | 4.79144900  | -3.60504900 | H | -3.60368300 | -2.11883700 | 4.22312400 |
| H  | 2.34201400  | 4.65034300  | -2.41245500 | H | -2.16997000 | -2.68998400 | 6.17162500 |
| H  | 2.38444300  | 3.65890100  | -3.86712400 | C | 1.63860900  | 0.22248900  | 1.87052600 |
| Fe | -2.52534100 | -0.34839200 | 2.14526500  | C | 1.46857600  | 1.55211000  | 2.28433500 |
| Cl | 5.72178100  | -2.65702600 | 0.95302100  | C | 2.93113200  | -0.31109500 | 1.84406200 |

**IM4'**

| Atomic Type | Coordinates (Angstroms) |             |             |
|-------------|-------------------------|-------------|-------------|
|             | X                       | Y           | Z           |
| C           | -0.09168000             | -2.70290400 | -0.66875100 |
| C           | 0.40204500              | -4.02628000 | -0.92834900 |
| H           | 0.11301600              | -4.64071000 | -1.77279100 |
| C           | 1.36845600              | -4.34243500 | 0.06155100  |
| H           | 1.95470200              | -5.25407800 | 0.10905400  |
| C           | 0.58848700              | -2.19135200 | 0.51304800  |
| C           | 1.47555400              | -3.23397900 | 0.94661400  |
| H           | 2.12531600              | -3.18183000 | 1.81450800  |
| C           | -2.40498900             | -0.68748800 | -2.67494900 |
| C           | -2.40875100             | -2.07766700 | -3.32171400 |
| H           | -1.91819400             | -2.07995100 | -4.30680000 |
| N           | -1.35811800             | -0.79643100 | -1.64032200 |
| C           | -1.02995300             | -2.04331900 | -1.56462000 |
| O           | -1.61811100             | -2.89575300 | -2.44139600 |
| H           | -3.39463400             | -2.54107400 | -3.41633800 |
| H           | -3.35011600             | -0.48557400 | -2.14319200 |
| C           | -2.17670400             | 0.42808200  | -3.69630500 |
| C           | -2.11480800             | 1.80187600  | -3.05254000 |
| C           | -3.28037500             | 0.37959700  | -4.74905000 |
| H           | -1.21103100             | 0.22163000  | -4.19207900 |
| H           | -1.27237200             | 1.89500500  | -2.36172900 |
| H           | -2.01177800             | 2.58385000  | -3.81477700 |
| H           | -3.02771700             | 2.01053400  | -2.47632600 |
| H           | -3.32244100             | -0.58131100 | -5.27862000 |
| H           | -4.26326500             | 0.54687900  | -4.28700000 |
| H           | -3.13654300             | 1.16128300  | -5.50331100 |
| P           | 0.11432300              | -0.64142100 | 1.34940400  |
| C           | -0.56894400             | -1.28230200 | 2.92573300  |
| C           | 0.23205300              | -1.59863800 | 4.02863000  |
| C           | -1.95484000             | -1.46808900 | 3.00480100  |
| C           | -0.34367500             | -2.10307000 | 5.19060200  |
| H           | 1.30942900              | -1.43393600 | 3.98108100  |
| C           | -2.52485000             | -1.98027700 | 4.16707200  |
| H           | -2.58086500             | -1.18812800 | 2.15451800  |
| C           | -1.72181200             | -2.29827600 | 5.25981900  |

|    |             |             |             |
|----|-------------|-------------|-------------|
| H  | 0.28480700  | -2.34174800 | 6.04717800  |
| H  | -3.60368300 | -2.11883700 | 4.22312400  |
| H  | -2.16997000 | -2.68998400 | 6.17162500  |
| C  | 1.63860900  | 0.22248900  | 1.87052600  |
| C  | 1.46857600  | 1.55211000  | 2.28433500  |
| C  | 2.93113200  | -0.31109500 | 1.84406200  |
| C  | 2.56267400  | 2.32855300  | 2.64744000  |
| H  | 0.46785300  | 1.98865600  | 2.28232200  |
| C  | 4.02924200  | 0.47443500  | 2.18958100  |
| H  | 3.09270800  | -1.33309200 | 1.50727700  |
| C  | 3.84858300  | 1.79496600  | 2.58941500  |
| H  | 2.41103900  | 3.36489900  | 2.94397500  |
| H  | 5.03125400  | 0.04994700  | 2.13875500  |
| H  | 4.70889400  | 2.41153900  | 2.84346700  |
| Cu | -1.31555100 | 0.41923400  | 0.10377900  |
| O  | -3.41830000 | 0.09837900  | 0.35859200  |
| C  | -3.94001800 | 1.23535400  | 0.51018100  |
| O  | -5.27834100 | 1.32923800  | 0.76953100  |
| C  | -3.26210300 | 2.47148200  | 0.43285500  |
| N  | -1.92871100 | 2.38907500  | 0.16035700  |
| C  | -1.17538000 | 3.47054800  | 0.12140600  |
| H  | -1.61459700 | 4.43827500  | 0.38587400  |
| C  | 0.22413600  | 3.50257900  | -0.21685000 |
| C  | 0.95588600  | 4.66785000  | 0.09936000  |
| C  | 0.92787500  | 2.46202200  | -0.86247700 |
| C  | 2.31322500  | 4.78010000  | -0.15543400 |
| H  | 0.43561300  | 5.49609100  | 0.58158900  |
| C  | 2.28271700  | 2.57133700  | -1.14191600 |
| H  | 0.39994000  | 1.54992700  | -1.15054400 |
| C  | 2.97596400  | 3.72008100  | -0.77002100 |
| H  | 2.86038800  | 5.67929500  | 0.11789000  |
| H  | 2.80810800  | 1.77761300  | -1.66738100 |
| C  | -5.95141300 | 0.08895700  | 0.89601500  |
| H  | -5.91945400 | -0.48435900 | -0.03830500 |
| H  | -5.50986600 | -0.52521000 | 1.69027900  |
| H  | -6.98517000 | 0.33808900  | 1.14493300  |
| C  | 3.03315000  | -1.01096700 | -1.33761300 |
| C  | 2.16683500  | -1.28608200 | -2.43478300 |
| H  | 1.37471400  | -0.63336700 | -2.79392300 |
| C  | 2.45345700  | -2.60480700 | -2.90373500 |
| H  | 1.93109400  | -3.12545900 | -3.69993700 |
| C  | 3.85251000  | -2.15757600 | -1.11997300 |
| H  | 4.59317600  | -2.27114700 | -0.33456800 |
| C  | 3.49688300  | -3.14361800 | -2.08940100 |

|    |             |             |             |   |             |            |             |
|----|-------------|-------------|-------------|---|-------------|------------|-------------|
| H  | 3.91565100  | -4.14141000 | -2.16801700 | H | -6.60361300 | 1.43303000 | -1.75357800 |
| H  | 3.02466200  | -0.11335200 | -0.73001000 | C | -5.75928600 | 0.52734900 | -4.92161100 |
| C  | -3.94089900 | 3.78317200  | 0.62643300  | H | -3.74974100 | 0.49653500 | -5.70448800 |
| H  | -5.01564800 | 3.65117500  | 0.76454800  | H | -7.63413000 | 0.66531300 | -3.86414800 |
| H  | -3.55535800 | 4.32851100  | 1.50333600  | H | -6.21577400 | 0.20185500 | -5.85427000 |
| H  | -3.78475400 | 4.44857000  | -0.23842100 | C | -2.40153900 | 2.88377400 | -1.34384100 |
| Cl | 4.69173500  | 3.83229700  | -1.08340700 | C | -1.27412000 | 2.84552100 | -0.51443900 |
| Fe | 1.88409300  | -2.65301400 | -0.96631000 | C | -2.38980600 | 3.72712100 | -2.46450700 |

**TS2**

| Atomic Type | Coordinates (Angstroms) |             |             |    |             |             |             |
|-------------|-------------------------|-------------|-------------|----|-------------|-------------|-------------|
|             | X                       | Y           | Z           |    |             |             |             |
| C           | -6.07715700             | 2.75587200  | 0.72824400  | H  | -1.26069100 | 2.17665000  | 0.34533800  |
| C           | -6.84849800             | 3.95194900  | 0.91443000  | C  | -1.27196700 | 4.50523300  | -2.75040500 |
| H           | -7.66034800             | 4.06454200  | 1.62437500  | H  | -3.25331700 | 3.75935000  | -3.12868200 |
| C           | -6.31902800             | 4.95666600  | 0.06111900  | C  | -0.15525200 | 4.46238900  | -1.91577400 |
| H           | -6.65396200             | 5.98707100  | 0.01157000  | H  | 0.70920200  | 3.58929100  | -0.14328600 |
| C           | -5.05564900             | 3.03249500  | -0.26800900 | H  | -1.27191800 | 5.14620500  | -3.62984300 |
| C           | -5.23230800             | 4.39867800  | -0.66864100 | H  | 0.72220100  | 5.06567800  | -2.14497800 |
| H           | -4.60097800             | 4.92660500  | -1.37645500 | Cu | -3.63925700 | 0.29899400  | 0.64978100  |
| C           | -6.02675000             | -0.31035500 | 2.71729600  | O  | -1.81361800 | 0.61856200  | 1.77719500  |
| C           | -7.50845100             | 0.05682000  | 2.60677600  | C  | -1.41617700 | -0.46470600 | 2.23401800  |
| H           | -8.03079100             | 0.12651500  | 3.56512800  | O  | -0.51394400 | -0.50976200 | 3.22013000  |
| N           | -5.38677900             | 0.63070800  | 1.77722000  | C  | -1.86321800 | -1.76647000 | 1.74735900  |
| C           | -6.26334800             | 1.54375000  | 1.50671600  | N  | -3.12833600 | -1.67951500 | 1.15043300  |
| O           | -7.49784300             | 1.38365100  | 2.02469800  | C  | -3.82080000 | -2.77439900 | 0.99109000  |
| H           | -8.07515400             | -0.59311200 | 1.92896600  | H  | -3.43395800 | -3.72051000 | 1.38786300  |
| H           | -5.83522800             | -1.33789000 | 2.37485800  | C  | -5.08712700 | -2.89855800 | 0.30247200  |
| C           | -5.48735700             | -0.15689300 | 4.14930300  | C  | -5.72720300 | -4.15169700 | 0.35131200  |
| C           | -3.96933700             | -0.17971100 | 4.19662400  | C  | -5.70846200 | -1.87054700 | -0.43098100 |
| C           | -6.06919900             | -1.24898300 | 5.03795600  | C  | -6.93869200 | -4.37641900 | -0.28318500 |
| H           | -5.83573900             | 0.82475400  | 4.51871000  | H  | -5.25045200 | -4.96607700 | 0.89742900  |
| H           | -3.53239500             | 0.61387000  | 3.58034600  | C  | -6.92210800 | -2.08021900 | -1.07022900 |
| H           | -3.60560500             | -0.06063000 | 5.22455600  | H  | -5.21780500 | -0.89967400 | -0.52278600 |
| H           | -3.58762300             | -1.14025600 | 3.82117100  | C  | -7.53093100 | -3.33228000 | -0.99395900 |
| H           | -7.16616200             | -1.25891000 | 5.04093500  | H  | -7.42398600 | -5.34785700 | -0.23678600 |
| H           | -5.73183000             | -2.23870800 | 4.69937100  | H  | -7.38755300 | -1.28393700 | -1.64757000 |
| H           | -5.74228700             | -1.12793000 | 6.07649400  | C  | -0.05999500 | 0.76597200  | 3.68562400  |
| P           | -3.84245600             | 1.84334500  | -0.90919300 | H  | 0.51864500  | 1.27414200  | 2.90458200  |
| C           | -4.58397800             | 1.39458700  | -2.52421400 | H  | -0.90995900 | 1.39338900  | 3.97203900  |
| C           | -3.79436100             | 1.11978500  | -3.64858000 | H  | 0.57994400  | 0.54982400  | 4.53977500  |
| C           | -5.97134600             | 1.21571400  | -2.61630000 | C  | -3.15101400 | 3.72094400  | 2.25638000  |
| C           | -4.37871300             | 0.69679600  | -4.83905200 | C  | -4.22745900 | 3.77564700  | 3.19084000  |
| H           | -2.71341600             | 1.25111700  | -3.59829900 | H  | -4.60117900 | 2.93874500  | 3.77418300  |
| C           | -6.55355200             | 0.78557100  | -3.80543300 | C  | -4.77466900 | 5.09153900  | 3.16537000  |
|             |                         |             |             | H  | -5.63047500 | 5.43708600  | 3.73522600  |
|             |                         |             |             | C  | -3.03257400 | 5.01012600  | 1.64870100  |

|    |             |             |             |   |             |             |             |
|----|-------------|-------------|-------------|---|-------------|-------------|-------------|
| H  | -2.33751700 | 5.27871600  | 0.85836700  | C | 7.72482100  | -0.91960900 | -1.25490400 |
| C  | -4.03613300 | 5.85543800  | 2.21281200  | H | 7.42304800  | -1.87668200 | -1.67545600 |
| H  | -4.23318800 | 6.88505300  | 1.93405500  | C | 6.73496600  | 0.05142200  | -1.01445800 |
| H  | -2.56970600 | 2.83398100  | 2.01926000  | C | 3.92710300  | -2.96451600 | 0.77347900  |
| C  | -1.47314900 | -2.97130900 | 2.54972700  | H | 3.14454100  | -2.90484600 | 1.55277500  |
| H  | -1.45923300 | -3.88160400 | 1.93938700  | C | 4.68007900  | -4.25733700 | 0.97199000  |
| H  | -0.47563000 | -2.83681300 | 2.97657300  | C | 5.96385000  | -4.44794400 | 0.45201400  |
| H  | -2.17174200 | -3.14506500 | 3.38251800  | H | 6.46201300  | -3.61452800 | -0.04619000 |
| Fe | -4.87463500 | 4.23899200  | 1.31910600  | C | 6.60274700  | -5.67618600 | 0.58552100  |
| Cl | -9.02992200 | -3.60820700 | -1.82886500 | H | 7.60434400  | -5.81205800 | 0.18110300  |
| Ir | 2.27438000  | -1.07649100 | -1.02709200 | C | 5.96595600  | -6.73180400 | 1.23643000  |
| P  | 4.31311500  | -0.54392700 | -0.11835100 | H | 6.46816100  | -7.69142600 | 1.34138800  |
| O  | 4.63568000  | 0.74972100  | 0.86250000  | C | 4.68800900  | -6.55099700 | 1.75827700  |
| O  | 5.42747200  | -0.28770800 | -1.32590700 | H | 4.18740600  | -7.36827700 | 2.27406900  |
| N  | 4.79882500  | -1.77457800 | 0.91102200  | C | 4.05341000  | -5.31866200 | 1.62860200  |
| C  | 4.79280100  | 2.01088000  | 0.30710900  | H | 3.05121100  | -5.17104400 | 2.03901400  |
| C  | 3.78030900  | 2.95340200  | 0.56942300  | C | 3.25132200  | -2.93832800 | -0.58810300 |
| H  | 2.94262000  | 2.64827100  | 1.19665500  | H | 3.99873800  | -3.16077600 | -1.36765700 |
| C  | 3.87690300  | 4.21596100  | 0.04150600  | H | 2.50435300  | -3.74115900 | -0.63286800 |
| H  | 3.10749500  | 4.96129400  | 0.24384600  | C | 5.48561300  | -1.66309400 | 2.23946300  |
| C  | 4.97198800  | 4.57044200  | -0.78295000 | H | 5.77246900  | -2.70488100 | 2.44210500  |
| C  | 5.05304800  | 5.84813600  | -1.38735600 | C | 4.52394000  | -1.26654900 | 3.34457300  |
| H  | 4.25760000  | 6.56665500  | -1.18975100 | C | 3.76577500  | -2.26455500 | 3.97074100  |
| C  | 6.10371700  | 6.17742500  | -2.20929900 | H | 3.90965600  | -3.30428800 | 3.66959400  |
| H  | 6.15350500  | 7.16254100  | -2.66848500 | C | 2.86695600  | -1.95716000 | 4.98842700  |
| C  | 7.11437300  | 5.22956300  | -2.46644700 | H | 2.29614800  | -2.75101500 | 5.46719700  |
| H  | 7.93491500  | 5.48387700  | -3.13439400 | C | 2.73363400  | -0.64009300 | 5.41820600  |
| C  | 7.07272600  | 3.98367500  | -1.88539600 | H | 2.05827000  | -0.39818300 | 6.23827200  |
| H  | 7.85539600  | 3.26071800  | -2.10161600 | C | 3.49122000  | 0.36245900  | 4.81450200  |
| C  | 6.01579900  | 3.61601300  | -1.01544000 | H | 3.40611800  | 1.39227600  | 5.15980500  |
| C  | 5.94187700  | 2.32031700  | -0.40344000 | C | 4.37537600  | 0.05300500  | 3.78563200  |
| C  | 7.02408500  | 1.31941400  | -0.53908900 | H | 4.96889100  | 0.84371600  | 3.33258600  |
| C  | 8.37777100  | 1.59694800  | -0.15598700 | C | 6.77750800  | -0.87034100 | 2.20952600  |
| C  | 8.75653200  | 2.79874200  | 0.49303700  | H | 7.44013900  | -1.24880700 | 1.42367000  |
| H  | 7.99607000  | 3.54241800  | 0.71958300  | H | 6.63179100  | 0.20013400  | 2.04411600  |
| C  | 10.06388600 | 3.03135400  | 0.85236000  | H | 7.28736700  | -0.99254000 | 3.17171400  |
| H  | 10.32527400 | 3.95911900  | 1.35780800  | C | 1.45819500  | -0.69401500 | 0.93593500  |
| C  | 11.06542500 | 2.07745300  | 0.58148100  | H | 0.92663900  | 0.26575700  | 0.95102700  |
| H  | 12.09682800 | 2.27757600  | 0.86375400  | H | 2.14286900  | -0.81302800 | 1.78051800  |
| C  | 10.72984800 | 0.89063600  | -0.02334800 | C | 0.75727200  | -1.85311500 | 0.46634000  |
| H  | 11.48912600 | 0.13423900  | -0.21942700 | H | 1.13281400  | -2.81440000 | 0.82264900  |
| C  | 9.39153900  | 0.61119600  | -0.39076300 | C | -0.60214400 | -1.87683400 | -0.01033500 |
| C  | 9.03496300  | -0.63132900 | -0.96803500 | H | -1.00250800 | -0.92898200 | -0.37861700 |
| H  | 9.81551400  | -1.36701300 | -1.15755800 | C | 3.02460000  | -1.21657700 | -3.06041500 |

|   |             |             |             |   |            |             |             |
|---|-------------|-------------|-------------|---|------------|-------------|-------------|
| H | 3.94823600  | -1.79789700 | -3.04750100 | H | 6.15384500 | -5.36656700 | -0.58449700 |
| C | 1.81016000  | -1.96052000 | -2.96693900 | C | 5.14627300 | -2.27179000 | 0.31520400  |
| H | 1.90100500  | -3.04866600 | -2.91109200 | C | 5.90418700 | -3.46505000 | 0.57102000  |
| C | 0.49858700  | -1.47697700 | -3.53595600 | H | 6.56042400 | -3.61759800 | 1.42226900  |
| H | 0.49479400  | -1.59146800 | -4.63375200 | C | 2.95380900 | 0.30268400  | -2.74820200 |
| H | -0.29625900 | -2.13651800 | -3.16596000 | C | 2.40647700 | -0.93616200 | -3.45375700 |
| C | 0.16338900  | -0.03261200 | -3.14796500 | H | 2.54608900 | -0.94528900 | -4.53857000 |
| H | 0.47268200  | 0.67313900  | -3.93230500 | N | 3.53912600 | -0.26497800 | -1.52396900 |
| H | -0.92907100 | 0.07143400  | -3.07772400 | C | 3.72669600 | -1.52673000 | -1.75251500 |
| C | 0.77164500  | 0.39774600  | -1.82581200 | O | 3.20519300 | -2.01427500 | -2.90427200 |
| H | 0.06044000  | 0.60084700  | -1.02380200 | H | 1.35284000 | -1.14628100 | -3.21820600 |
| C | 2.00685100  | 1.05109400  | -1.71520300 | H | 2.15058300 | 0.99937500  | -2.46488700 |
| H | 2.13655800  | 1.70873400  | -0.85452000 | C | 4.00911600 | 1.04453400  | -3.59077800 |
| C | 2.93046600  | 1.32858100  | -2.87256100 | C | 4.90635800 | 1.95039600  | -2.75818300 |
| H | 3.90427300  | 1.63538700  | -2.46849800 | C | 3.33129300 | 1.80842200  | -4.72138100 |
| H | 2.55417400  | 2.19780100  | -3.44032200 | H | 4.64268000 | 0.26087300  | -4.04428200 |
| C | 3.12837500  | 0.11534500  | -3.79110000 | H | 5.45723700 | 1.38553500  | -1.99646700 |
| H | 2.40623400  | 0.13455200  | -4.61936100 | H | 5.63785000 | 2.45580100  | -3.40082400 |
| H | 4.11530100  | 0.18518800  | -4.26322500 | H | 4.33412400 | 2.72139400  | -2.22677300 |
| C | -1.16930100 | -3.05274000 | -0.65408300 | H | 2.68370900 | 1.16651700  | -5.33319800 |
| C | -2.24959500 | -2.90032300 | -1.55803900 | H | 2.70400600 | 2.62138500  | -4.32986400 |
| C | -0.75068600 | -4.36477800 | -0.38080300 | H | 4.07214700 | 2.25746100  | -5.39250600 |
| C | -2.90036100 | -4.04966600 | -2.08406600 | P | 4.93436800 | -0.82078400 | 1.38932400  |
| C | -2.90346800 | -1.76750000 | -2.11383700 | C | 4.30218700 | -1.49047600 | 2.97040500  |
| C | -1.39573200 | -5.47968600 | -0.92825600 | C | 3.91899600 | -0.53613100 | 3.92675000  |
| H | 0.09180900  | -4.52981100 | 0.29006000  | C | 4.15954700 | -2.84643300 | 3.27688100  |
| C | -2.49255400 | -5.34360200 | -1.77543000 | C | 3.42749300 | -0.92979900 | 5.16532800  |
| C | -3.90952800 | -2.24110700 | -2.91882200 | H | 4.00794900 | 0.52628400  | 3.68860600  |
| H | -2.68323100 | -0.72496500 | -1.91838300 | C | 3.66732500 | -3.23905000 | 4.52076700  |
| H | -1.03557600 | -6.47537200 | -0.67868600 | H | 4.41741900 | -3.60589700 | 2.54073700  |
| H | -2.99756500 | -6.21655300 | -2.18579600 | C | 3.30336100 | -2.28612900 | 5.46695600  |
| H | -4.64672800 | -1.70153700 | -3.50471200 | H | 3.14042700 | -0.17673000 | 5.89789700  |
| N | -3.92078000 | -3.61497300 | -2.90400800 | H | 3.56425000 | -4.29974100 | 4.74513900  |
| C | -4.86875400 | -4.46559700 | -3.58038100 | H | 2.92170800 | -2.59771000 | 6.43762500  |
| H | -5.41776000 | -5.08454700 | -2.85936100 | C | 6.62614300 | -0.29716700 | 1.85213300  |
| H | -5.58932500 | -3.84037700 | -4.11329600 | C | 7.10208300 | 0.92928200  | 1.37387900  |
| H | -4.36779600 | -5.12096800 | -4.30276700 | C | 7.44663200 | -1.07268700 | 2.68071800  |

TS2'

| Atomic Type | Coordinates (Angstroms) |             |             |
|-------------|-------------------------|-------------|-------------|
|             | X                       | Y           | Z           |
| C           | 4.46132000              | -2.48646400 | -0.95194300 |
| C           | 4.80163100              | -3.79948000 | -1.42577000 |
| H           | 4.47522300              | -4.22428800 | -2.36833600 |
| C           | 5.68374200              | -4.39422800 | -0.48560600 |

|   |            |             |            |
|---|------------|-------------|------------|
| C | 8.38939400 | 1.35668000  | 1.69059300 |
| H | 6.45169100 | 1.54818400  | 0.75061600 |
| C | 8.73152000 | -0.64433500 | 2.99728300 |
| H | 7.06690400 | -2.00445000 | 3.10178700 |
| C | 9.20626400 | 0.56793900  | 2.49725900 |
| H | 8.75230000 | 2.31120300  | 1.31414800 |
| H | 9.36162800 | -1.25184600 | 3.64416400 |

|    |             |             |             |   |              |             |             |
|----|-------------|-------------|-------------|---|--------------|-------------|-------------|
| H  | 10.20994700 | 0.90420800  | 2.75004300  | C | -3.58772500  | -2.41781900 | -0.14678600 |
| Cu | 3.58279800  | 0.57007600  | 0.36363100  | C | -2.28379100  | -2.94080300 | -0.05724100 |
| O  | 3.63226800  | 2.67992700  | 0.29721600  | H | -1.56896700  | -2.44820500 | 0.60352800  |
| C  | 2.78132000  | 3.17587800  | 1.05765800  | C | -1.95727800  | -4.05415500 | -0.78867900 |
| O  | 2.80928800  | 4.47088500  | 1.38979600  | H | -0.95947400  | -4.48740500 | -0.72003900 |
| C  | 1.65545100  | 2.43945300  | 1.62422200  | C | -2.90396800  | -4.64784200 | -1.65857100 |
| N  | 1.81569500  | 1.06363100  | 1.45495800  | C | -2.55548100  | -5.75360200 | -2.47027900 |
| C  | 1.16523400  | 0.21753500  | 2.20300800  | H | -1.54515600  | -6.15475400 | -2.39046600 |
| H  | 0.59408800  | 0.55003600  | 3.07985400  | C | -3.46170400  | -6.30405000 | -3.34438700 |
| C  | 1.13765400  | -1.20338800 | 1.91007000  | H | -3.18042700  | -7.15218600 | -3.96508500 |
| C  | 0.83050000  | -2.13498900 | 2.91143100  | C | -4.75705800  | -5.75745300 | -3.44500800 |
| C  | 1.38159800  | -1.68156200 | 0.61029800  | H | -5.46575600  | -6.17678100 | -4.15624000 |
| C  | 0.82672300  | -3.49779800 | 2.64668100  | C | -5.13493700  | -4.69596300 | -2.65507400 |
| H  | 0.63125600  | -1.78387800 | 3.92266300  | H | -6.13647900  | -4.28309400 | -2.75005700 |
| C  | 1.38796300  | -3.03986700 | 0.32907300  | C | -4.23489300  | -4.11802800 | -1.72585300 |
| H  | 1.54175600  | -0.95976000 | -0.18921900 | C | -4.59787800  | -3.01067500 | -0.88780000 |
| C  | 1.12597600  | -3.94230400 | 1.36026000  | C | -5.98448800  | -2.49624400 | -0.79510400 |
| H  | 0.61876800  | -4.21774600 | 3.43452500  | C | -7.09200900  | -3.34912500 | -0.46165400 |
| H  | 1.58152700  | -3.40209800 | -0.67967900 | C | -6.93007700  | -4.70726100 | -0.08832300 |
| C  | 3.82851000  | 5.25405700  | 0.75964400  | H | -5.92930000  | -5.12925100 | -0.03862000 |
| H  | 4.81301400  | 4.97969000  | 1.15198500  | C | -8.01401300  | -5.49414600 | 0.22715000  |
| H  | 3.81331800  | 5.10030300  | -0.32421500 | H | -7.85675700  | -6.53124900 | 0.51733300  |
| H  | 3.58984000  | 6.28866000  | 1.00941500  | C | -9.32161800  | -4.97079600 | 0.18553400  |
| C  | 7.57461500  | -0.96882400 | -1.48726900 | H | -10.17032100 | -5.60602100 | 0.42964700  |
| C  | 6.99392700  | -1.40563800 | -2.71222200 | C | -9.51430100  | -3.65153000 | -0.14392800 |
| H  | 6.29649300  | -0.83763600 | -3.32118100 | H | -10.51634900 | -3.22365300 | -0.15879400 |
| C  | 7.43032600  | -2.73982200 | -2.96018400 | C | -8.42094000  | -2.80914900 | -0.45653800 |
| H  | 7.13231400  | -3.36397900 | -3.79560200 | C | -8.61939500  | -1.43753400 | -0.74200500 |
| C  | 8.37248100  | -2.03464100 | -0.97097100 | H | -9.63463400  | -1.04280000 | -0.75057100 |
| H  | 8.91312400  | -2.02475700 | -0.03013000 | C | -7.55065100  | -0.61218800 | -0.97397800 |
| C  | 8.28646800  | -3.12738900 | -1.88548600 | H | -7.67322500  | 0.45044400  | -1.17153400 |
| H  | 8.75075700  | -4.09988300 | -1.76194700 | C | -6.24976000  | -1.14766300 | -0.97653400 |
| H  | 7.41090200  | -0.00997000 | -1.00822400 | C | -4.26784200  | 2.34961100  | 1.31054200  |
| C  | 0.97088800  | 2.98442100  | 2.83984800  | H | -3.39574200  | 2.34408000  | 1.98996500  |
| H  | 0.90916200  | 4.07443900  | 2.79178400  | C | -5.29249300  | 3.29198800  | 1.89331200  |
| H  | -0.04762100 | 2.58472800  | 2.93944900  | C | -6.63945500  | 3.23506500  | 1.52333600  |
| H  | 1.51338800  | 2.71820000  | 3.76050200  | H | -6.96736000  | 2.44856100  | 0.84181700  |
| Fe | 6.44762800  | -2.63981500 | -1.18552600 | C | -7.54939200  | 4.15598300  | 2.03253700  |
| Cl | 1.16914700  | -5.65085800 | 1.02968100  | H | -8.59688700  | 4.09920100  | 1.74181700  |
| Ir | -2.46351000 | 1.47273000  | -1.04114400 | C | -7.12495500  | 5.14863000  | 2.91447700  |
| P  | -4.09547700 | 0.15893100  | -0.10262700 | H | -7.83915500  | 5.86570200  | 3.31387500  |
| O  | -3.86145500 | -1.30118100 | 0.62645900  | C | -5.78535600  | 5.21383500  | 3.28751700  |
| O  | -5.21943300 | -0.25856300 | -1.24584400 | H | -5.44719100  | 5.98188300  | 3.98078400  |
| N  | -4.77189100 | 0.96185600  | 1.20738200  | C | -4.87813600  | 4.28707700  | 2.78072600  |

|   |             |             |             |               |                                |             |             |
|---|-------------|-------------|-------------|---------------|--------------------------------|-------------|-------------|
| H | -3.82673500 | 4.33077200  | 3.07527900  | H             | -2.23847800                    | -1.03337400 | -4.24478600 |
| C | -3.79921200 | 2.82785900  | -0.05265200 | C             | -3.37566800                    | 0.80674600  | -3.94309300 |
| H | -4.67452400 | 3.02424900  | -0.69240500 | H             | -2.81673400                    | 1.20528300  | -4.80111700 |
| H | -3.27057800 | 3.78281200  | 0.06506600  | H             | -4.37154300                    | 0.56429500  | -4.33259400 |
| C | -5.19512600 | 0.36207600  | 2.51910300  | C             | 0.23264100                     | 4.24159500  | -0.17438100 |
| H | -5.70793300 | 1.20392200  | 3.00628600  | C             | 1.09206000                     | 4.76542900  | -1.16796400 |
| C | -3.99767500 | 0.02605400  | 3.39198800  | C             | -0.51236600                    | 5.16332900  | 0.57007900  |
| C | -3.39506500 | 1.05068300  | 4.13451200  | C             | 1.16388200                     | 6.16731100  | -1.37402100 |
| H | -3.85000700 | 2.04292500  | 4.13300100  | C             | 1.97960100                     | 4.16696500  | -2.10688500 |
| C | -2.25140800 | 0.81706200  | 4.89453700  | C             | -0.41737200                    | 6.54444000  | 0.35494200  |
| H | -1.80274200 | 1.63002400  | 5.46385100  | H             | -1.17745600                    | 4.80698200  | 1.35566900  |
| C | -1.70316400 | -0.46147800 | 4.94526500  | C             | 0.42137500                     | 7.07331300  | -0.61883900 |
| H | -0.81756400 | -0.65364500 | 5.55161800  | C             | 2.54757900                     | 5.18585300  | -2.83028500 |
| C | -2.31879300 | -1.50133200 | 4.24988000  | H             | 2.19633700                     | 3.11168200  | -2.21631200 |
| H | -1.91582600 | -2.51184200 | 4.30810700  | H             | -1.01603100                    | 7.21654800  | 0.96559600  |
| C | -3.45480200 | -1.26044000 | 3.48361100  | H             | 0.48768300                     | 8.14741300  | -0.78272800 |
| H | -3.92287800 | -2.08371800 | 2.94921500  | H             | 3.27435000                     | 5.15470000  | -3.63502300 |
| C | -6.22632000 | -0.74038100 | 2.37898900  | N             | 2.06454200                     | 6.39822300  | -2.39158800 |
| H | -7.06509700 | -0.40046200 | 1.76170700  | C             | 2.40027100                     | 7.69588800  | -2.92370000 |
| H | -5.83127700 | -1.65628600 | 1.93157700  | H             | 2.79898700                     | 8.34807600  | -2.13736500 |
| H | -6.61536600 | -0.99400500 | 3.37150600  | H             | 3.16194600                     | 7.58026200  | -3.69778000 |
| C | -1.31692900 | 0.79900600  | 0.67389700  | H             | 1.52184900                     | 8.17972300  | -3.36758000 |
| H | -0.60038500 | 0.05166100  | 0.33120300  |               |                                |             |             |
| H | -1.89703900 | 0.46635500  | 1.54076500  | <b>TS3</b>    |                                |             |             |
| C | -1.00609500 | 2.19315100  | 0.57002100  | <b>Atomic</b> | <b>Coordinates (Angstroms)</b> |             |             |
| H | -1.59556200 | 2.84655400  | 1.21377800  | <b>Type</b>   | <b>X</b>                       | <b>Y</b>    | <b>Z</b>    |
| C | 0.18767800  | 2.79765000  | 0.05371800  | Ir            | 2.37725300                     | 1.56802300  | -0.99647400 |
| H | 0.77710600  | 2.20442400  | -0.64780200 | P             | 4.09021800                     | 0.33659200  | -0.09785700 |
| C | -3.51368500 | 1.88770400  | -2.88118100 | O             | 3.90920200                     | -1.12258300 | 0.66758300  |
| H | -4.54545500 | 2.15347400  | -2.64165300 | O             | 5.19694400                     | -0.06703500 | -1.26371800 |
| C | -2.53792900 | 2.91261700  | -2.66876700 | C             | 3.48955600                     | -2.20143600 | -0.09451300 |
| H | -2.91058900 | 3.87516000  | -2.30700700 | C             | 2.19051600                     | -2.69328300 | 0.14178200  |
| C | -1.24781100 | 3.00375800  | -3.44391100 | H             | 1.59484300                     | -2.23641500 | 0.93221000  |
| H | -1.43254900 | 3.39871200  | -4.45793900 | C             | 1.71831800                     | -3.73184900 | -0.61999700 |
| H | -0.60582400 | 3.74274400  | -2.94750800 | H             | 0.72138200                     | -4.13596900 | -0.44198400 |
| C | -0.49923800 | 1.67068400  | -3.51878600 | C             | 2.50074900                     | -4.26922500 | -1.67231400 |
| H | -0.74778100 | 1.12669800  | -4.44147100 | C             | 1.99162900                     | -5.26480400 | -2.54162500 |
| H | 0.57920900  | 1.87603000  | -3.58768900 | H             | 0.98596800                     | -5.64663200 | -2.36134400 |
| C | -0.75423200 | 0.76331900  | -2.32479800 | C             | 2.74170100                     | -5.74471300 | -3.58847500 |
| H | 0.10186900  | 0.59882800  | -1.66130600 | H             | 2.33378100                     | -6.50397400 | -4.25256600 |
| C | -1.73064800 | -0.24654600 | -2.31167400 | C             | 4.04311600                     | -5.24771400 | -3.80410600 |
| H | -1.54183600 | -1.10589600 | -1.66389600 | H             | 4.62824200                     | -5.61398300 | -4.64525300 |
| C | -2.72462600 | -0.48214000 | -3.42170900 | C             | 4.58115100                     | -4.30459000 | -2.95952000 |
| H | -3.50554300 | -1.14976300 | -3.03544000 | H             | 5.58675200                     | -3.92804800 | -3.13464800 |
|   |             |             |             | C             | 3.83842700                     | -3.79246600 | -1.86747600 |



|   |             |             |             |   |             |             |             |
|---|-------------|-------------|-------------|---|-------------|-------------|-------------|
| C | 4.36582700  | -2.78564600 | -0.99321800 | C | -4.90113100 | -2.75049500 | 0.67125100  |
| C | 5.79083000  | -2.38441600 | -1.00642000 | C | -5.55146600 | -4.02581700 | 0.54377800  |
| C | 6.83806300  | -3.35254100 | -0.82831000 | H | -5.82274300 | -4.66870300 | 1.37330500  |
| C | 6.58245500  | -4.71986600 | -0.55365900 | C | -5.83493200 | -4.24342800 | -0.83053300 |
| H | 5.55533700  | -5.06273800 | -0.46011600 | H | -6.36518900 | -5.09618400 | -1.24086400 |
| C | 7.61082600  | -5.61843600 | -0.38650900 | C | -4.78363100 | -2.17437600 | -0.65884900 |
| H | 7.38232400  | -6.65985700 | -0.16862300 | C | -5.36749400 | -3.11987600 | -1.56667600 |
| C | 8.95369300  | -5.20385200 | -0.48392100 | H | -5.45063500 | -2.98332300 | -2.64024200 |
| H | 9.75679200  | -5.92639500 | -0.35575900 | C | -4.19665700 | -0.76805800 | 3.66460800  |
| C | 9.23973000  | -3.88163300 | -0.72168600 | C | -4.32832500 | -2.21145200 | 4.16922400  |
| H | 10.27245600 | -3.53878000 | -0.77802300 | H | -5.10085900 | -2.34553500 | 4.93357300  |
| C | 8.20636600  | -2.92798600 | -0.88402300 | N | -4.27532300 | -0.91122400 | 2.19996900  |
| C | 8.50419500  | -1.55829900 | -1.07867800 | C | -4.60980700 | -2.13720000 | 1.95279400  |
| H | 9.54716800  | -1.24871000 | -1.12999100 | O | -4.73962600 | -2.96571800 | 3.00832400  |
| C | 7.49959100  | -0.63116100 | -1.17459300 | H | -3.38787300 | -2.64583600 | 4.52919400  |
| H | 7.70237500  | 0.43001800  | -1.30261600 | H | -3.21202000 | -0.34602700 | 3.92000800  |
| C | 6.15841200  | -1.05265200 | -1.11758900 | C | -5.27695400 | 0.17196400  | 4.21882000  |
| C | 1.32347900  | 0.88022100  | 0.77300500  | C | -5.25242500 | 1.52567200  | 3.52973500  |
| H | 0.63435600  | 0.07201200  | 0.50684500  | C | -5.10200200 | 0.33339800  | 5.72399900  |
| H | 1.94520500  | 0.63907200  | 1.64178300  | H | -6.25370500 | -0.30540600 | 4.02247700  |
| C | 0.88379500  | 2.23397800  | 0.58559200  | H | -5.41470200 | 1.44274100  | 2.45019700  |
| H | 1.41804900  | 3.01075300  | 1.13473100  | H | -6.01948100 | 2.19019700  | 3.94511800  |
| C | -0.41336900 | 2.59191700  | 0.10032500  | H | -4.27832100 | 2.01748700  | 3.67720200  |
| H | -0.98329400 | 1.78242100  | -0.36044400 | H | -5.13178400 | -0.62164900 | 6.26303400  |
| C | 3.39582200  | 2.05736900  | -2.84848900 | H | -4.13816500 | 0.81051100  | 5.95096400  |
| H | 4.41776800  | 2.35460200  | -2.60472500 | H | -5.88840800 | 0.96893400  | 6.14539500  |
| C | 2.37996100  | 3.03237000  | -2.61122600 | P | -3.92474500 | -0.63654200 | -1.11335500 |
| H | 2.70978800  | 4.00337400  | -2.23123100 | C | -2.69457300 | -1.27045300 | -2.31287600 |
| C | 1.08544300  | 3.07427100  | -3.38184800 | C | -2.30686400 | -0.53156100 | -3.43750700 |
| H | 1.26192800  | 3.46228200  | -4.40014700 | C | -2.05464900 | -2.49176700 | -2.05781100 |
| H | 0.42292900  | 3.80284000  | -2.89788800 | C | -1.31931100 | -1.01482200 | -4.29324600 |
| C | 0.37760700  | 1.71694500  | -3.44706900 | H | -2.78759700 | 0.42351400  | -3.65546300 |
| H | 0.61192800  | 1.20138300  | -4.38969900 | C | -1.05567400 | -2.96120400 | -2.90282800 |
| H | -0.70859300 | 1.88193600  | -3.46427900 | H | -2.36884500 | -3.09265000 | -1.20364600 |
| C | 0.69961700  | 0.78303400  | -2.28959400 | C | -0.68488400 | -2.22493300 | -4.02575400 |
| H | -0.14293900 | 0.52958400  | -1.64133800 | H | -1.04202900 | -0.43483400 | -5.17187000 |
| C | 1.72793400  | -0.16921500 | -2.31304500 | H | -0.57259400 | -3.91424200 | -2.69386800 |
| H | 1.58341100  | -1.05267000 | -1.68937500 | H | 0.09386800  | -2.60009900 | -4.68815200 |
| C | 2.72043900  | -0.32808100 | -3.43505700 | C | -5.12941900 | 0.27990300  | -2.13996600 |
| H | 3.54586500  | -0.95625700 | -3.07795500 | C | -5.72583000 | 1.41800400  | -1.58378700 |
| H | 2.24936000  | -0.89302400 | -4.25895600 | C | -5.52636700 | -0.14425100 | -3.41578000 |
| C | 3.28604500  | 1.00380700  | -3.93919800 | C | -6.72643400 | 2.09839600  | -2.27472400 |
| H | 2.67590800  | 1.39795200  | -4.76389000 | H | -5.39349400 | 1.77471500  | -0.60840400 |
| H | 4.28016900  | 0.82932100  | -4.36796100 | C | -6.51872900 | 0.54316100  | -4.10828900 |

|    |             |             |             |    |             |             |             |
|----|-------------|-------------|-------------|----|-------------|-------------|-------------|
| H  | -5.04931400 | -1.00991800 | -3.87565100 | C  | 3.63628400  | 3.00023000  | -0.02888000 |
| C  | -7.12749400 | 1.65991900  | -3.53422800 | N  | 4.78767500  | 1.19518300  | 1.16374700  |
| H  | -7.18736600 | 2.97828000  | -1.82851400 | Cl | -0.84515900 | -5.70618000 | 2.70539500  |
| H  | -6.82159600 | 0.20446200  | -5.09744100 | C  | -0.71974400 | 3.91383500  | -0.42504300 |
| H  | -7.91043100 | 2.18940900  | -4.07394100 | C  | -1.75721100 | 4.05146600  | -1.37843600 |
| Cu | -3.34569800 | 0.31481000  | 0.77671800  | C  | -0.01833800 | 5.06812600  | -0.06034000 |
| O  | -3.75034200 | 2.41679900  | 0.84458500  | C  | -2.02225500 | 5.32766100  | -1.94234800 |
| C  | -2.84250300 | 3.02253900  | 1.43470300  | C  | -2.65532000 | 3.13296000  | -1.99813100 |
| O  | -2.89792700 | 4.34542400  | 1.63171700  | C  | -0.31081400 | 6.31750500  | -0.61989100 |
| C  | -1.62571900 | 2.39406600  | 1.92880900  | H  | 0.78616900  | 4.99564300  | 0.67156300  |
| N  | -1.72826900 | 1.00426000  | 1.93241600  | C  | -1.31283400 | 6.46969100  | -1.57326500 |
| C  | -0.96217400 | 0.28019200  | 2.69914700  | C  | -3.41415300 | 3.85280100  | -2.88492500 |
| H  | -0.31156400 | 0.75194800  | 3.44612400  | H  | -2.76412300 | 2.07399100  | -1.78291700 |
| C  | -0.92417400 | -1.17053100 | 2.65417700  | H  | 0.26519100  | 7.18646600  | -0.30987300 |
| C  | -0.48060200 | -1.87425600 | 3.78651300  | H  | -1.52423900 | 7.44203100  | -2.01499100 |
| C  | -1.30734800 | -1.91507600 | 1.52364900  | H  | -4.21430200 | 3.52776200  | -3.54180200 |
| C  | -0.45414600 | -3.26189700 | 3.81690500  | N  | -3.04179400 | 5.17982700  | -2.85790700 |
| H  | -0.15621200 | -1.31323700 | 4.66205500  | C  | -3.58729500 | 6.23852600  | -3.67013200 |
| C  | -1.29505200 | -3.30157400 | 1.54294100  | H  | -4.38926100 | 5.83568100  | -4.29276300 |
| H  | -1.60196400 | -1.39148100 | 0.61115400  | H  | -4.00055300 | 7.03876900  | -3.04421100 |
| C  | -0.87215100 | -3.97093700 | 2.69199300  | H  | -2.82013600 | 6.66873900  | -4.32530100 |
| H  | -0.11442000 | -3.79608900 | 4.70088900  | H  | 5.91667900  | 1.50029300  | 2.83975500  |
| H  | -1.59970600 | -3.87642400 | 0.67055900  | H  | 3.36578800  | 2.48389100  | 2.03380800  |
| C  | -4.04046200 | 4.99794100  | 1.06863400  | H  | 4.47082000  | 3.26541500  | -0.69741800 |
| H  | -4.14575900 | 4.73728000  | 0.01009100  | H  | 3.05505800  | 3.91905800  | 0.12399600  |
| H  | -4.94776700 | 4.70225000  | 1.60656000  | C  | 4.30928900  | 0.27357000  | 3.43559300  |
| H  | -3.85391500 | 6.06530900  | 1.19132400  | C  | 3.79231800  | 1.28338400  | 4.25719500  |
| C  | -7.58645400 | -0.75763900 | 0.32827900  | C  | 3.81888300  | -1.02667900 | 3.59650500  |
| C  | -7.93533700 | -1.77383800 | 1.26840300  | C  | 2.79241500  | 1.01643900  | 5.18860300  |
| H  | -7.69372800 | -1.77480800 | 2.32711700  | H  | 4.20534200  | 2.29085200  | 4.17883600  |
| C  | -8.57981500 | -2.82854300 | 0.55971300  | C  | 2.82780600  | -1.30048300 | 4.53353500  |
| H  | -8.92223600 | -3.76572400 | 0.98508100  | H  | 4.21918300  | -1.83479300 | 2.98887900  |
| C  | -8.01827600 | -1.18681600 | -0.96427600 | C  | 2.30696800  | -0.28038600 | 5.32834600  |
| H  | -7.86465100 | -0.65313300 | -1.89739400 | H  | 2.41407700  | 1.81655000  | 5.82323500  |
| C  | -8.63035100 | -2.46640300 | -0.81896600 | H  | 2.46871800  | -2.32228100 | 4.65066800  |
| H  | -9.02393200 | -3.08001800 | -1.62229400 | H  | 1.54727200  | -0.50073100 | 6.07814000  |
| H  | -7.04060000 | 0.15485200  | 0.55041400  | C  | 5.18863500  | 3.55978400  | 1.82583200  |
| C  | -0.81305800 | 3.11047600  | 2.96081500  | C  | 4.75572700  | 4.54119800  | 2.71945500  |
| H  | 0.21100700  | 2.71853000  | 3.01180300  | C  | 6.51149100  | 3.59186300  | 1.37504700  |
| H  | -0.75811200 | 4.17797100  | 2.72991500  | C  | 5.62191500  | 5.54066200  | 3.15478300  |
| H  | -1.25094800 | 3.00916100  | 3.96602900  | H  | 3.72188200  | 4.51671300  | 3.07327500  |
| Fe | -6.70193100 | -2.51445100 | -0.16379800 | C  | 7.38122400  | 4.58494500  | 1.81392300  |
| C  | 4.19801600  | 2.54621500  | 1.30675000  | H  | 6.85255400  | 2.81923600  | 0.68355500  |
| C  | 5.38030300  | 0.63664400  | 2.42192400  | C  | 6.93860500  | 5.56263300  | 2.70356900  |

|               |                                |             |             |   |             |             |             |
|---------------|--------------------------------|-------------|-------------|---|-------------|-------------|-------------|
| H             | 5.27002100                     | 6.29816200  | 3.85273900  | H | -8.31905000 | -0.55988900 | -1.51541800 |
| H             | 8.41117300                     | 4.59668300  | 1.46164400  | C | -6.92443800 | 0.94814800  | -0.89163700 |
| H             | 7.62141900                     | 6.33698300  | 3.04746800  | C | -3.72571800 | -1.39210500 | -3.06371900 |
| C             | 6.42709100                     | -0.43267500 | 2.17707000  | H | -4.66748900 | -1.93615300 | -2.96151500 |
| H             | 6.02363900                     | -1.35346300 | 1.74624600  | C | -2.53377500 | -2.17466800 | -2.98846000 |
| H             | 7.20377600                     | -0.05688900 | 1.50224200  | H | -2.65541500 | -3.25217700 | -2.84816900 |
| H             | 6.90343600                     | -0.69008000 | 3.12956700  | C | -1.24547700 | -1.77577100 | -3.66938900 |
| <b>TS3'</b>   |                                |             |             | H | -1.32015000 | -1.94945000 | -4.75673100 |
| <b>Atomic</b> | <b>Coordinates (Angstroms)</b> |             |             | H | -0.45236600 | -2.44621100 | -3.31550100 |
| <b>Type</b>   | <b>X</b>                       | <b>Y</b>    | <b>Z</b>    | C | -0.83604500 | -0.32602700 | -3.38736400 |
| Ir            | -2.84648800                    | -1.15074800 | -1.08645600 | H | -1.16945400 | 0.34372000  | -4.19361600 |
| P             | -4.77073800                    | -0.46350400 | -0.03615600 | H | 0.26184700  | -0.26417800 | -3.39333400 |
| O             | -4.85527500                    | 0.77325800  | 1.06567700  | C | -1.35666000 | 0.20478300  | -2.06291600 |
| O             | -5.89507500                    | 0.05615700  | -1.13535300 | H | -0.60049900 | 0.44635000  | -1.30990600 |
| C             | -4.47397400                    | 2.02649800  | 0.62488400  | C | -2.55763800 | 0.92329300  | -1.94639000 |
| C             | -3.25609200                    | 2.52932500  | 1.11903900  | H | -2.61345600 | 1.65374900  | -1.13960000 |
| H             | -2.72052900                    | 1.93434700  | 1.85699500  | C | -3.51986000 | 1.15049800  | -3.08331000 |
| C             | -2.79100000                    | 3.73483200  | 0.65985900  | H | -4.45494900 | 1.54266500  | -2.66549500 |
| H             | -1.85516100                    | 4.14761300  | 1.03539100  | H | -3.12831700 | 1.95195600  | -3.73502500 |
| C             | -3.50152400                    | 4.44046700  | -0.34238700 | C | -3.81877700 | -0.11804700 | -3.89032100 |
| C             | -2.98228900                    | 5.62920500  | -0.90862600 | H | -3.14502400 | -0.19786400 | -4.75499600 |
| H             | -2.02861800                    | 6.00528600  | -0.53675300 | H | -4.82744000 | -0.04106900 | -4.31339700 |
| C             | -3.65370800                    | 6.28993100  | -1.90934000 | C | 5.69810900  | 1.61146100  | -1.22124200 |
| H             | -3.24021900                    | 7.19964000  | -2.34001500 | C | 6.83056600  | 2.03884400  | -2.00000200 |
| C             | -4.88040800                    | 5.78193200  | -2.38380200 | H | 6.79387000  | 2.32710600  | -3.04444400 |
| H             | -5.40039600                    | 6.29459500  | -3.19040800 | C | 7.96528200  | 2.07965500  | -1.14749000 |
| C             | -5.42655300                    | 4.64373600  | -1.83658400 | H | 8.95951800  | 2.40663600  | -1.43251100 |
| H             | -6.37424800                    | 4.26014700  | -2.20946700 | C | 6.15582500  | 1.38608200  | 0.14542100  |
| C             | -4.76700300                    | 3.94329800  | -0.79691100 | C | 7.55644900  | 1.69491800  | 0.16038100  |
| C             | -5.29963300                    | 2.73718900  | -0.22993100 | H | 8.18970400  | 1.66257200  | 1.04161000  |
| C             | -6.67592800                    | 2.25417300  | -0.49087100 | C | 2.13129000  | 1.83813400  | -1.99194600 |
| C             | -7.81495200                    | 3.09976400  | -0.24654600 | C | 2.82746500  | 1.97430400  | -3.34517400 |
| C             | -7.70409600                    | 4.39601900  | 0.31803600  | H | 2.54676900  | 2.86191500  | -3.91847200 |
| H             | -6.72441400                    | 4.77493500  | 0.59665700  | N | 3.23021000  | 1.37123800  | -1.12049700 |
| C             | -8.81500700                    | 5.17709700  | 0.53928100  | C | 4.33918700  | 1.65875900  | -1.73072300 |
| H             | -8.69543600                    | 6.16438900  | 0.98118500  | O | 4.22637500  | 2.11279600  | -3.00063500 |
| C             | -10.10264600                   | 4.71055100  | 0.21028600  | H | 2.72577900  | 1.08480200  | -3.98133700 |
| H             | -10.97193600                   | 5.34097400  | 0.38462100  | H | 1.33998400  | 1.07497300  | -2.01384200 |
| C             | -10.25243700                   | 3.44773300  | -0.30912200 | C | 1.51165200  | 3.15582700  | -1.49517400 |
| H             | -11.24210100                   | 3.05821800  | -0.54619300 | C | 1.07357800  | 3.06973900  | -0.04237000 |
| C             | -9.13242700                    | 2.61261200  | -0.53446500 | C | 0.33328000  | 3.55100700  | -2.37976900 |
| C             | -9.29844900                    | 1.29195100  | -1.01436000 | H | 2.29789400  | 3.92744400  | -1.58130500 |
| H             | -10.30293600                   | 0.93435700  | -1.23701600 | H | 1.89111500  | 2.76397000  | 0.62142400  |
| C             | -8.21757100                    | 0.46711400  | -1.17128700 | H | 0.69030300  | 4.03900600  | 0.30099100  |

|    |             |             |             |    |             |             |             |
|----|-------------|-------------|-------------|----|-------------|-------------|-------------|
| H  | 0.26893100  | 2.32955300  | 0.08331800  | H  | 6.68714500  | -1.12060900 | -2.16790100 |
| H  | 0.59473200  | 3.61422900  | -3.44356100 | C  | -0.47804800 | 0.50559400  | 3.54652800  |
| H  | -0.48666900 | 2.82524700  | -2.28174800 | H  | 0.27734400  | 1.01023300  | 4.15761900  |
| H  | -0.06258700 | 4.52982300  | -2.08596900 | H  | -0.76156400 | 1.16545200  | 2.71956300  |
| P  | 5.13565200  | 0.74643800  | 1.50793500  | H  | -1.35010100 | 0.23841600  | 4.14587400  |
| C  | 6.00884600  | -0.72800200 | 2.14552500  | C  | 5.06292500  | 4.55082500  | 0.28161500  |
| C  | 5.34370000  | -1.43457400 | 3.15903700  | C  | 5.37786000  | 4.88712000  | -1.07081600 |
| C  | 7.21414500  | -1.23375100 | 1.64809800  | H  | 4.69871100  | 4.85332700  | -1.91737400 |
| C  | 5.88138100  | -2.60727600 | 3.67596700  | C  | 6.76782700  | 5.19359500  | -1.13536800 |
| H  | 4.38862200  | -1.06232000 | 3.53689500  | H  | 7.32469500  | 5.43822800  | -2.03348600 |
| C  | 7.74583200  | -2.41529600 | 2.15996400  | C  | 6.26137200  | 4.65557800  | 1.05106100  |
| H  | 7.72831200  | -0.72283700 | 0.83587600  | H  | 6.36333900  | 4.42622100  | 2.10760600  |
| C  | 7.08480500  | -3.10188300 | 3.17473400  | C  | 7.31194000  | 5.04963300  | 0.17447300  |
| H  | 5.35648600  | -3.14076000 | 4.46665000  | H  | 8.35537400  | 5.17034400  | 0.44545800  |
| H  | 8.68012100  | -2.80199100 | 1.75562500  | H  | 4.09385100  | 4.22751500  | 0.65133700  |
| H  | 7.50280600  | -4.02519400 | 3.57129400  | C  | 1.13125300  | -3.13614400 | 2.33134300  |
| C  | 5.34212600  | 1.95512400  | 2.86141500  | H  | 0.15803200  | -3.04911800 | 2.81974600  |
| C  | 4.28123000  | 2.82219100  | 3.14595500  | H  | 1.10881500  | -4.02262400 | 1.68666800  |
| C  | 6.52748700  | 2.05589800  | 3.59984000  | H  | 1.88577700  | -3.32062200 | 3.11184300  |
| C  | 4.41688300  | 3.80204900  | 4.12680200  | Fe | 6.47698900  | 3.29487900  | -0.45400800 |
| H  | 3.34639500  | 2.71982800  | 2.58954300  | C  | -4.49660800 | -2.91365900 | 0.84941200  |
| C  | 6.66044100  | 3.03190600  | 4.58248300  | C  | -6.10849400 | -1.53105600 | 2.21548400  |
| H  | 7.34425200  | 1.35799200  | 3.41158300  | C  | -3.83951400 | -2.96322300 | -0.51950800 |
| C  | 5.60813400  | 3.91082200  | 4.84091800  | N  | -5.34088400 | -1.69801300 | 0.94035500  |
| H  | 3.58978500  | 4.47701300  | 4.33929100  | C  | 0.07677000  | -1.96132400 | -0.16867300 |
| H  | 7.58454500  | 3.10494600  | 5.15293100  | C  | -1.26137000 | -1.92259000 | 0.35934200  |
| H  | 5.71437400  | 4.67333700  | 5.60991500  | H  | 0.47431000  | -1.00711500 | -0.52236800 |
| Cu | 3.16931000  | 0.28988500  | 0.63064800  | H  | -1.64182700 | -2.86911900 | 0.74796600  |
| O  | 1.35266600  | 0.49173800  | 1.69105400  | C  | -1.91207600 | -0.73420300 | 0.82190400  |
| C  | 0.97350100  | -0.62083400 | 2.09316400  | H  | -1.34881100 | 0.20586900  | 0.77906500  |
| O  | 0.04165100  | -0.73098800 | 3.04865000  | H  | -2.55894800 | -0.80501500 | 1.70216100  |
| C  | 1.44628500  | -1.89198600 | 1.55939400  | Cl | 8.48790100  | -3.32350400 | -2.40801800 |
| N  | 2.66291700  | -1.75466700 | 0.88474800  | H  | -3.70359700 | -2.84407800 | 1.61839300  |
| C  | 3.37982700  | -2.82330900 | 0.66246000  | H  | -4.60625200 | -3.20591700 | -1.27227500 |
| H  | 3.06107300  | -3.78646200 | 1.07853800  | H  | -3.11107900 | -3.78430300 | -0.53951500 |
| C  | 4.59817100  | -2.88838800 | -0.11033400 | H  | -6.45923100 | -2.55148300 | 2.42533100  |
| C  | 5.31477000  | -4.09978000 | -0.10663100 | C  | -5.28085600 | -4.17828400 | 1.09892200  |
| C  | 5.10730300  | -1.82820800 | -0.88087000 | C  | -4.69571200 | -5.21786400 | 1.82436200  |
| C  | 6.50182700  | -4.24349000 | -0.80751100 | C  | -6.55286600 | -4.36857400 | 0.54965100  |
| H  | 4.93157100  | -4.93919500 | 0.47459400  | C  | -5.36134600 | -6.42864100 | 1.99629600  |
| C  | 6.29544900  | -1.95312700 | -1.58547600 | H  | -3.70225300 | -5.07105200 | 2.25507200  |
| H  | 4.55309200  | -0.89286400 | -0.92827100 | C  | -7.22297100 | -5.57411300 | 0.72605700  |
| C  | 6.98954800  | -3.16030900 | -1.53906200 | H  | -7.01410200 | -3.55305400 | -0.01030800 |
| H  | 7.05646100  | -5.17818000 | -0.78588100 | C  | -6.62822000 | -6.60832800 | 1.44783300  |

|   |             |             |             |   |             |             |             |
|---|-------------|-------------|-------------|---|-------------|-------------|-------------|
| H | -4.89280400 | -7.23011200 | 2.56448900  | C | 3.35945200  | 0.79748100  | 0.43089800  |
| H | -8.21489200 | -5.70976100 | 0.29869100  | F | 3.92326400  | 1.67597600  | -0.38537900 |
| H | -7.15417500 | -7.55103800 | 1.58541800  | F | 4.27745700  | 0.23945600  | 1.20670000  |
| C | -5.21643100 | -1.13752100 | 3.38063100  | F | 2.44618500  | 1.41046700  | 1.18769900  |
| C | -4.46032000 | -2.13084300 | 4.01651900  | O | -1.35835500 | 0.33804100  | 1.20659300  |
| C | -5.12557200 | 0.17162100  | 3.86465800  | S | -2.49700000 | -0.47180800 | 0.60022000  |
| C | -3.60889700 | -1.82375100 | 5.07467700  | O | -1.79776700 | -1.37574100 | -0.40765900 |
| H | -4.56713700 | -3.16764000 | 3.69174500  | O | -3.46530600 | -1.06269300 | 1.48964400  |
| C | -4.28516500 | 0.48223800  | 4.92926300  | C | -3.38597500 | 0.75409600  | -0.46703000 |
| H | -5.71988100 | 0.95906000  | 3.40644000  | F | -2.50158700 | 1.33797500  | -1.27861500 |
| C | -3.51865600 | -0.51251100 | 5.53464600  | F | -3.95901800 | 1.67129800  | 0.29838500  |
| H | -3.03690100 | -2.61461600 | 5.55695900  | F | -4.30161700 | 0.12111700  | -1.18640800 |
| H | -4.23966600 | 1.50617200  | 5.29766100  |   |             |             |             |
| H | -2.87168900 | -0.26979200 | 6.37664300  |   |             |             |             |
| C | -7.34864900 | -0.67782600 | 2.02971700  |   |             |             |             |
| H | -7.12588500 | 0.36149600  | 1.76828900  |   |             |             |             |
| H | -7.97922300 | -1.09565000 | 1.23698300  |   |             |             |             |
| H | -7.93078900 | -0.67126600 | 2.95770400  |   |             |             |             |
| C | 0.61656200  | -3.12348900 | -0.85052200 |   |             |             |             |
| C | 1.64956000  | -2.95749100 | -1.80655300 |   |             |             |             |
| C | 0.20085000  | -4.43797400 | -0.58541700 |   |             |             |             |
| C | 2.24692500  | -4.09767800 | -2.40808200 |   |             |             |             |
| C | 2.28157900  | -1.81734900 | -2.37310400 |   |             |             |             |
| C | 0.80136200  | -5.54377400 | -1.19743400 |   |             |             |             |
| H | -0.60443300 | -4.60959700 | 0.12823300  |   |             |             |             |
| C | 1.84413000  | -5.39553800 | -2.10840200 |   |             |             |             |
| C | 3.22424900  | -2.28013400 | -3.25667500 |   |             |             |             |
| H | 2.11083600  | -0.78179200 | -2.11083500 |   |             |             |             |
| H | 0.44815600  | -6.54258500 | -0.95053300 |   |             |             |             |
| H | 2.31310000  | -6.26191900 | -2.57163700 |   |             |             |             |
| H | 3.93889500  | -1.73699800 | -3.86616300 |   |             |             |             |
| N | 3.21321000  | -3.65309700 | -3.28667200 |   |             |             |             |
| C | 4.13913600  | -4.49890200 | -3.99945000 |   |             |             |             |
| H | 3.60318100  | -5.22713000 | -4.61874400 |   |             |             |             |
| H | 4.76283800  | -3.88109400 | -4.64998200 |   |             |             |             |
| H | 4.79333500  | -5.03683800 | -3.30031600 |   |             |             |             |

Zn(OTf)<sub>2</sub>

| Atomic Type | Coordinates (Angstroms) |             |             |
|-------------|-------------------------|-------------|-------------|
|             | X                       | Y           | Z           |
| Zn          | 0.00664400              | -0.55464000 | 0.00123200  |
| O           | 1.80398800              | -1.35319700 | 0.48649300  |
| S           | 2.51786500              | -0.51565300 | -0.56615200 |
| O           | 1.38622100              | 0.23640800  | -1.25545800 |
| O           | 3.51419600              | -1.15500600 | -1.38795100 |

OTf

| Atomic Type | Coordinates (Angstroms) |             |             |
|-------------|-------------------------|-------------|-------------|
|             | X                       | Y           | Z           |
| O           | 1.23246400              | -0.56068800 | 1.32612300  |
| S           | 0.92166000              | 0.00087400  | -0.00037400 |
| O           | 1.23232900              | 1.43058100  | -0.17821400 |
| O           | 1.22718300              | -0.86901700 | -1.15001000 |
| C           | -0.92780400             | 0.00100700  | 0.00091500  |
| F           | -1.43672800             | 0.74576000  | 1.00555100  |
| F           | -1.42858200             | -1.24544200 | 0.14477100  |
| F           | -1.43641700             | 0.49667800  | -1.14839900 |

IM5

| Atomic Type | Coordinates (Angstroms) |             |             |
|-------------|-------------------------|-------------|-------------|
|             | X                       | Y           | Z           |
| O           | -3.16839900             | -1.84594600 | -1.43920300 |
| C           | -3.28859100             | -1.55531000 | -0.27038000 |
| O           | -4.28184900             | -2.02103300 | 0.51346700  |
| C           | -2.34686500             | -0.59569200 | 0.47190000  |
| N           | -1.01741800             | -1.15726800 | 0.29029600  |
| C           | -0.07971800             | -0.80866500 | 1.08572400  |
| H           | -0.23120100             | -0.15549400 | 1.96373300  |
| C           | 1.31120100              | -1.17179300 | 0.82316900  |
| C           | 2.33178900              | -0.60055100 | 1.59047700  |
| C           | 1.65332800              | -2.01433800 | -0.24378500 |
| C           | 3.66910100              | -0.84508700 | 1.29937100  |
| H           | 2.07098700              | 0.06892200  | 2.41153500  |
| C           | 2.98038300              | -2.28103700 | -0.53815300 |
| H           | 0.85080200              | -2.43916400 | -0.84383700 |
| C           | 3.97859100              | -1.68328700 | 0.23265700  |
| H           | 4.46526800              | -0.39422600 | 1.88684900  |
| H           | 3.25310300              | -2.93366300 | -1.36388600 |
| C           | -5.21054900             | -2.86809500 | -0.16768400 |

|    |             |             |             |    |             |             |             |
|----|-------------|-------------|-------------|----|-------------|-------------|-------------|
| H  | -5.68490300 | -2.32376800 | -0.99049900 | C  | -0.91614800 | -0.65188300 | 1.40195000  |
| H  | -4.70185800 | -3.74657000 | -0.57596200 | O  | -1.88564200 | -0.24065500 | 2.24590200  |
| H  | -5.94937800 | -3.15963400 | 0.57986200  | C  | -0.16124800 | 0.53896200  | 0.79402900  |
| C  | -2.76127900 | -0.35207600 | 1.91692700  | N  | 1.17553000  | 0.05258700  | 0.51650600  |
| H  | -2.15956700 | 0.44196500  | 2.37182800  | C  | 2.19325500  | 0.79655000  | 0.70492600  |
| H  | -3.81197000 | -0.05436600 | 1.97756500  | H  | 2.13961400  | 1.81556700  | 1.12849900  |
| H  | -2.63816000 | -1.26308200 | 2.51178700  | C  | 3.54203300  | 0.34263100  | 0.36257600  |
| Cl | 5.65239500  | -1.97593100 | -0.16564000 | C  | 4.63852000  | 1.17622200  | 0.60648600  |
| C  | -4.71206100 | 1.13979600  | -1.27863600 | C  | 3.76233500  | -0.91733700 | -0.21233300 |
| H  | -4.50191600 | 0.54401100  | -2.16701700 | C  | 5.93069600  | 0.77309100  | 0.29241300  |
| H  | -5.70899600 | 1.56761200  | -1.19714800 | H  | 4.47503800  | 2.15849200  | 1.05104400  |
| C  | -3.78574800 | 1.33370000  | -0.34006000 | C  | 5.04406300  | -1.33437000 | -0.53227000 |
| H  | -4.03806100 | 1.92974100  | 0.53987100  | H  | 2.90251100  | -1.55928300 | -0.39421200 |
| C  | -2.40559300 | 0.74870800  | -0.39485400 | C  | 6.11976500  | -0.48289500 | -0.27521300 |
| H  | -2.22296600 | 0.40165500  | -1.41947900 | H  | 6.78461300  | 1.41762200  | 0.48357600  |
| C  | -1.30780700 | 1.70391300  | -0.00947800 | H  | 5.22202800  | -2.31119000 | -0.97503600 |
| C  | -0.07270300 | 1.63590100  | -0.68754400 | C  | -2.76305300 | -1.28235300 | 2.67944500  |
| C  | -1.40843000 | 2.60412500  | 1.04998700  | H  | -3.15438100 | -1.82819400 | 1.81428300  |
| C  | 1.01461500  | 2.43709500  | -0.24741500 | H  | -2.23467000 | -1.98383000 | 3.33307300  |
| C  | 0.41114800  | 0.83682600  | -1.76758400 | H  | -3.56668000 | -0.78117000 | 3.22093600  |
| C  | -0.32690300 | 3.40434800  | 1.45442900  | C  | -0.26196800 | 1.79712800  | 1.64478000  |
| H  | -2.34821100 | 2.69213800  | 1.59406000  | H  | 0.19809500  | 2.65248700  | 1.13519100  |
| C  | 0.90574300  | 3.32708200  | 0.82030700  | H  | -1.30649300 | 2.04130800  | 1.84750300  |
| C  | 1.73063600  | 1.15832800  | -1.93580800 | H  | 0.24374600  | 1.66191800  | 2.60808800  |
| H  | -0.13376800 | 0.07588300  | -2.31370000 | Cl | 7.73493600  | -1.00727300 | -0.67076900 |
| H  | -0.45843900 | 4.09259500  | 2.28737700  | C  | -2.33679400 | 0.90645400  | -0.55675200 |
| H  | 1.74814700  | 3.93666400  | 1.14502400  | C  | -3.17245400 | -0.21019300 | -0.76767000 |
| H  | 2.46722400  | 0.76397900  | -2.62697500 | C  | -2.95195100 | 2.11490000  | -0.23855000 |
| N  | 2.10638300  | 2.12712800  | -1.02798000 | C  | -4.58044500 | -0.06134800 | -0.63875500 |
| C  | 3.43030900  | 2.66266100  | -0.85512500 | C  | -2.93342700 | -1.57838200 | -1.10920900 |
| H  | 3.79363300  | 2.48322000  | 0.16542200  | C  | -4.34501100 | 2.23835900  | -0.11616000 |
| H  | 4.11050100  | 2.16708700  | -1.55256300 | H  | -2.34129700 | 3.00097900  | -0.07009400 |
| H  | 3.45464300  | 3.74283000  | -1.04894900 | C  | -5.18419800 | 1.15198100  | -0.31186800 |

**IM6**

| Atomic Type | Coordinates (Angstroms) |             |             |
|-------------|-------------------------|-------------|-------------|
|             | X                       | Y           | Z           |
| C           | 0.88722900              | 1.72365700  | -2.17882800 |
| H           | 1.33254700              | 0.74328800  | -2.35097300 |
| H           | 1.34548800              | 2.56612900  | -2.69298800 |
| C           | -0.16719800             | 1.87652000  | -1.37830100 |
| H           | -0.57740800             | 2.87758800  | -1.23026700 |
| C           | -0.83485600             | 0.75268800  | -0.64357000 |
| H           | -0.60796500             | -0.18548300 | -1.16772000 |
| O           | -0.72529000             | -1.81005900 | 1.11282000  |

|   |             |             |             |
|---|-------------|-------------|-------------|
| C | -4.15516600 | -2.19129800 | -1.17363800 |
| H | -1.97512600 | -2.06312200 | -1.24627800 |
| H | -4.77141400 | 3.20758400  | 0.13602200  |
| H | -6.26547200 | 1.24621600  | -0.22072100 |
| H | -4.41510600 | -3.21936900 | -1.39840200 |
| N | -5.15799000 | -1.28571600 | -0.88701900 |
| C | -6.57252800 | -1.54875300 | -0.88947900 |
| H | -6.73915100 | -2.61260700 | -1.07597400 |
| H | -7.02135800 | -1.29235400 | 0.07873300  |
| H | -7.08510000 | -0.97331500 | -1.67143900 |

## TS4

| Atomic Type | Coordinates (Angstroms) |             |             |
|-------------|-------------------------|-------------|-------------|
|             | X                       | Y           | Z           |
| C           | 4.04506900              | 1.23775400  | -1.35871300 |
| C           | 2.98574900              | 0.33594200  | -1.16501500 |
| C           | 3.26658700              | -1.00090400 | -0.85512500 |
| C           | 4.60789300              | -1.38573600 | -0.85306500 |
| C           | 5.64588200              | -0.47569300 | -1.09031900 |
| C           | 5.38494000              | 0.86908500  | -1.32146700 |
| C           | 2.15815300              | 2.43551400  | -1.51001500 |
| C           | 1.74105500              | 1.11330100  | -1.19653400 |
| H           | 4.85380500              | -2.42197800 | -0.62490000 |
| H           | 6.67535400              | -0.82464200 | -1.06995500 |
| H           | 6.18866600              | 1.58750900  | -1.46518400 |
| H           | 1.54840000              | 3.31906600  | -1.66669700 |
| N           | 3.49094100              | 2.51429700  | -1.54691400 |
| C           | 4.28162400              | 3.71645500  | -1.72857300 |
| H           | 4.89723500              | 3.89740700  | -0.84169700 |
| H           | 4.93371900              | 3.60007900  | -2.59943100 |
| H           | 3.61684200              | 4.56661300  | -1.88698800 |
| C           | 2.18763400              | -1.93285000 | -0.34847100 |
| C           | 0.97952900              | 0.99511700  | 0.56688600  |
| H           | 1.83776800              | 1.35729800  | 1.13244600  |
| C           | 1.64202500              | -1.37863600 | 1.03348300  |
| N           | 0.65283900              | -0.31174500 | 0.80279400  |
| H           | 2.64758400              | -2.90361100 | -0.12103900 |
| C           | -0.18842200             | 1.91852700  | 0.54339900  |
| C           | -0.32537800             | 2.87747400  | 1.55207700  |
| C           | -1.20314700             | 1.80295600  | -0.41476300 |
| C           | -1.45650900             | 3.68259800  | 1.61772600  |
| H           | 0.45039500              | 2.97866500  | 2.30974800  |
| C           | -2.34384200             | 2.59588600  | -0.35908400 |
| H           | -1.10637800             | 1.11680600  | -1.25860000 |
| C           | -2.46507600             | 3.53248800  | 0.66535500  |
| H           | -1.56587200             | 4.42008900  | 2.40837900  |
| H           | -3.12589000             | 2.49493500  | -1.10721200 |
| C           | 0.92291200              | -2.48324000 | 1.81102600  |
| H           | 1.58690500              | -3.32975100 | 2.00453900  |
| H           | 0.55758300              | -2.09520900 | 2.76769200  |
| H           | 0.05204700              | -2.86952300 | 1.26171600  |
| C           | 2.85128300              | -0.93947300 | 1.87398900  |
| O           | 3.07572500              | 0.16783700  | 2.31077600  |
| O           | 3.65914000              | -1.99392100 | 2.05881000  |
| C           | 4.87146700              | -1.70850200 | 2.77848200  |

|    |             |             |             |
|----|-------------|-------------|-------------|
| H  | 4.63900700  | -1.34641700 | 3.78269100  |
| H  | 5.41142300  | -2.65372000 | 2.82161900  |
| H  | 5.45082300  | -0.94982700 | 2.24403400  |
| C  | 1.06023800  | -2.14200300 | -1.32885500 |
| C  | 0.24557100  | -3.20660200 | -1.36758800 |
| H  | 0.91688000  | -1.36548900 | -2.08538900 |
| H  | -0.53979900 | -3.29106300 | -2.11692000 |
| H  | 0.35859000  | -4.05104600 | -0.68806000 |
| Cl | -3.87446900 | 4.53058500  | 0.74488300  |
| Zn | -0.95834200 | -1.04055200 | 0.08834500  |
| O  | -2.36167900 | -1.00285700 | -1.42087300 |
| S  | -3.23649700 | -2.01816300 | -0.69706300 |
| O  | -2.48665700 | -2.26968500 | 0.60598600  |
| O  | -3.69253700 | -3.16556000 | -1.44221200 |
| C  | -4.71470300 | -1.03026200 | -0.17869300 |
| F  | -5.36590700 | -0.63797600 | -1.26361500 |
| F  | -4.29299700 | 0.03693900  | 0.50453300  |
| F  | -5.49424800 | -1.77370100 | 0.58721900  |
| H  | 0.85188200  | 0.74409800  | -1.70230100 |

## TS4'

| Atomic Type | Coordinates (Angstroms) |             |             |
|-------------|-------------------------|-------------|-------------|
|             | X                       | Y           | Z           |
| C           | -3.93162200             | 1.39795100  | -1.43081600 |
| C           | -2.93859400             | 0.46393300  | -1.10171900 |
| C           | -3.29666700             | -0.81766000 | -0.67460100 |
| C           | -4.65708700             | -1.13113900 | -0.69284000 |
| C           | -5.63120500             | -0.19263900 | -1.05864000 |
| C           | -5.29080200             | 1.10659000  | -1.41439800 |
| C           | -1.96782400             | 2.46391400  | -1.60541800 |
| C           | -1.64724500             | 1.15873600  | -1.13335700 |
| H           | -4.98153600             | -2.12971300 | -0.40922300 |
| H           | -6.67801800             | -0.48533800 | -1.04861300 |
| H           | -6.04827100             | 1.84495900  | -1.66625500 |
| H           | -1.29780200             | 3.29165300  | -1.81290200 |
| N           | -3.28879000             | 2.61527000  | -1.72014700 |
| C           | -3.99226300             | 3.83075700  | -2.08251400 |
| H           | -4.58666000             | 3.65631000  | -2.98453400 |
| H           | -4.65874800             | 4.13490900  | -1.26924100 |
| H           | -3.26943200             | 4.62477100  | -2.27444200 |
| C           | -2.23339900             | -1.74929100 | -0.13487500 |
| C           | -1.10576600             | 1.17660500  | 0.67912600  |
| H           | -2.05490900             | 1.49946700  | 1.12647600  |
| C           | -1.66739500             | -1.16917800 | 1.24558100  |
| N           | -0.70277600             | -0.08566300 | 1.00347200  |

|               |                                |             |             |    |             |             |             |
|---------------|--------------------------------|-------------|-------------|----|-------------|-------------|-------------|
| H             | -1.36915800                    | -1.73558600 | -0.82173500 | C  | -4.75320700 | -1.87509500 | -0.45192800 |
| C             | -0.04035400                    | 2.21575300  | 0.78306300  | C  | -5.91885100 | -1.10789000 | -0.56720400 |
| C             | -0.14560700                    | 3.19421700  | 1.77469300  | C  | -5.85982800 | 0.26655400  | -0.76441900 |
| C             | 1.09370900                     | 2.20640500  | -0.03750700 | C  | -2.89348000 | 2.26175900  | -1.11337600 |
| C             | 0.86826400                     | 4.12575700  | 1.96552300  | C  | -2.27610300 | 0.99006300  | -0.90456100 |
| H             | -1.02178100                    | 3.21773800  | 2.42206300  | H  | -4.84216800 | -2.94364100 | -0.25971000 |
| C             | 2.12180400                     | 3.12440400  | 0.14703500  | H  | -6.88696800 | -1.59410400 | -0.47774300 |
| H             | 1.17355700                     | 1.49968400  | -0.86535200 | H  | -6.76086300 | 0.87326200  | -0.81563400 |
| C             | 2.00243200                     | 4.07934400  | 1.15583000  | H  | -2.41711400 | 3.22562000  | -1.26118800 |
| H             | 0.78883900                     | 4.88004800  | 2.74363100  | N  | -4.22014200 | 2.16110300  | -1.05225800 |
| H             | 3.00347600                     | 3.09772300  | -0.48818800 | C  | -5.17577500 | 3.24969100  | -1.13138900 |
| C             | -2.78624500                    | -0.78002900 | 2.20222500  | H  | -5.85369900 | 3.08107200  | -1.97346800 |
| H             | -3.45647300                    | -1.62445000 | 2.38801900  | H  | -5.75985400 | 3.30280800  | -0.20719000 |
| H             | -2.37846100                    | -0.45130200 | 3.16319400  | H  | -4.64295600 | 4.19002900  | -1.27841000 |
| H             | -3.39510600                    | 0.02834400  | 1.78593500  | C  | -2.24316300 | -2.13111300 | -0.25724300 |
| C             | -0.81740500                    | -2.30366000 | 1.81974100  | C  | -1.37814500 | 0.86987400  | 0.71134100  |
| O             | 0.36125000                     | -2.48968400 | 1.47966100  | H  | -2.22867900 | 1.01167600  | 1.39246800  |
| O             | -1.43677800                    | -3.08668000 | 2.66266800  | C  | -1.50885700 | -1.58141200 | 1.03948400  |
| C             | -0.69612400                    | -4.23755300 | 3.13968600  | N  | -0.76178800 | -0.35109000 | 0.77807100  |
| H             | 0.22216400                     | -3.90840900 | 3.62927700  | C  | -0.43384300 | 2.02738500  | 0.70899600  |
| H             | -1.36427700                    | -4.72973200 | 3.84327100  | C  | -0.47515100 | 2.97647200  | 1.73345000  |
| H             | -0.45706900                    | -4.88947800 | 2.29618100  | C  | 0.53318200  | 2.16389200  | -0.29594000 |
| C             | -2.68397000                    | -3.17328700 | 0.00101700  | C  | 0.44130100  | 4.02182400  | 1.77119500  |
| C             | -2.11084800                    | -4.19216800 | -0.63838100 | H  | -1.21951600 | 2.88936400  | 2.52467600  |
| H             | -3.50468700                    | -3.36880800 | 0.69515500  | C  | 1.46206700  | 3.19710100  | -0.26818100 |
| H             | -2.45530900                    | -5.21532000 | -0.50976700 | H  | 0.56549800  | 1.46398700  | -1.13514300 |
| H             | -1.28273700                    | -4.04027200 | -1.33086200 | C  | 1.40927100  | 4.12297400  | 0.77235900  |
| Cl            | 3.27261700                     | 5.22834400  | 1.39819000  | H  | 0.41481400  | 4.75343000  | 2.57440600  |
| Zn            | 1.04805200                     | -0.76629200 | 0.56963500  | H  | 2.22097200  | 3.28227600  | -1.04121400 |
| O             | 1.60031700                     | -0.85981100 | -1.50535500 | C  | -2.48555200 | -1.46432400 | 2.20945600  |
| S             | 3.04310500                     | -0.65274700 | -1.10472600 | H  | -2.96663400 | -2.42570700 | 2.41116400  |
| O             | 3.01988400                     | -0.66416500 | 0.42519200  | H  | -1.96716800 | -1.13656000 | 3.11683500  |
| O             | 3.77432900                     | 0.42562600  | -1.73097300 | H  | -3.27829900 | -0.74356100 | 1.98502100  |
| C             | 3.87263100                     | -2.25107700 | -1.53495700 | C  | -0.45341700 | -2.64374100 | 1.36627800  |
| F             | 5.09094500                     | -2.26771700 | -1.01992000 | O  | 0.76493000  | -2.48635900 | 1.22352400  |
| F             | 3.92656000                     | -2.35759700 | -2.85405400 | O  | -0.96421800 | -3.78096600 | 1.77583100  |
| F             | 3.15301100                     | -3.25443500 | -1.03060400 | C  | -0.02231900 | -4.85161600 | 2.03218700  |
| H             | -0.74953900                    | 0.68175600  | -1.52735100 | H  | 0.67169700  | -4.55158700 | 2.81954600  |
| <b>TS5</b>    |                                |             |             | H  | -0.63297000 | -5.69598000 | 2.34580200  |
| <b>Atomic</b> | <b>Coordinates (Angstroms)</b> |             |             | H  | 0.53137000  | -5.07819300 | 1.11825600  |
| <b>Type</b>   | <b>X</b>                       | <b>Y</b>    | <b>Z</b>    | Cl | 2.55273000  | 5.41915700  | 0.81717000  |
| C             | -4.58767300                    | 0.81148200  | -0.88899900 | Zn | 1.10237800  | -0.63222700 | 0.38067700  |
| C             | -3.40802900                    | 0.05490600  | -0.82514000 | O  | 2.10066300  | -0.66192900 | -1.45109500 |
| C             | -3.47851000                    | -1.31375600 | -0.55033000 | S  | 3.34441800  | -0.07727500 | -0.80825600 |



|   |             |             |             |   |             |             |             |
|---|-------------|-------------|-------------|---|-------------|-------------|-------------|
| O | 2.98412700  | 0.04493600  | 0.66599100  | H | -1.16380100 | 1.48291800  | -1.22876900 |
| O | 3.95424400  | 1.06900800  | -1.44229300 | C | -2.03179200 | 4.18202900  | 0.60946800  |
| C | 4.56566600  | -1.46660100 | -0.83529800 | H | -0.85773800 | 5.06859100  | 2.18011100  |
| F | 5.62874500  | -1.12717300 | -0.12268300 | H | -2.98867100 | 3.11747800  | -1.00438900 |
| F | 4.91277400  | -1.71784400 | -2.08940700 | C | 0.23264700  | -2.23525500 | 1.70164600  |
| F | 3.99271700  | -2.54761300 | -0.30136500 | H | 0.71044300  | -3.16982800 | 2.00284300  |
| H | -1.41446000 | 0.77279000  | -1.53322100 | H | -0.19895400 | -1.76423800 | 2.59378400  |
| H | -2.57427200 | -3.14707700 | 0.00172000  | H | -0.57477700 | -2.51687500 | 1.00601100  |
| C | -1.28360900 | -2.22723500 | -1.41191600 | C | 2.41857600  | -1.04747300 | 1.93204400  |
| C | -0.71233100 | -3.36208900 | -1.81459200 | O | 2.79557000  | 0.01971100  | 2.36305100  |
| H | -1.02675600 | -1.29911900 | -1.92702900 | O | 3.03116500  | -2.21441200 | 2.17682900  |
| H | 0.00099200  | -3.38234700 | -2.63463400 | C | 4.22798300  | -2.11327100 | 2.97022700  |
| H | -0.94585200 | -4.31945300 | -1.34602100 | H | 3.99535800  | -1.68999200 | 3.94994200  |

TSS'

| Atomic Type | Coordinates (Angstroms) |             |             |
|-------------|-------------------------|-------------|-------------|
|             | X                       | Y           | Z           |
| C           | 3.98141800              | 0.94028900  | -1.45753100 |
| C           | 2.83087000              | 0.16745800  | -1.24193700 |
| C           | 2.94013300              | -1.15936900 | -0.81891600 |
| C           | 4.22921600              | -1.68420000 | -0.71968500 |
| C           | 5.36735600              | -0.90500000 | -0.97262500 |
| C           | 5.27045100              | 0.43551500  | -1.32578400 |
| C           | 2.22412000              | 2.29068500  | -1.79630500 |
| C           | 1.67403200              | 1.05002500  | -1.38173100 |
| H           | 4.36365600              | -2.72318900 | -0.42633300 |
| H           | 6.35085000              | -1.35891600 | -0.87668700 |
| H           | 6.15568900              | 1.04550100  | -1.49025300 |
| H           | 1.71222800              | 3.21167800  | -2.05495400 |
| N           | 3.56116600              | 2.24041600  | -1.78147100 |
| C           | 4.47000400              | 3.33793300  | -2.05052300 |
| H           | 5.08526400              | 3.54113400  | -1.16825600 |
| H           | 5.12313300              | 3.07688600  | -2.88870300 |
| H           | 3.89681500              | 4.23044700  | -2.30554300 |
| C           | 1.69168400              | -1.89068300 | -0.36937200 |
| C           | 1.00330700              | 1.16745600  | 0.45876400  |
| H           | 1.95656900              | 1.40202300  | 0.93461500  |
| C           | 1.21089700              | -1.28274400 | 1.01636200  |
| N           | 0.45892700              | -0.03879900 | 0.78297400  |
| C           | -0.00226500             | 2.26374900  | 0.44159300  |
| C           | 0.08326100              | 3.30679600  | 1.36763800  |
| C           | -1.11565000             | 2.21396100  | -0.41631300 |
| C           | -0.92243900             | 4.26335500  | 1.45299600  |
| H           | 0.93171900              | 3.35557800  | 2.04829200  |
| C           | -2.13524700             | 3.16011300  | -0.33255500 |

|    |             |             |             |
|----|-------------|-------------|-------------|
| H  | -1.16380100 | 1.48291800  | -1.22876900 |
| C  | -2.03179200 | 4.18202900  | 0.60946800  |
| H  | -0.85773800 | 5.06859100  | 2.18011100  |
| H  | -2.98867100 | 3.11747800  | -1.00438900 |
| C  | 0.23264700  | -2.23525500 | 1.70164600  |
| H  | 0.71044300  | -3.16982800 | 2.00284300  |
| H  | -0.19895400 | -1.76423800 | 2.59378400  |
| H  | -0.57477700 | -2.51687500 | 1.00601100  |
| C  | 2.41857600  | -1.04747300 | 1.93204400  |
| O  | 2.79557000  | 0.01971100  | 2.36305100  |
| O  | 3.03116500  | -2.21441200 | 2.17682900  |
| C  | 4.22798300  | -2.11327100 | 2.97022700  |
| H  | 3.99535800  | -1.68999200 | 3.94994200  |
| H  | 4.60014200  | -3.13269800 | 3.06558700  |
| H  | 4.95730000  | -1.47440300 | 2.46347500  |
| Cl | -3.27691500 | 5.37289800  | 0.71443900  |
| Zn | -1.39829600 | -0.21510900 | 0.50339500  |
| H  | 0.73719100  | 0.71045800  | -1.81924500 |
| O  | -2.20125100 | -0.93308600 | -1.37188300 |
| S  | -3.56196700 | -0.98595300 | -0.72559100 |
| O  | -4.68513700 | -0.37378700 | -1.38944500 |
| O  | -3.29818400 | -0.53197300 | 0.72658300  |
| C  | -3.91424900 | -2.79406500 | -0.52398800 |
| F  | -4.08412700 | -3.33513700 | -1.71897100 |
| F  | -2.86501500 | -3.36357900 | 0.08056600  |
| F  | -4.99610800 | -2.94983300 | 0.21685800  |
| H  | 0.87139900  | -1.64061400 | -1.06490900 |
| C  | 1.81117800  | -3.38395100 | -0.36128600 |
| C  | 1.00659300  | -4.17418500 | -1.07053900 |
| H  | 2.57911600  | -3.82167400 | 0.27732500  |
| H  | 1.10258000  | -5.25675000 | -1.05331200 |
| H  | 0.21917700  | -3.76527300 | -1.70606300 |

(6*S*,7*S*,9*R*)-3a

| Atomic Type | Coordinates (Angstroms) |            |             |
|-------------|-------------------------|------------|-------------|
|             | X                       | Y          | Z           |
| C           | -1.58806500             | 2.54366200 | 0.06546100  |
| C           | -1.37759600             | 1.13921200 | 0.17782400  |
| C           | -2.37832300             | 0.35633200 | 0.78572100  |
| C           | -3.53090400             | 1.00045700 | 1.22438000  |
| C           | -3.72100100             | 2.38251300 | 1.08730100  |
| C           | -2.74512400             | 3.18055200 | 0.50976800  |
| C           | 0.41834400              | 2.08089300 | -0.79254900 |
| C           | -0.08555700             | 0.86859000 | -0.38938400 |
| H           | -4.30529400             | 0.40261800 | 1.70624600  |

|    |             |             |             | <b>Atomic</b> | <b>Coordinates (Angstroms)</b> |             |             |
|----|-------------|-------------|-------------|---------------|--------------------------------|-------------|-------------|
|    |             |             |             | <b>Type</b>   | <b>X</b>                       | <b>Y</b>    | <b>Z</b>    |
| H  | -4.64410700 | 2.83355300  | 1.44663200  |               |                                |             |             |
| H  | -2.87555800 | 4.25686700  | 0.40832400  |               |                                |             |             |
| H  | 1.37126200  | 2.30906800  | -1.25877300 | C             | 1.82255700                     | 2.31430100  | -0.45226100 |
| N  | -0.47538700 | 3.09241300  | -0.52728300 | C             | 1.54946300                     | 0.92961400  | -0.58448300 |
| C  | -0.27716300 | 4.49467500  | -0.77896100 | C             | 2.60725700                     | 0.01424400  | -0.68254800 |
| H  | -1.03858800 | 4.88440200  | -1.46672800 | C             | 3.90063300                     | 0.52148400  | -0.69699100 |
| H  | -0.32291500 | 5.07315500  | 0.15265700  | C             | 4.15518200                     | 1.89877400  | -0.59036500 |
| H  | 0.70658400  | 4.64227300  | -1.23079000 | C             | 3.12338400                     | 2.81809700  | -0.44944600 |
| C  | -2.22170300 | -1.12118000 | 1.06688700  | C             | -0.39525600                    | 2.01979000  | -0.37692000 |
| C  | 0.60391200  | -0.44145100 | -0.64888200 | C             | 0.12849300                     | 0.76131600  | -0.53308000 |
| H  | 0.49339700  | -0.67375000 | -1.72378600 | H             | 4.73851200                     | -0.17333500 | -0.76091500 |
| C  | -1.35413100 | -1.90386300 | 0.04697100  | H             | 5.18552500                     | 2.24986400  | -0.59489000 |
| N  | 0.06463400  | -1.53690500 | 0.17057500  | H             | 3.32500100                     | 3.88251700  | -0.33820600 |
| H  | -3.22614300 | -1.56677800 | 1.02941800  | H             | -1.43004600                    | 2.33838700  | -0.31418100 |
| H  | 0.61986800  | -2.35779600 | -0.05685300 | N             | 0.61468300                     | 2.96180100  | -0.32831900 |
| C  | 2.08879200  | -0.35263100 | -0.36773400 | C             | 0.44844700                     | 4.37797900  | -0.13776900 |
| C  | 3.02100300  | -0.50705200 | -1.39182800 | H             | 0.87065100                     | 4.70673300  | 0.82113100  |
| C  | 2.55053900  | -0.11261900 | 0.93038000  | H             | 0.93931100                     | 4.93865200  | -0.94298900 |
| C  | 4.38948400  | -0.42096800 | -1.14123500 | H             | -0.61713800                    | 4.61926600  | -0.14853000 |
| H  | 2.67272500  | -0.70239300 | -2.40655200 | C             | 2.33869500                     | -1.47452300 | -0.65832200 |
| C  | 3.90886300  | -0.02823800 | 1.20346800  | C             | -0.61484400                    | -0.51375500 | -0.82471600 |
| H  | 1.82372000  | 0.00847600  | 1.73256000  | C             | 1.22413300                     | -1.86388400 | 0.36424100  |
| C  | 4.81876300  | -0.18280300 | 0.15837300  | N             | -0.13140300                    | -1.75264600 | -0.16952000 |
| H  | 5.11532000  | -0.54332100 | -1.94090800 | H             | 3.25670100                     | -1.95437100 | -0.29021600 |
| H  | 4.26858700  | 0.15681500  | 2.21257500  | H             | -0.75889400                    | -1.95377200 | 0.60534100  |
| C  | -1.44568300 | -3.39834900 | 0.37724000  | C             | 1.40609200                     | -3.34024500 | 0.74010300  |
| H  | -2.48866800 | -3.73325500 | 0.40291400  | H             | 2.36855300                     | -3.50566300 | 1.23704100  |
| H  | -0.91114400 | -3.98983100 | -0.37557700 | H             | 0.60907000                     | -3.66980200 | 1.41788600  |
| H  | -1.00290800 | -3.58271700 | 1.36207200  | H             | 1.35758300                     | -3.95112200 | -0.16729400 |
| C  | -1.87795900 | -1.78115900 | -1.38729400 | C             | 1.37933000                     | -1.05594000 | 1.66166400  |
| O  | -1.21589500 | -2.02432200 | -2.37549900 | O             | 0.46089600                     | -0.58266900 | 2.29894700  |
| O  | -3.18092200 | -1.43910500 | -1.43296400 | O             | 2.66690300                     | -0.99329800 | 2.05322000  |
| C  | -3.72227300 | -1.34005200 | -2.75209000 | C             | 2.90666600                     | -0.17358900 | 3.19811700  |
| H  | -3.65086700 | -2.30088900 | -3.27096200 | H             | 2.31975800                     | -0.51838100 | 4.05445400  |
| H  | -4.76431900 | -1.04675000 | -2.62136600 | H             | 3.97535800                     | -0.25331900 | 3.40090200  |
| H  | -3.17827600 | -0.58661500 | -3.32939800 | H             | 2.63781900                     | 0.86503300  | 2.97553300  |
| C  | -1.69638600 | -1.29346100 | 2.46578400  | C             | 2.05812800                     | -2.03332000 | -2.02366100 |
| C  | -2.37525300 | -1.86745000 | 3.45774200  | C             | 2.78087800                     | -2.99270700 | -2.59966200 |
| H  | -0.69784000 | -0.88962500 | 2.64048300  | H             | 1.21564300                     | -1.59690100 | -2.56425600 |
| H  | -1.96925200 | -1.94746500 | 4.46399000  | H             | 2.55695300                     | -3.36340700 | -3.59747900 |
| H  | -3.37343900 | -2.27973800 | 3.30229900  | H             | 3.63265500                     | -3.44569700 | -2.09086700 |
| Cl | 6.53012900  | -0.07771200 | 0.49071200  | H             | -0.51525100                    | -0.68630200 | -1.91288600 |
|    |             |             |             | C             | -2.09178700                    | -0.36918800 | -0.54184100 |
|    |             |             |             | C             | -3.03974500                    | -0.47702400 | -1.55751500 |

(6S,7S,9S)-3a

|    |             |             |             |
|----|-------------|-------------|-------------|
| C  | -2.52847400 | -0.11952500 | 0.76486900  |
| C  | -4.39938600 | -0.33631700 | -1.29158900 |
| H  | -2.71227700 | -0.67877600 | -2.57731400 |
| C  | -3.88131700 | 0.02222000  | 1.05001900  |
| H  | -1.78802200 | -0.03431600 | 1.56148700  |
| C  | -4.80631400 | -0.08729300 | 0.01420600  |
| H  | -5.13742000 | -0.42502200 | -2.08443400 |
| H  | -4.22186000 | 0.21709900  | 2.06396600  |
| Cl | -6.50863700 | 0.08783800  | 0.36246800  |

(6R,7S,9S)-3a

| Atomic Type | Coordinates (Angstroms) |             |             |
|-------------|-------------------------|-------------|-------------|
|             | X                       | Y           | Z           |
| C           | 0.90501600              | 3.16473800  | -0.04756400 |
| C           | 1.04701300              | 1.74799200  | -0.09565300 |
| C           | 2.28804200              | 1.18400700  | 0.27043300  |
| C           | 3.30689300              | 2.05472300  | 0.64861800  |
| C           | 3.14258900              | 3.44615400  | 0.68157000  |
| C           | 1.93122000              | 4.02524900  | 0.33701800  |
| C           | -1.03783500             | 2.30752100  | -0.73245100 |
| C           | -0.21344100             | 1.22582400  | -0.54757400 |
| H           | 4.26551600              | 1.62775000  | 0.94557000  |
| H           | 3.97652500              | 4.07635200  | 0.98441400  |
| H           | 1.78712100              | 5.10437700  | 0.36271900  |
| H           | -2.07533200             | 2.33692200  | -1.04848500 |
| N           | -0.37571900             | 3.47720400  | -0.44028300 |
| C           | -0.92797500             | 4.80476700  | -0.48402800 |
| H           | -0.33826300             | 5.45211600  | -1.14525000 |
| H           | -0.95208200             | 5.25953100  | 0.51484400  |
| H           | -1.94952400             | 4.75531900  | -0.86839700 |
| C           | 2.56464300              | -0.30240800 | 0.35118400  |
| C           | -0.59326900             | -0.19801200 | -0.85403900 |
| H           | -0.55926600             | -0.33230900 | -1.95669500 |
| C           | 1.69617000              | -1.17396800 | -0.59815000 |
| N           | 0.29208900              | -1.13580800 | -0.17332500 |
| C           | -2.01961100             | -0.48220200 | -0.43603400 |
| C           | -3.01938600             | -0.66648200 | -1.38917400 |
| C           | -2.36490900             | -0.52670900 | 0.91832700  |
| C           | -4.34364100             | -0.88282700 | -1.01404900 |
| H           | -2.76021600             | -0.64016000 | -2.44820800 |
| C           | -3.67719300             | -0.74941500 | 1.31402100  |
| H           | -1.58441900             | -0.38397900 | 1.66432900  |
| C           | -4.65846300             | -0.92130800 | 0.33868000  |
| H           | -5.12212300             | -1.02384900 | -1.75932100 |
| H           | -3.94703700             | -0.78560200 | 2.36662900  |

|    |             |             |             |
|----|-------------|-------------|-------------|
| C  | 1.95079600  | -0.78741200 | -2.06322200 |
| H  | 3.01511200  | -0.88770400 | -2.29829300 |
| H  | 1.38584400  | -1.43234700 | -2.74757400 |
| H  | 1.65892300  | 0.25128900  | -2.25100000 |
| C  | 2.13810900  | -2.63105100 | -0.43231500 |
| O  | 1.39531400  | -3.56321800 | -0.20874800 |
| O  | 3.46589400  | -2.76627900 | -0.60396100 |
| C  | 3.95272400  | -4.09772100 | -0.41910800 |
| H  | 3.48014200  | -4.78369400 | -1.12823600 |
| H  | 5.02831800  | -4.04436000 | -0.59134300 |
| H  | 3.74017300  | -4.43886800 | 0.59885200  |
| H  | -0.08447300 | -2.07804100 | -0.25470900 |
| Cl | -6.31331700 | -1.18755400 | 0.82594200  |
| H  | 3.61191700  | -0.45887200 | 0.05652700  |
| C  | 2.42005700  | -0.77507600 | 1.77232200  |
| C  | 3.40510200  | -1.32703900 | 2.47995400  |
| H  | 1.42694200  | -0.64872400 | 2.20616000  |
| H  | 3.26293400  | -1.65724600 | 3.50689400  |
| H  | 4.39949200  | -1.46936900 | 2.05390100  |

(6R,7S,9R)-3a

| Atomic Type | Coordinates (Angstroms) |             |             |
|-------------|-------------------------|-------------|-------------|
|             | X                       | Y           | Z           |
| C           | -1.69006100             | 2.98176700  | -0.07751500 |
| C           | -1.53112900             | 1.57777700  | -0.04380900 |
| C           | -2.61937500             | 0.74947300  | 0.27672500  |
| C           | -3.81707900             | 1.36598900  | 0.61729200  |
| C           | -3.95021100             | 2.76629100  | 0.61810700  |
| C           | -2.89924800             | 3.59660300  | 0.25247500  |
| C           | 0.42316500              | 2.49100200  | -0.63928400 |
| C           | -0.17645400             | 1.28324500  | -0.38951200 |
| H           | -4.68232600             | 0.74854200  | 0.85939800  |
| H           | -4.90775800             | 3.20702600  | 0.88970400  |
| H           | -3.01817900             | 4.67880400  | 0.22773000  |
| H           | 1.44972800              | 2.71956900  | -0.90449400 |
| N           | -0.48271200             | 3.52207700  | -0.46369200 |
| C           | -0.21021900             | 4.92671500  | -0.61188200 |
| H           | -0.35758300             | 5.46188500  | 0.33541600  |
| H           | -0.86283900             | 5.37873700  | -1.36981500 |
| H           | 0.82785400              | 5.05966300  | -0.92632600 |
| C           | -2.51227700             | -0.73919900 | 0.04746000  |
| C           | 0.42087800              | -0.09219100 | -0.28135100 |
| C           | -1.37930900             | -1.44542500 | 0.87476800  |
| N           | -0.12140400             | -0.70055700 | 0.95880100  |
| H           | 0.16247300              | -0.70695700 | -1.16263400 |

|    |             |             |             |   |             |             |             |
|----|-------------|-------------|-------------|---|-------------|-------------|-------------|
| C  | 1.92619500  | -0.08898400 | -0.18449400 | N | -0.77424700 | 3.16408300  | -0.54914600 |
| C  | 2.69488400  | -0.88477000 | -1.03430900 | C | -0.70635400 | 4.58086100  | -0.83043000 |
| C  | 2.57544700  | 0.65967400  | 0.80318500  | H | -1.48464100 | 4.86438300  | -1.54674700 |
| C  | 4.08215700  | -0.92188700 | -0.92803000 | H | -0.83656700 | 5.16723900  | 0.08605500  |
| H  | 2.19680200  | -1.49646500 | -1.78603800 | H | 0.26817400  | 4.81466600  | -1.26311700 |
| C  | 3.95964500  | 0.63260500  | 0.92883600  | C | -2.09377200 | -1.09273900 | 1.19802000  |
| H  | 1.98027500  | 1.26845900  | 1.48255500  | C | 0.63052400  | -0.20609600 | -0.62510500 |
| C  | 4.70161200  | -0.15697200 | 0.05386300  | H | 0.43900500  | -0.51990700 | -1.65746400 |
| H  | 4.67886200  | -1.54033400 | -1.59334700 | C | -1.27770400 | -1.94890600 | 0.20048700  |
| H  | 4.46449400  | 1.21333500  | 1.69691100  | N | 0.17616800  | -1.47387900 | 0.15929400  |
| Cl | 6.44201700  | -0.18759900 | 0.19596600  | H | -3.01035600 | -1.67312200 | 1.36597900  |
| H  | 0.57642800  | -1.36325600 | 1.29118500  | H | 0.73503500  | -2.23338600 | -0.24307100 |
| C  | -1.87149600 | -1.61404800 | 2.31472300  | C | 2.11557700  | -0.10602900 | -0.40323300 |
| H  | -2.76074200 | -2.25011600 | 2.36500000  | C | 2.99023000  | -0.73061500 | -1.29830900 |
| H  | -1.09206800 | -2.06133400 | 2.94347100  | C | 2.64012800  | 0.54561700  | 0.71867100  |
| H  | -2.10716100 | -0.62693900 | 2.72698500  | C | 4.36320800  | -0.70622900 | -1.08719500 |
| C  | -1.14034400 | -2.82146200 | 0.24039700  | H | 2.59409800  | -1.22940100 | -2.18409900 |
| O  | -0.09616400 | -3.18377100 | -0.25971600 | C | 4.00971900  | 0.57492800  | 0.94484000  |
| O  | -2.24065400 | -3.60011300 | 0.31131000  | H | 1.96836700  | 1.05610300  | 1.40927800  |
| C  | -2.11102400 | -4.86385100 | -0.34433600 | C | 4.86442100  | -0.05405100 | 0.03847800  |
| H  | -1.29989100 | -5.44749300 | 0.10088100  | H | 5.04490800  | -1.17866700 | -1.78900300 |
| H  | -3.06895600 | -5.36773800 | -0.20875400 | H | 4.42166000  | 1.08361000  | 1.81231900  |
| H  | -1.89860600 | -4.71647000 | -1.40831200 | C | -1.22031100 | -3.40611000 | 0.65781700  |
| H  | -3.44024200 | -1.21596400 | 0.39382500  | H | -2.23268700 | -3.81996200 | 0.68699200  |
| C  | -2.43808900 | -0.97727200 | -1.44411200 | H | -0.62989500 | -4.02145500 | -0.03145300 |
| C  | -3.20745300 | -1.83692700 | -2.11110100 | H | -0.79561900 | -3.48235200 | 1.66529700  |
| H  | -1.73448600 | -0.35335900 | -1.99869100 | C | -1.79857800 | -1.94338200 | -1.23236500 |
| H  | -3.13577900 | -1.94794800 | -3.19098100 | O | -1.07008700 | -2.03317700 | -2.19949600 |
| H  | -3.94252200 | -2.46094200 | -1.60218000 | O | -3.12390900 | -1.93477500 | -1.24746800 |

(6*S*,7*S*,9*R*)-**3a**-H<sup>+</sup>

| Atomic Type | Coordinates (Angstroms) |            |             |
|-------------|-------------------------|------------|-------------|
|             | X                       | Y          | Z           |
| C           | -1.88043000             | 2.50754400 | -0.05643300 |
| C           | -1.53281600             | 1.14295000 | 0.12916200  |
| C           | -2.48016600             | 0.27926800 | 0.71131500  |
| C           | -3.74065100             | 0.78479300 | 1.00023100  |
| C           | -4.07648600             | 2.12577100 | 0.75837600  |
| C           | -3.14246400             | 3.01456200 | 0.24983300  |
| C           | 0.24583800              | 2.26532500 | -0.68091100 |
| C           | -0.16503700             | 1.00710800 | -0.28752200 |
| H           | -4.47905100             | 0.12531600 | 1.45513600  |
| H           | -5.07611500             | 2.47716000 | 1.00194300  |
| H           | -3.38440400             | 4.06460400 | 0.09910200  |
| H           | 1.20169100              | 2.58155800 | -1.08406400 |

|    |             |             |             |
|----|-------------|-------------|-------------|
| N  | -0.77424700 | 3.16408300  | -0.54914600 |
| C  | -0.70635400 | 4.58086100  | -0.83043000 |
| H  | -1.48464100 | 4.86438300  | -1.54674700 |
| H  | -0.83656700 | 5.16723900  | 0.08605500  |
| H  | 0.26817400  | 4.81466600  | -1.26311700 |
| C  | -2.09377200 | -1.09273900 | 1.19802000  |
| C  | 0.63052400  | -0.20609600 | -0.62510500 |
| H  | 0.43900500  | -0.51990700 | -1.65746400 |
| C  | -1.27770400 | -1.94890600 | 0.20048700  |
| N  | 0.17616800  | -1.47387900 | 0.15929400  |
| H  | -3.01035600 | -1.67312200 | 1.36597900  |
| H  | 0.73503500  | -2.23338600 | -0.24307100 |
| C  | 2.11557700  | -0.10602900 | -0.40323300 |
| C  | 2.99023000  | -0.73061500 | -1.29830900 |
| C  | 2.64012800  | 0.54561700  | 0.71867100  |
| C  | 4.36320800  | -0.70622900 | -1.08719500 |
| H  | 2.59409800  | -1.22940100 | -2.18409900 |
| C  | 4.00971900  | 0.57492800  | 0.94484000  |
| H  | 1.96836700  | 1.05610300  | 1.40927800  |
| C  | 4.86442100  | -0.05405100 | 0.03847800  |
| H  | 5.04490800  | -1.17866700 | -1.78900300 |
| H  | 4.42166000  | 1.08361000  | 1.81231900  |
| C  | -1.22031100 | -3.40611000 | 0.65781700  |
| H  | -2.23268700 | -3.81996200 | 0.68699200  |
| H  | -0.62989500 | -4.02145500 | -0.03145300 |
| H  | -0.79561900 | -3.48235200 | 1.66529700  |
| C  | -1.79857800 | -1.94338200 | -1.23236500 |
| O  | -1.07008700 | -2.03317700 | -2.19949600 |
| O  | -3.12390900 | -1.93477500 | -1.24746800 |
| C  | -3.72441600 | -2.00400400 | -2.55901000 |
| H  | -3.39879300 | -2.91163200 | -3.07224900 |
| H  | -4.79822500 | -2.01591200 | -2.38146600 |
| H  | -3.43397700 | -1.12777100 | -3.14291400 |
| C  | -1.37008600 | -0.95285100 | 2.51925000  |
| C  | -1.57296400 | -1.71918800 | 3.59169100  |
| H  | -0.67637800 | -0.10805900 | 2.58718300  |
| H  | -1.04914100 | -1.54406100 | 4.52811800  |
| H  | -2.29565700 | -2.53542300 | 3.58586400  |
| Cl | 6.57076100  | -0.01694700 | 0.31365500  |
| H  | 0.47970700  | -1.38439300 | 1.13897300  |

(6*S*,7*S*,9*S*)-**3a**-H<sup>+</sup>

| Atomic Type | Coordinates (Angstroms) |            |             |
|-------------|-------------------------|------------|-------------|
|             | X                       | Y          | Z           |
| C           | 1.88742600              | 2.30757400 | -0.48885700 |

|   |             |             |             |                                                         |             |             |             |
|---|-------------|-------------|-------------|---------------------------------------------------------|-------------|-------------|-------------|
| C | 1.56157400  | 0.93610200  | -0.61767900 | H                                                       | -1.86131500 | 0.38673300  | 1.58311000  |
| C | 2.58371200  | -0.01318300 | -0.76895000 | C                                                       | -4.86916000 | -0.02525300 | 0.07316900  |
| C | 3.89202000  | 0.44600200  | -0.83136100 | H                                                       | -5.18428200 | -0.63112500 | -1.96795300 |
| C | 4.19655600  | 1.81361200  | -0.72870600 | H                                                       | -4.29046100 | 0.56259300  | 2.06357200  |
| C | 3.20375500  | 2.76537500  | -0.54102800 | Cl                                                      | -6.56006100 | 0.10929500  | 0.40764800  |
| C | -0.33369300 | 2.11392200  | -0.31965000 | H                                                       | -0.61817000 | -2.43016700 | -0.28095800 |
| C | 0.13700000  | 0.83132700  | -0.50207300 | H                                                       | -0.57784600 | -1.44219900 | 1.05590000  |
| H | 4.70272900  | -0.27359900 | -0.94096300 | <b>(6<i>R</i>,7<i>S</i>,9<i>S</i>)-3a-H<sup>+</sup></b> |             |             |             |
| H | 5.23551400  | 2.13010900  | -0.77846800 | <b>Atomic Coordinates (Angstroms)</b>                   |             |             |             |
| H | 3.44730000  | 3.82094100  | -0.43944800 | <b>Type</b>                                             | <b>X</b>    | <b>Y</b>    | <b>Z</b>    |
| H | -1.35230000 | 2.47239900  | -0.22441000 | C                                                       | 1.38977100  | 3.10814100  | -0.06374900 |
| N | 0.70763700  | 3.00140200  | -0.31145200 | C                                                       | 1.32876600  | 1.68817700  | -0.10471000 |
| C | 0.60443100  | 4.43375500  | -0.14110100 | C                                                       | 2.49021400  | 0.95780300  | 0.22817900  |
| H | 1.11583100  | 4.75387200  | 0.77354600  | C                                                       | 3.64449800  | 1.66870000  | 0.53611200  |
| H | 1.04826300  | 4.95404300  | -0.99665700 | C                                                       | 3.68288900  | 3.07059000  | 0.54246100  |
| H | -0.44857100 | 4.71239600  | -0.07057300 | C                                                       | 2.54920000  | 3.81271400  | 0.25610400  |
| C | 2.26200900  | -1.48943600 | -0.76927400 | C                                                       | -0.69419300 | 2.55100400  | -0.62151500 |
| C | -0.67880100 | -0.37902000 | -0.75003700 | C                                                       | -0.02183500 | 1.35525900  | -0.47459500 |
| C | 1.29578900  | -1.88018800 | 0.38779900  | H                                                       | 4.54315500  | 1.11356100  | 0.80340100  |
| N | -0.18135800 | -1.59169500 | 0.11289200  | H                                                       | 4.61193800  | 3.57831600  | 0.78926400  |
| H | 3.18542200  | -2.02657400 | -0.51169100 | H                                                       | 2.56368500  | 4.90033300  | 0.27871000  |
| C | 1.38154200  | -3.37172400 | 0.69746200  | H                                                       | -1.72751400 | 2.72907500  | -0.89840800 |
| H | 2.38667500  | -3.61702200 | 1.05200800  | N                                                       | 0.14328500  | 3.60053900  | -0.38163500 |
| H | 0.67167700  | -3.66794100 | 1.47911000  | C                                                       | -0.20888500 | 5.00264000  | -0.42557400 |
| H | 1.18578500  | -3.96179900 | -0.20609000 | H                                                       | 0.41767700  | 5.53251200  | -1.15094500 |
| C | 1.57711800  | -1.09413700 | 1.67451200  | H                                                       | -0.08186700 | 5.46599500  | 0.55903100  |
| O | 0.69150900  | -0.60730900 | 2.35294300  | H                                                       | -1.25320100 | 5.10030500  | -0.72777100 |
| O | 2.86797000  | -1.09011600 | 1.95289000  | C                                                       | 2.49224800  | -0.53909700 | 0.41909300  |
| C | 3.25358600  | -0.30483300 | 3.10113500  | C                                                       | -0.63266400 | 0.04879900  | -0.85635700 |
| H | 2.70443600  | -0.63299700 | 3.98603300  | H                                                       | -0.53658200 | -0.14366600 | -1.93527100 |
| H | 4.32354600  | -0.46907400 | 3.21492600  | C                                                       | 1.61227000  | -1.32004700 | -0.58162200 |
| H | 3.04106200  | 0.74936500  | 2.90058400  | N                                                       | 0.14023200  | -1.11511500 | -0.23640200 |
| C | 1.80267900  | -1.99944900 | -2.11268300 | H                                                       | 0.06873600  | -1.05719000 | 0.78872200  |
| C | 2.14946200  | -3.17776000 | -2.63179700 | C                                                       | -2.07768300 | -0.12432800 | -0.46599000 |
| H | 1.19115800  | -1.31646400 | -2.70629600 | C                                                       | -2.98902800 | -0.67248800 | -1.37101700 |
| H | 1.81453500  | -3.48990400 | -3.61776200 | C                                                       | -2.51310900 | 0.21102600  | 0.82149400  |
| H | 2.81037100  | -3.86636200 | -2.10466100 | C                                                       | -4.31511800 | -0.87924600 | -1.00922700 |
| H | -0.53724700 | -0.74913800 | -1.77434600 | H                                                       | -2.66542200 | -0.93189900 | -2.37946000 |
| C | -2.14755000 | -0.24696200 | -0.46630300 | C                                                       | -3.83133200 | -0.00034600 | 1.20109200  |
| C | -3.08932800 | -0.53434300 | -1.45580500 | H                                                       | -1.81770100 | 0.66476900  | 1.52902300  |
| C | -2.58800800 | 0.15004000  | 0.80354900  | C                                                       | -4.72708600 | -0.54437900 | 0.27924900  |
| C | -4.44993400 | -0.41824000 | -1.19640000 | H                                                       | -5.02749400 | -1.29378700 | -1.71655200 |
| H | -2.75965400 | -0.84128400 | -2.44833700 | H                                                       | -4.17324800 | 0.26086100  | 2.19890900  |
| C | -3.94438600 | 0.25792500  | 1.07958800  | C                                                       | 1.89069900  | -0.96250300 | -2.03369100 |

|    |             |             |             |    |             |             |             |
|----|-------------|-------------|-------------|----|-------------|-------------|-------------|
| H  | 2.93427000  | -1.20496200 | -2.25393100 | C  | -2.71957600 | -0.80444800 | 1.01752000  |
| H  | 1.26215200  | -1.53505600 | -2.72573900 | C  | -2.61909700 | 0.85890900  | -0.72483200 |
| H  | 1.75263900  | 0.10676200  | -2.21769000 | C  | -4.10397500 | -0.84275400 | 0.91455600  |
| C  | 1.78552200  | -2.83802500 | -0.40522300 | H  | -2.21894500 | -1.45244300 | 1.73639000  |
| O  | 0.84096900  | -3.59584600 | -0.29476400 | C  | -4.00221600 | 0.82505200  | -0.84508200 |
| O  | 3.05961600  | -3.19114100 | -0.44768200 | H  | -2.04697100 | 1.53215300  | -1.36387500 |
| C  | 3.30708400  | -4.61145700 | -0.32750200 | C  | -4.73827700 | -0.02393000 | -0.01759200 |
| H  | 2.79515800  | -5.14636200 | -1.13000200 | H  | -4.69207500 | -1.50067800 | 1.54804300  |
| H  | 4.38697400  | -4.72104900 | -0.40703500 | H  | -4.51385200 | 1.45109600  | -1.57110800 |
| H  | 2.94363300  | -4.96655800 | 0.64000300  | Cl | -6.46116500 | -0.05945900 | -0.15418900 |
| H  | -0.32815500 | -2.00738100 | -0.47043800 | H  | -0.60252700 | -1.47995900 | -1.10706000 |
| Cl | -6.37385200 | -0.79490100 | 0.73949700  | H  | 0.10821200  | -0.08720500 | -1.69217000 |
| H  | 3.50870300  | -0.91220700 | 0.23920200  | C  | 1.97806900  | -1.52074700 | -2.26707400 |
| C  | 2.11788900  | -0.87487300 | 1.84776800  | H  | 2.85325400  | -2.17394900 | -2.30964000 |
| C  | 2.68026200  | -1.84105100 | 2.57481400  | H  | 1.24033900  | -1.90893000 | -2.97924900 |
| H  | 1.36150200  | -0.23029900 | 2.30848100  | H  | 2.29017100  | -0.51748500 | -2.58269800 |
| H  | 2.38572500  | -2.02760900 | 3.60425600  | C  | 1.05116800  | -2.88084000 | -0.36093400 |
| H  | 3.47916400  | -2.46530600 | 2.17506500  | O  | -0.09011000 | -3.18942800 | -0.07631900 |

(6R,7S,9R)-3a-H<sup>+</sup>

| Atomic Type | Coordinates (Angstroms) |             |             |
|-------------|-------------------------|-------------|-------------|
|             | X                       | Y           | Z           |
| C           | 1.85980700              | 2.92659400  | 0.05201000  |
| C           | 1.62526700              | 1.53307100  | 0.07504000  |
| C           | 2.69238800              | 0.63824200  | -0.12813200 |
| C           | 3.94294900              | 1.17644800  | -0.40224700 |
| C           | 4.15016600              | 2.56621900  | -0.45627300 |
| C           | 3.12040200              | 3.46286800  | -0.21443000 |
| C           | -0.31130700             | 2.60730100  | 0.48581300  |
| C           | 0.22910600              | 1.34710600  | 0.33698100  |
| H           | 4.79048200              | 0.50710500  | -0.54701200 |
| H           | 5.14683300              | 2.94413600  | -0.67045900 |
| H           | 3.29432500              | 4.53676500  | -0.23025900 |
| H           | -1.33039600             | 2.90495200  | 0.70473700  |
| N           | 0.66217300              | 3.55618200  | 0.32462100  |
| C           | 0.48202000              | 4.98814900  | 0.42519600  |
| H           | 0.76660900              | 5.47870600  | -0.51197600 |
| H           | 1.09036500              | 5.39724600  | 1.23907300  |
| H           | -0.56800400             | 5.20482300  | 0.62985400  |
| C           | 2.48715200              | -0.83832800 | 0.11552500  |
| C           | -0.46551400             | 0.03556600  | 0.33024400  |
| C           | 1.43652100              | -1.48072600 | -0.84282800 |
| N           | 0.09305900              | -0.74635800 | -0.90811300 |
| H           | -0.18560400             | -0.62149700 | 1.16348300  |
| C           | -1.96222700             | 0.05251200  | 0.21294600  |

|   |            |             |             |
|---|------------|-------------|-------------|
| C | 1.85422100 | -5.01224700 | 0.16673900  |
| H | 1.10844100 | -5.50669800 | -0.45920000 |
| H | 2.81360900 | -5.52388900 | 0.11243900  |
| H | 1.49406200 | -4.95854900 | 1.19724300  |
| H | 3.41013100 | -1.36979800 | -0.15534500 |
| C | 2.24981500 | -1.08948000 | 1.58927700  |
| C | 2.82669600 | -2.06739200 | 2.28675400  |
| H | 1.62473700 | -0.36300600 | 2.11119300  |
| H | 2.65859100 | -2.17671400 | 3.35524400  |
| H | 3.50645700 | -2.78228500 | 1.82442800  |

TS6

| Atomic Type | Coordinates (Angstroms) |            |             |
|-------------|-------------------------|------------|-------------|
|             | X                       | Y          | Z           |
| C           | -1.78594600             | 2.62482500 | -0.28361900 |
| C           | -1.47748100             | 1.26277800 | -0.04860600 |
| C           | -2.52813200             | 0.37892200 | 0.28480300  |
| C           | -3.82710700             | 0.88250200 | 0.16247600  |
| C           | -4.10549100             | 2.20969900 | -0.17583700 |
| C           | -3.07847400             | 3.12541300 | -0.36032000 |
| C           | 0.44250100              | 2.47666600 | -0.25590300 |
| C           | -0.03299200             | 1.16700700 | -0.09015500 |
| H           | -4.65873500             | 0.21905600 | 0.39678500  |
| H           | -5.13963300             | 2.53852600 | -0.24231000 |
| H           | -3.27874400             | 4.17811500 | -0.54632800 |
| H           | 1.46004100              | 2.81449600 | -0.41715000 |

|               |                                |             |             |   |             |             |             |
|---------------|--------------------------------|-------------|-------------|---|-------------|-------------|-------------|
| N             | -0.58933000                    | 3.32927200  | -0.40048600 | C | 0.90110900  | 1.80341100  | -0.15135900 |
| C             | -0.49918900                    | 4.74614000  | -0.68625800 | C | 2.15930700  | 1.16011200  | -0.07332700 |
| H             | -0.99979300                    | 4.97199500  | -1.63336700 | C | 3.28024600  | 1.99368200  | -0.20239600 |
| H             | -0.97128400                    | 5.32510400  | 0.11435300  | C | 3.21053400  | 3.38388600  | -0.30123100 |
| H             | 0.55106900                     | 5.03325500  | -0.76002900 | C | 1.98651300  | 4.03431000  | -0.22370400 |
| C             | -2.38660900                    | -0.93592800 | 1.03487500  | C | -1.25940300 | 2.56290500  | 0.03093100  |
| C             | 0.77567100                     | 0.05362600  | -0.42200200 | C | -0.49349400 | 1.37944700  | -0.11031800 |
| H             | 0.37304800                     | -0.63772200 | -1.15564500 | H | 4.26504400  | 1.52954200  | -0.17280500 |
| C             | -1.44818100                    | -2.05178800 | 0.49326500  | H | 4.12738600  | 3.96192300  | -0.38396700 |
| N             | -0.04420400                    | -1.72457600 | 0.77643600  | H | 1.91216500  | 5.11919600  | -0.21953100 |
| H             | -3.38490900                    | -1.39184600 | 1.03609200  | H | -2.33761200 | 2.67595600  | 0.01232400  |
| H             | 0.56305700                     | -2.42930900 | 0.36006100  | N | -0.46386100 | 3.63213000  | -0.02776100 |
| C             | 2.19899600                     | -0.00787200 | -0.23371800 | C | -0.88681300 | 5.01887300  | -0.04313500 |
| C             | 2.95502100                     | -0.87054700 | -1.05379900 | H | -0.58110900 | 5.49179400  | -0.98162100 |
| C             | 2.86503200                     | 0.73882200  | 0.75953000  | H | -0.43029300 | 5.55624700  | 0.79387500  |
| C             | 4.32991600                     | -0.95198400 | -0.92494100 | H | -1.97264500 | 5.06690300  | 0.04959200  |
| H             | 2.44377100                     | -1.46837400 | -1.80859000 | C | 2.45583900  | -0.26080600 | 0.38663400  |
| C             | 4.23882900                     | 0.66258800  | 0.89999600  | C | -1.09131900 | 0.20680000  | -0.57292500 |
| H             | 2.28779000                     | 1.36292100  | 1.44034600  | H | -0.51085700 | -0.40067300 | -1.25517800 |
| C             | 4.96612300                     | -0.17827100 | 0.05059700  | C | 1.98532500  | -1.48549200 | -0.46506900 |
| H             | 4.91619200                     | -1.60488700 | -1.56554000 | N | 0.62845500  | -1.87128900 | -0.08829300 |
| H             | 4.75689500                     | 1.23177500  | 1.66685100  | H | 0.65747000  | -2.24224700 | 0.86152500  |
| C             | -1.83272100                    | -3.39021100 | 1.14404100  | C | -2.42912800 | -0.22868800 | -0.33081800 |
| H             | -2.85944000                    | -3.67338900 | 0.88880900  | C | -3.00161400 | -1.17469800 | -1.21004500 |
| H             | -1.16493100                    | -4.19143100 | 0.80709600  | C | -3.19388100 | 0.20812800  | 0.77474100  |
| H             | -1.75739800                    | -3.31187400 | 2.23458000  | C | -4.29638700 | -1.62214000 | -1.03654000 |
| C             | -1.57749400                    | -2.23515400 | -1.01463800 | H | -2.41371900 | -1.53990300 | -2.05120400 |
| O             | -0.63139600                    | -2.38709900 | -1.76480900 | C | -4.48645200 | -0.24093000 | 0.96506400  |
| O             | -2.85631400                    | -2.26854400 | -1.38703800 | H | -2.74253800 | 0.86948400  | 1.51269600  |
| C             | -3.08112300                    | -2.49924000 | -2.79115100 | C | -5.03818800 | -1.14655900 | 0.05021300  |
| H             | -2.66538500                    | -3.46642200 | -3.08420600 | H | -4.74000200 | -2.33838500 | -1.72201400 |
| H             | -4.16282600                    | -2.48617200 | -2.91678500 | H | -5.07033900 | 0.07868000  | 1.82360500  |
| H             | -2.60979900                    | -1.70822900 | -3.37973200 | C | 2.05882800  | -1.18031700 | -1.95679600 |
| C             | -2.03380400                    | -0.60199400 | 2.46503200  | H | 3.07616600  | -0.89578000 | -2.24192600 |
| C             | -2.71256000                    | -1.02131500 | 3.53168500  | H | 1.77456000  | -2.05238500 | -2.55848800 |
| H             | -1.17083600                    | 0.05735800  | 2.59710700  | H | 1.39408400  | -0.34867700 | -2.22051000 |
| H             | -2.42570000                    | -0.73892500 | 4.54172400  | C | 2.93413600  | -2.66106400 | -0.14265900 |
| H             | -3.59473900                    | -1.65460800 | 3.43602200  | O | 2.56177300  | -3.71039800 | 0.33245600  |
| Cl            | 6.67773200                     | -0.27912400 | 0.22813500  | O | 4.20784400  | -2.38354700 | -0.46389200 |
| H             | 0.11856200                     | -1.72014100 | 1.78255800  | C | 5.14119200  | -3.44307400 | -0.18850300 |
| TS7           |                                |             |             | H | 4.85962600  | -4.34630200 | -0.73564200 |
| <b>Atomic</b> | <b>Coordinates (Angstroms)</b> |             |             | H | 6.11061100  | -3.07309500 | -0.52100600 |
| <b>Type</b>   | <b>X</b>                       | <b>Y</b>    | <b>Z</b>    | H | 5.15379600  | -3.66444000 | 0.88248100  |
| C             | 0.86905200                     | 3.21846200  | -0.14262700 | H | 0.34928100  | -2.67038400 | -0.65733400 |

|    |             |             |            |
|----|-------------|-------------|------------|
| Cl | -6.64765600 | -1.70696000 | 0.28430400 |
| H  | 3.54972300  | -0.32738200 | 0.36801100 |
| C  | 2.02839200  | -0.42042600 | 1.82434400 |
| C  | 2.82281900  | -0.88634000 | 2.78610900 |
| H  | 0.99404600  | -0.14966300 | 2.05252400 |
| H  | 2.47632700  | -1.01433200 | 3.80857800 |
| H  | 3.86019200  | -1.15897300 | 2.58719400 |

**IM7**

| Atomic Type | Coordinates (Angstroms) |             |             |
|-------------|-------------------------|-------------|-------------|
|             | X                       | Y           | Z           |
| C           | -1.73289500             | 2.47487000  | 0.24696900  |
| C           | -1.37392000             | 1.11937900  | 0.43047000  |
| C           | -2.39021900             | 0.19570200  | 0.75447200  |
| C           | -3.69465400             | 0.70747500  | 0.82195000  |
| C           | -4.01660700             | 2.04826300  | 0.61612900  |
| C           | -3.02208900             | 2.97457600  | 0.33010900  |
| C           | 0.48217400              | 2.39841200  | -0.03386600 |
| C           | 0.07934600              | 1.06708500  | 0.24979200  |
| H           | -4.50041900             | 0.01261900  | 1.05350200  |
| H           | -5.05209800             | 2.37002800  | 0.69290800  |
| H           | -3.24440200             | 4.02902700  | 0.18318900  |
| H           | 1.46078700              | 2.76529800  | -0.32076000 |
| N           | -0.57153400             | 3.20710200  | -0.04494100 |
| C           | -0.56852800             | 4.62063400  | -0.36738600 |
| H           | -1.21039900             | 4.80440700  | -1.23447500 |
| H           | -0.94383100             | 5.19677700  | 0.48405100  |
| H           | 0.44973100              | 4.93755200  | -0.59675100 |
| C           | -2.23050600             | -1.28180600 | 1.08772200  |
| C           | 0.91109300              | -0.03538800 | 0.16793700  |
| H           | 0.43325800              | -1.02431000 | 0.08697900  |
| C           | -1.88498600             | -2.27209500 | -0.11655000 |
| N           | -0.50766800             | -2.76028300 | 0.01475400  |
| H           | -3.23166100             | -1.59484400 | 1.40790800  |
| H           | -0.26947300             | -3.29026000 | -0.82125200 |
| C           | 2.33847500              | -0.05339300 | 0.11990100  |
| C           | 2.95121000              | -1.17677900 | -0.48289300 |
| C           | 3.17096200              | 0.95556800  | 0.65677100  |
| C           | 4.32389500              | -1.25681800 | -0.61792000 |
| H           | 2.31546700              | -1.96640800 | -0.87979300 |
| C           | 4.54544600              | 0.87191600  | 0.55195500  |
| H           | 2.73116600              | 1.77380200  | 1.22429200  |
| C           | 5.11674000              | -0.22650700 | -0.10333700 |
| H           | 4.79224400              | -2.10653300 | -1.10678500 |
| H           | 5.18817100              | 1.63185600  | 0.98730500  |

|    |             |             |             |
|----|-------------|-------------|-------------|
| C  | -2.90142600 | -3.41529800 | -0.09402400 |
| H  | -3.92631600 | -3.05760900 | -0.23362100 |
| H  | -2.68790600 | -4.14841400 | -0.88103600 |
| H  | -2.84549700 | -3.93388500 | 0.87212200  |
| C  | -1.95193000 | -1.49981300 | -1.42909800 |
| O  | -0.98711200 | -1.14504200 | -2.07405400 |
| O  | -3.22337800 | -1.22456000 | -1.75720500 |
| C  | -3.37970200 | -0.39261000 | -2.91521900 |
| H  | -2.93781300 | -0.87212400 | -3.79228100 |
| H  | -4.45440800 | -0.26489500 | -3.04179100 |
| H  | -2.89018600 | 0.57380000  | -2.75246500 |
| C  | -1.32920000 | -1.49887600 | 2.27108900  |
| C  | -1.69708600 | -2.17409400 | 3.35912600  |
| H  | -0.32289700 | -1.07871600 | 2.22068800  |
| H  | -1.02419800 | -2.31541900 | 4.20139800  |
| H  | -2.69401700 | -2.60487500 | 3.45627300  |
| Cl | 6.82935000  | -0.32342700 | -0.24524500 |
| H  | -0.46946900 | -3.41196900 | 0.79633600  |

**IM8**

| Atomic Type | Coordinates (Angstroms) |             |             |
|-------------|-------------------------|-------------|-------------|
|             | X                       | Y           | Z           |
| C           | 0.95083000              | 3.14966200  | -0.04459700 |
| C           | 0.94751800              | 1.73686200  | 0.04021400  |
| C           | 2.15038000              | 1.08197300  | 0.38537100  |
| C           | 3.27527600              | 1.90068600  | 0.56498500  |
| C           | 3.25388800              | 3.28883500  | 0.42891100  |
| C           | 2.06903500              | 3.94931400  | 0.12957400  |
| C           | -1.17520800             | 2.53036100  | -0.33220000 |
| C           | -0.44375200             | 1.33345200  | -0.15019600 |
| H           | 4.21510400              | 1.42081100  | 0.83601800  |
| H           | 4.16620500              | 3.85852200  | 0.58573100  |
| H           | 2.02069700              | 5.03348500  | 0.05728900  |
| H           | -2.22083600             | 2.65198400  | -0.59191400 |
| N           | -0.35692100             | 3.58309300  | -0.30023600 |
| C           | -0.72381600             | 4.96560800  | -0.53404000 |
| H           | -0.15732200             | 5.36486900  | -1.38093200 |
| H           | -0.50700400             | 5.56496800  | 0.35593500  |
| H           | -1.79080900             | 5.02400700  | -0.75423900 |
| C           | 2.34411800              | -0.40770100 | 0.58657600  |
| C           | -0.98497400             | 0.05915300  | -0.28761000 |
| H           | -0.27863100             | -0.71439000 | -0.61039100 |
| C           | 2.69029400              | -1.16125500 | -0.73880300 |
| N           | 1.52816400              | -1.14834500 | -1.63169900 |
| H           | 1.51930800              | -2.02708300 | -2.14862800 |



|    |             |             |             |
|----|-------------|-------------|-------------|
| C  | -2.35800700 | -0.30287200 | -0.15613400 |
| C  | -2.80668200 | -1.49556600 | -0.77027800 |
| C  | -3.28789000 | 0.45509100  | 0.59387500  |
| C  | -4.13345700 | -1.87541900 | -0.70879200 |
| H  | -2.09377900 | -2.10511300 | -1.32338300 |
| C  | -4.61234300 | 0.07536000  | 0.67663400  |
| H  | -2.94199500 | 1.31403900  | 1.16609600  |
| C  | -5.03500200 | -1.08124600 | 0.00873900  |
| H  | -4.48116300 | -2.78061800 | -1.19884400 |
| H  | -5.32313900 | 0.64386900  | 1.26988500  |
| C  | 3.94805200  | -0.59019300 | -1.40015200 |
| H  | 4.80514900  | -0.59047300 | -0.71752700 |
| H  | 4.21743900  | -1.18410200 | -2.28108900 |
| H  | 3.77727300  | 0.44136400  | -1.73021100 |
| C  | 2.97583600  | -2.63032300 | -0.41030500 |
| O  | 2.46776600  | -3.56503400 | -0.99246000 |
| O  | 3.87672100  | -2.74575200 | 0.57276700  |
| C  | 4.23132100  | -4.09821000 | 0.91221300  |
| H  | 4.66121100  | -4.60384300 | 0.04401500  |
| H  | 4.96245600  | -4.01443800 | 1.71534500  |
| H  | 3.34657400  | -4.64705800 | 1.24581600  |
| H  | 1.63349700  | -0.40153600 | -2.31452900 |
| Cl | -6.68587200 | -1.55272200 | 0.11007200  |
| H  | 3.24830200  | -0.50473900 | 1.20674200  |
| C  | 1.23881900  | -1.10873000 | 1.33574300  |
| C  | 0.55059200  | -0.60586400 | 2.36203000  |
| H  | 1.02121700  | -2.13138700 | 1.01426000  |
| H  | -0.19700600 | -1.19623800 | 2.88644300  |
| H  | 0.71351900  | 0.40855600  | 2.72741600  |
